1           **Rapid and specific degradation of endogenous proteins in mouse models using**  
2                               **auxin-inducible degrons**

3  
4 Lewis Macdonald<sup>1\*</sup>, Gillian Taylor<sup>1\*</sup>, Jennifer Brisbane<sup>1</sup>, Ersi Christodoulou<sup>1</sup>, Lucy  
5 Scott<sup>1</sup>, Alex Von Kriegsheim<sup>2</sup>, Janet Rossant<sup>3</sup>, Bin Gu<sup>4, 5, 6</sup>, Andrew Wood<sup>1</sup>

6  
7 <sup>1</sup> MRC Human Genetics Unit, Institute of Genetics and Cancer, University of  
8 Edinburgh, Edinburgh, EH4 2XU, UK

9 <sup>2</sup> Cancer Research UK Edinburgh Centre, Institute of Genetics and Cancer,  
10 University of Edinburgh, Edinburgh, EH4 2XU, UK

11 <sup>3</sup> Program in Developmental and Stem Cell Biology, Peter Gilgan Centre for  
12 Research and Learning, Hospital for Sick Children, Toronto, Ontario, Canada

13 <sup>4</sup> Department of Obstetrics, Gynecology and Reproductive Biology, Michigan State  
14 University East Lansing, MI 48824, USA

15  
16 <sup>5</sup> Department of Biomedical Engineering; Michigan State University East Lansing, MI  
17 48824, USA

18  
19 <sup>6</sup> Institute for Quantitative Health Science and Engineering, Michigan State University  
20 East Lansing, MI 48824, USA

21  
22 \* Equal contribution

23 Requests relating to the Rosa26<sup>Tir1</sup> mouse allele to Bin Gu ([guibin1@msu.edu](mailto:guibin1@msu.edu)).

24 Requests relating to the Ncaph and Ncaph2 AID:Clover alleles and all other  
25 correspondence on the manuscript to Andrew Wood ([Andrew.j.wood@ed.ac.uk](mailto:Andrew.j.wood@ed.ac.uk)).

26  
27 **Highlights**

- 28
- 29 • **Auxin-inducible degradation of endogenously tagged proteins in living**  
30 **mice and a range of primary cells.**
  - 31 • **Most but not all cell types are competent for degradation**
  - 32 • **Dosage of the tagged protein, E3 ligase substrate receptor and ligand can**  
33 **all determine degradation kinetics**
  - 34 • **Rapid degradation of condensin subunits in lymphocytes reveals stage-**  
35 **specific requirements during cell division**
- 36

37 **Abstract**

38 Auxin-inducible degrons are a chemical genetic tool for targeted protein degradation  
39 and are widely used to study protein function in cultured mammalian cells. Here, we  
40 develop CRISPR-engineered mouse lines that enable rapid and highly specific  
41 degradation of tagged endogenous proteins *in vivo*. Most but not all cell types are  
42 competent for degradation. Using mouse genetics, we show that degradation  
43 kinetics depend upon the dose of the tagged protein, ligand, and the E3 ligase  
44 subunit Tir1. Rapid degradation of condensin I and condensin II – two essential  
45 regulators of mitotic chromosome structure - revealed that both complexes are  
46 individually required for cell division in precursor lymphocytes, but not in their  
47 differentiated peripheral lymphocyte derivatives. This generalisable approach  
48 provides unprecedented temporal control over the dose of endogenous proteins in  
49 mouse models, with implications for studying essential biological pathways and  
50 modelling drug activity in mammalian tissues.

51

52

53

54

55

## 56 **Introduction**

57 Methods to conditionally control gene function are an important part of the genetic  
58 toolbox in a wide range of experimental model systems. In rodents, conditional  
59 approaches typically make use of recombinases such as Cre and Flp, which allow  
60 the controlled excision, inversion or translocation of DNA flanked by recombinase  
61 target sites<sup>1</sup>. Despite the immense contribution that recombinase-based systems  
62 have made to mouse genetics, their utility in studies of protein function is  
63 fundamentally limited by the fact that they target DNA.

64 DNA manipulations impact protein function slowly, with kinetics that are  
65 determined by the natural half-life of pre-existing mRNA and protein molecules.  
66 Chemical genetic approaches such as the auxin inducible degron (AID) provide a  
67 potential solution to these problems<sup>2,3</sup>. Auxins (e.g. indole-3-acetic acid (IAA)) are  
68 plant hormones that bind to Tir1, the substrate receptor subunit of a Cullin Ring E3  
69 ubiquitin ligase complex<sup>4</sup>. IAA binding greatly increases the affinity of Tir1 for target  
70 proteins containing a degron polypeptide<sup>4</sup>, leading to the formation of a ternary  
71 complex, ubiquitination of the target protein, followed by its rapid degradation by the  
72 proteasome.

73 Pioneering work by the Kanemaki laboratory showed that this plant-specific  
74 system can be co-opted to conditionally degrade target proteins in non-plant species  
75<sup>2,5</sup>. This is achieved by genetically fusing short degron tags (44 amino acids<sup>6,7</sup>) to a  
76 protein of interest in cells that heterologously express a plant Tir1 transgene.  
77 Addition of IAA ligand then induces rapid degradation of the degron-tagged protein,  
78 often with a half-life of less than 30 minutes, in a manner which is both reversible  
79 and dosage controllable<sup>2</sup>. Other degron tag systems such as dTAG<sup>8,9</sup>, and  
80 HaloPROTAC<sup>10</sup> work on a similar conceptual basis, albeit via different molecular  
81 mechanisms.

82 These genetically encoded strategies for targeted protein degradation have  
83 revolutionised functional studies of essential proteins in cultured mammalian cells  
84 and invertebrates, providing insights into a range of 'fast' processes such as  
85 transcription<sup>11,12</sup>, chromosome looping<sup>6,13</sup> and the cell cycle<sup>14</sup>. However, targeted  
86 protein degradation in genetically engineered mammals remains in its infancy<sup>15,16</sup>,  
87 and it has not yet been possible to degrade tagged endogenous proteins in adult  
88 tissues. Such an ability would enable protein function to be compared across a wide  
89 range of 'normal' cell types and disease models.

90 In a proof-of-principle study, we (BG, JR) previously observed degradation of  
91 transcription factors in early mouse embryos that were mosaic for expression of both  
92 Tir1 and the AID-tagged target protein<sup>15</sup>. More recently, a modified AID system  
93 (AID2) was shown to induce degradation of a randomly integrated GFP transgene in  
94 adult and embryonic mouse tissues following intraperitoneal ligand injection<sup>16</sup>.  
95 However, the original and more extensively characterised AID system was not tested  
96 in this study due to difficulties in deriving stable mouse lines expressing *Oryza sativa*  
97 Tir1.

98 Here, we derive novel transgenic mouse lines to show that the original AID  
99 system is highly effective for acutely depleting endogenously expressed proteins in  
100 adult tissues, embryos and primary cells. Using a proteome-wide approach, we show  
101 that AID is highly specific for the target protein *in vivo*. Mechanistically, we find that  
102 the dosage of Tir1, IAA ligand and the AID-tagged target protein are all key  
103 determinants of degradation efficiency in primary cells. We then focus on the two  
104 mammalian condensin complexes to show that IAA-responsive mice allow the  
105 comparison of ‘essential’ protein function over short time-scales across cell lineages,  
106 and at different stages of differentiation.

## 107 **Results**

### 108 Rapid degradation of AID-tagged endogenous proteins in primary cells

109 The condensin I and II complexes (Figure 1A) are essential for mitotic chromosome  
110 formation and chromosome segregation in vertebrate cells<sup>17</sup>, and are thought to  
111 work via a DNA-dependent motor activity to generate loops in chromosomal DNA  
112<sup>13,18</sup>. AID-tagging of condensin subunits has enabled the consequences of their  
113 acute depletion to be studied in various cancer cell lines<sup>13,19,20</sup>. However, it has been  
114 challenging to compare the functional requirement for condensins, or indeed other  
115 essential proteins, during cell division in different somatic cell lineages.

116 To address this, we generated mice in which the function of each condensin  
117 complex could be perturbed by IAA-mediated targeted proteolysis. The Easi-  
118 CRISPR approach<sup>21,22</sup> was used to generate two transgenic lines in which cassettes  
119 encoding the mini-auxin-inducible-degron and Clover fluorescent protein  
120 (AID:Clover) were fused to the C-terminus of endogenous condensin subunit genes  
121 via a short flexible linker peptide (Ncaph<sup>AID:Clover</sup> & Ncaph2<sup>AID:Clover</sup>, Figure 1A, 1B,  
122 Supplemental Methods). The kleisin subunits Ncaph and Ncaph2 were selected for  
123 tagging as they are expressed at levels that are limiting for holocomplex assembly  
124 (Walther et al 2018), and are known to be essential for condensin complex function  
125 in mice<sup>23,24</sup>. Degradation of Ncaph and Ncaph2 should therefore ablate the function  
126 of condensin I and II, respectively.

127 In line with previous studies in cultured cells<sup>13,20,25</sup>, C-terminal tagging did not  
128 substantially affect steady-state expression (Figure 1C), or localisation to mitotic  
129 chromosomes (Figure 1D), for either fusion protein. Mice homozygous for the tagged  
130 alleles were born at the expected mendelian frequency from crosses of  
131 heterozygous parents (Figure S1A), whereas null mutations in either target gene are  
132 known to cause embryonic lethality in the homozygous state<sup>23,24</sup>. Ncaph<sup>AID:Clover</sup>  
133 homozygotes had similar litter sizes (Figure S1B), and were not growth impaired  
134 (Figure S1C) compared to heterozygotes, but Ncaph2 homozygotes were less fertile  
135 and smaller (Figure S1B, S1C). No other developmental abnormalities were  
136 observed in either line, indicating that the essential functions of Ncaph and Ncaph2  
137 are largely retained by the tagged proteins.

138 In parallel, we generated transgenic animals expressing the *Oryza sativa* (*Os*)  
139 *Tir1* gene constitutively by targeting a Tir1 expression construct to the *Rosa26* locus  
140 (Figure 1E, Figure S1D) by microinjection of CRISPR-Cas9 reagents and a plasmid

141 donor into mouse embryos at the two-cell stage<sup>15,26</sup>. Initially, we attempted but failed  
142 to generate a mouse line constitutively expressing the *OsTir1* gene at the *Rosa26*  
143 locus driven by the CAG promoter, consistent with other reports<sup>16</sup>. We reasoned  
144 that the transient overexpression of Tir1 from the many copies of injected donor  
145 plasmids may have led to non-specific protein degradation in embryos and  
146 prevented us from generating live founder pups. We circumvented this hurdle by first  
147 generating a single copy insertion of a conditionally activatable Lox-STOP-Lox (LSL)  
148 allele (R26-CAG-LSL-TIR1-9myc (Figure S1D)). The R26-CAG-LSL-TIR1-9myc mice  
149 were then bred with a constitutive Cre line (pCX-NLS-Cre) to remove the LSL  
150 cassette and generate the R26-CAG-TIR1-9myc mouse line (hereafter *Rosa26<sup>Tir1</sup>*).  
151 Western blotting revealed broad expression of Tir1 across tissues (Figure S1E).

152 In order to generate IAA-responsive mice, we performed crosses to combine  
153 the *Rosa26<sup>Tir1</sup>* allele with either *Ncaph<sup>AID:Clover</sup>* or *Ncaph2<sup>AID:Clover</sup>* in double transgenic  
154 animals (Figure 1F). The presence of Tir1 has previously been reported to induce  
155 'basal' degradation of some AID tagged target proteins even in the absence of  
156 exogenous IAA<sup>16,27,28</sup>. Importantly, the presence of *Rosa26<sup>Tir1</sup>* alleles had little  
157 (*Ncaph*) or no (*Ncaph2*) effect on target protein expression (Figure 1G). Accordingly,  
158 double homozygotes were obtained at, or greater than, the expected mendelian  
159 frequencies from crosses of *Ncaph-* or *Ncaph2<sup>AID:Clover/AID:Clover</sup>*; *Rosa26<sup>OsTir1/+</sup>* parents  
160 (Figure S1F), and both sexes were fertile (Figure S1G). No significant difference in  
161 weight was observed between *Ncaph-* or *Ncaph2<sup>AID:Clover/AID:Clover</sup>* animals with 0, 1 or  
162 2 alleles of *Rosa26<sup>osTir1</sup>* (Figure S1H). Thus, despite low-level affinity of Tir1 for the  
163 degron peptide in the absence of auxin<sup>4</sup>, we conclude that the *Rosa26<sup>osTir1</sup>*  
164 transgene did not cause biologically significant levels of auxin-independent  
165 degradation for either target protein.

166 The ability of IAA to induce targeted protein degradation was then tested in  
167 short term cultures of primary CD8<sup>+</sup> thymocytes, embryonic fibroblasts and neural  
168 stem cells harvested from animals homozygous for either AID-tagged allele in  
169 combination with Tir1 (Figure 2A). In each case, addition of IAA to the culture media  
170 resulted in near complete (>90%) protein degradation within 2 hours (Figure 2B, 2C,  
171 2D, 2E).

172

173 *Dosage of ternary complex components determines degradation efficiency*

174 AID and other degron tagging approaches achieve protein degradation through the  
175 formation of a ternary complex comprising a ligand, an E3 ligase substrate receptor,  
176 and the degron-tagged target protein (Figure 3A, <sup>4</sup>). Complex formation induces  
177 ubiquitination of target proteins via an E3 ligase: for the AID system this is SCF<sup>Tir1</sup>. It  
178 is well established that the kinetics of protein degradation are determined, and can  
179 be experimentally manipulated by, ligand dose <sup>2,3</sup>. We confirmed this finding in  
180 primary neural stem cells derived from *Ncaph*<sup>AID:Clover/AID:Clover</sup> and  
181 *Ncaph2*<sup>AID:Clover/AID:Clover</sup> animals homozygous for *Rosa26*<sup>Tir1</sup> (Figure 2E). Whether the  
182 kinetics of targeted protein degradation are also controlled by the cellular dosage of  
183 the target protein and/or substrate receptor is less well understood.

184 To address the role of substrate receptor dosage, we compared the efficiency  
185 of target protein degradation in primary thymocytes derived from animals with  
186 homozygous AID:Clover-tagged *Ncaph* or *Ncaph2* substrate proteins in combination  
187 with either 1 or 2 copies of the *Rosa26*<sup>Tir1</sup> transgene. This analysis revealed that two  
188 copies of *Tir1* resulted in more efficient degradation of target proteins compared to a  
189 single copy (Figure 3B, 3C, 3D). The same trend was observed consistently for both  
190 *Ncaph* and *Ncaph2* target proteins (Figure 3B, 3C), in the presence of either one or  
191 two AID-tagged alleles (Figure 3B & 3C, Figure S2). Depletion kinetics of  
192 mammalian proteins are therefore controlled not only by ligand dose, but also by  
193 dosage of the E3 ligase substrate receptor protein *Tir1*.

194 To determine the effect of target protein dosage on degradation efficiency, we  
195 designed a competition experiment which took advantage of the two distinct AID-  
196 tagged alleles that were available. The relative steady-state expression level of  
197 tagged *Ncaph* and *Ncaph2* proteins was first quantified by flow cytometric  
198 measurement of Clover fluorescence in primary thymocytes. This revealed that the  
199 ratio of *Ncaph* to *Ncaph2* is approximately 4.5 : 1 (Figure 4A), which is consistent  
200 with previous measurements in HeLa cells <sup>25</sup>. Next, we performed crosses to  
201 generate *Ncaph2*<sup>AID:mClover/+</sup> animals carrying either 0, 1 or 2 alleles of *Ncaph*<sup>AID:mClover</sup>  
202 on a *Rosa26*<sup>Tir1/Tir1</sup> background, which allowed us to ask how the degradation  
203 kinetics of a constant dose of *Ncaph2* protein are affected by the addition of ‘decoy’  
204 *Ncaph* proteins at increasingly high dose (Figure 4B & 4C). These experiments  
205 confirmed that *Ncaph2* degradation was less efficient when the overall quantity of  
206 AID-tagged protein increased (Figure 4D & 4E). In summary, dosage of all three

207 components of the ternary complex can be limiting, and therefore control the  
208 degradation kinetics of AID-tagged target proteins.

209

### 210 Comparing essential gene function between primary cell types

211 Loss of function mutations in condensin subunits cause fully penetrant embryonic  
212 lethality in mice<sup>23,24,29</sup>, but it is not known whether each complex is absolutely  
213 required for cell division throughout development. Our system for rapidly depleting  
214 essential condensin I and condensin II subunits in different primary cell types  
215 enabled us to address this question. A BrdU-pulse chase assay was established to  
216 assess the efficiency of cell division during a single cell cycle across primary cell  
217 types.

218 We chose to focus on lymphocyte development, specifically comparing how  
219 rapid degradation of either condensin I or II subunits affected cell division in  
220 precursor versus mature cells in both the B and T cell lineages. Explanted cells from  
221 the bone marrow (precursor B), thymus (precursor T) or spleen (peripheral B and T –  
222 see Methods for cell purification details) were cultured for two hours in the presence  
223 or absence of auxin to degrade either Ncaph or Ncaph2, then subjected to a 30  
224 minute BrdU pulse followed by washout and chase (Figure 5A). BrdU and DNA  
225 content were then measured by flow cytometry (Figure 5B). Over time, a fraction of  
226 BrdU<sup>+</sup> cells divide to form G1 daughter cells with 2n DNA content (Figure 5C). If loss  
227 of either condensin complex inhibits cell division, IAA treatment should reduce the  
228 fraction of BrdU<sup>+</sup> cells that progress through mitosis into G1 during the chase (Figure  
229 5D). By quantifying and comparing the extent of this reduction across cell types  
230 (Figure 5E), we tested their ability to complete a single cell division in the near  
231 absence of condensin I or II. As expected, acute degradation of either Ncaph or  
232 Ncaph2 did not affect BrdU incorporation (Figure S3A) or induce marks of DNA  
233 damage during S phase (Figure S3B), but instead caused an accumulation of 4N  
234 cells (Figure 5D) consistent with a cell cycle block during G2/M.

235 In primary cells from *Ncaph*<sup>AID:Clover/AID:Clover</sup>; *Rosa26*<sup>Tlr1/Tlr1</sup> mice, acute  
236 depletion of an essential condensin I subunit impacted cell division to a significantly  
237 greater extent in precursor T cells isolated from the thymus compared to activated  
238 mature T cells isolated from the spleen (Figure 5D, 5E & 5F). In thymocytes, where  
239 most cell division occurs at the ‘beta-selection’ stage of T cell differentiation<sup>30</sup>,  
240 treatment caused an 88% reduction (21.6% versus 3.1%, Figure 5E, 5F) in the



241 fraction of G1 cells among the BrdU<sup>+</sup> population following a 3.5 hour chase. In  
242 contrast IAA treatment of activated splenic T cells caused only a 22% reduction in  
243 this population (39% versus 31% of BrdU<sup>+</sup> cells in G1, Figure 5E & 5F). By the same  
244 measure, precursor B cells isolated from the bone marrow were significantly more  
245 sensitive to Ncaph depletion compared to mature B cells isolated from the spleen  
246 (67% versus 48% reduction in BrdU<sup>+</sup> G1 cells, respectively, Figure 5E & 5F). The  
247 same experiments repeated in primary cells from *Ncaph*<sup>AID:Clover/AID:Clover</sup>;  
248 *Rosa26*<sup>Tir1/Tir1</sup> animals revealed similar trends, with precursors more sensitive to  
249 condensin perturbation compared to mature cells, albeit with less profound effect  
250 sizes.

251 The observed differences between cell types were not attributable to  
252 differences in the extent of protein degradation, which were similar between  
253 precursor and peripheral cell populations (Figure S3C). However despite the  
254 relatively mild consequences of condensin degradation on peripheral lymphocytes  
255 over a single cell division (Figure 5D, 5E & 5F), cell trace experiments still showed a  
256 clear impact on proliferation over several cell cycles (Figure S3D). Altogether, these  
257 experiments show that lymphocytes at later stages of differentiation are better able  
258 to complete a single round of cell division in the near-absence of either condensin I  
259 or condensin II compared to their respective precursor cell populations.

260

### 261 Acute degradation of AID-tagged proteins in living mice

262 Having established the utility of the AID system to compare essential protein  
263 functions between primary cell types, we next investigated its use in living adult  
264 mice. Because condensin expression is largely restricted to proliferating cells in adult  
265 tissues, we initially focused on haematopoietic organs where dividing cells are  
266 abundant. In a pilot dose-finding study, adult *Ncaph*<sup>AID:Clover/+</sup> *Rosa26*<sup>Tir1/Tir1</sup> mice  
267 received a single dose of IAA via intraperitoneal (I.P.) injection, then thymus tissue  
268 was collected 2 hours later to quantify Clover fluorescence using flow cytometry.  
269 Increasing levels of protein degradation were observed as the dose was increased  
270 from 50 to 100 mg kg<sup>-1</sup> (Figure S4A). All subsequent experiments were therefore  
271 performed using the 100 mg kg<sup>-1</sup> dose. To evaluate hepatic toxicity of IAA, a panel of  
272 liver function tests was performed on plasma collected from animals either 2 hours or  
273 72 hours following I.P. injection of IAA or vehicle. No significant differences were  
274 observed (Figure S4B).

275 Adult animals homozygous for AID-tagged kleisin alleles and Tir1 were then  
276 injected I.P. with IAA, then haematopoietic organs were collected either 1 or 2 hours  
277 post-injection (Figure 6A). Flow cytometric quantification of Clover fluorescence in  
278 proliferating thymocytes (Figure 6A) and bone marrow B cell precursors (Figure S4B)  
279 revealed that a majority of target protein was typically degraded within 1 hour of  
280 injection, and near complete degradation (>90%) was achieved within two hours,  
281 although some variability was observed between replicates. To validate knockdown  
282 efficiency using an orthogonal method, and to assess the proteome-wide specificity  
283 of the AID system, thymus tissue was collected from *Ncaph2<sup>AID:Clover/AID:Clover</sup>*  
284 *Rosa26<sup>Tir1/Tir1</sup>* animals 2 hours following I.P. injection of IAA or vehicle, and  
285 proteomic quantification was performed using mass spectrometry (Figure 6B). This  
286 confirmed profound (~10-fold) downregulation of the target protein. Remarkably, no  
287 other protein was significantly downregulated using thresholds of  $p < 0.01$  and  $> 2$ -  
288 fold change. Only a single protein (the heat shock protein Hspb11) was significantly  
289 upregulated. Relaxing the significance threshold to  $p < 0.05$  led to only 3  
290 downregulated proteins and an additional two upregulated proteins (Table S1). We  
291 conclude that IAA injection can achieve not only rapid and profound, but also highly  
292 specific degradation of AID-tagged proteins *in vivo*.

293 To assess the kinetics of protein degradation and recovery over longer  
294 periods following single dose I.P. administration of IAA, we generated  
295 *Ncaph<sup>AID:Clover/+</sup> Rosa26<sup>Tir1/Tir1</sup>* animals, in which AID-tagged protein could be  
296 degraded while leaving a pool of untagged protein to support ongoing cell division.  
297 Protein levels began to recover within 6 hours post-injection before returning to  
298 baseline levels within 72 hours (Figure 6C). This shows that degradation of  
299 endogenous proteins via the AID system is reversible *in vivo*.

300 Target protein was also efficiently degraded in 2 hours within mitotic crypt  
301 cells of the small intestine (Figure S5A). However we observed individual interphase  
302 cells that appeared resistant to degradation (Figure S5A, white arrow). Similarly,  
303 bone marrow erythroblasts (Ter119<sup>+</sup>) retained Clover fluorescence after IAA  
304 exposure *in vivo* (Figure S5B). The barrier to degradation in this cell type was cell  
305 intrinsic rather than a property of the tissue environment, because Ter119<sup>+</sup> cells in *ex*  
306 *vivo* bone marrow cultures also failed to degrade Ncaph in response to IAA  
307 treatment, whereas CD19<sup>+</sup> cells in the same culture degraded efficiently (Figure  
308 S5C). Protein degradation was also inefficient in dividing spermatocytes (Figure

309 S5D). In this case, we speculate that the blood-testes barrier could prevent IAA from  
310 entering seminiferous tubules to effect protein degradation, although cell intrinsic  
311 barriers to degradation cannot be excluded.

312 Finally, we tested the ability of IAA to degrade AID:Clover-tagged Ncaph in  
313 embryos. Adult females homozygous for *Ncaph*<sup>AID:Clover</sup> and *Rosa26*<sup>Tir1</sup> transgenes  
314 were mated with males of the same genotype, then injected I.P. with IAA (100 mg kg<sup>-1</sup>)  
315 or vehicle at 10.5 days post coitum (Figure 6D). Embryos were collected 4 hours  
316 later, and Ncaph levels were quantified by immunofluorescence performed on whole  
317 mount embryonic cryosections co-stained with antibodies recognising E-Cadherin  
318 (Cdh1). This revealed near complete protein degradation within Cdh1 positive  
319 regions of the developing surface ectoderm (Figure 6E, 6F & 6G). These data show  
320 that IAA is able to cross the placenta to achieve robust protein degradation in  
321 embryonic cells.

322

323

324

## 325 **Discussion**

326 In this paper we describe a broadly applicable approach to study the consequences  
327 of acute protein loss in mammalian primary cells, tissues and whole organisms. The  
328 ability to trigger protein degradation using small molecules has numerous  
329 advantages over alternative reverse genetic approaches. Most importantly, protein  
330 function is removed in less than 2 hours; substantially quicker than would be  
331 possible using gene editing nucleases, recombinases or RNAi. Rapid removal is  
332 particularly important for studying essential cell cycle proteins such as condensins,  
333 where secondary and tertiary phenotypes arising downstream from abnormal cell  
334 division can quickly obscure primary phenotypes<sup>31</sup>. Given the central importance of  
335 condensins in establishing chromosome architecture during cell division<sup>13,17,32,33</sup>,  
336 combined with persistent and unresolved questions about their involvement in other  
337 physiological processes in mammals<sup>34-37</sup>, we anticipate that the two mouse models  
338 described here will provide an important resource for the chromosome biology  
339 community.

340 To demonstrate the utility of this system, we compared the ability of non-  
341 immortalised primary lymphocyte populations, from different lineages and stages of  
342 differentiation, to undergo a single round of cell division in the near absence of  
343 Ncaph and Ncaph2 (Figure 5). Our results show that different cell types differ in their  
344 ability to complete a single round of cell division in the near absence of these  
345 proteins, adding to an increasing body of data suggesting cell-type-specific  
346 differences in the consequences of condensin perturbation<sup>38-41</sup>. Elucidating the  
347 cause of these differences was beyond the scope of the current study, but it could  
348 potentially involve cell-type-specific chromosome topology (e.g. fewer catenations to  
349 remove in mature cells), or cell cycle checkpoints (e.g. greater sensitivity to mitotic  
350 arrest in precursor cells). In the future, we expect these two degrader mouse lines  
351 will provide valuable insights into chromosome biology and mitotic chromosome  
352 structure in the context of *in vivo* cellular heterogeneity, development and disease.

353 Protein degradation was achievable in a range of cell types, including B and T  
354 lymphocytes at different developmental stages (precursor and mature, Figure S3C),  
355 fibroblasts (Figure 2D), neural stem cells (Figure 2E), gut epithelial cells (Figure  
356 S5A), and embryonic Cdh1<sup>+</sup> cells of the developing surface ectoderm (Figure 6G).  
357 However, a minority of cell types proved refractory. For example, erythroid  
358 progenitors failed to degrade AID-tagged proteins due to a cell intrinsic block (Figure

359 S5B & S5C). We speculate that erythroblasts lack one or more components of the  
360 ubiquitin proteasome system that is necessary for degradation via the AID system.  
361 Spermatocytes also failed to degrade (Figure S5D), likely due in part to poor ligand  
362 transit across the blood testes barrier. An analogous barrier prevents many small  
363 molecules from penetrating into the adult brain. Poor expression of condensins in  
364 post-mitotic tissues prevented us from testing AID function in the brain; however, a  
365 structurally related ligand for the AID2 system (5'Ph-IAA<sup>16</sup>) was found to have  
366 relatively weak protein degradation activity in this tissue.

367 By performing genetic crosses to generate animals with different allelic  
368 combinations we showed that the dosage of all three components of the ternary  
369 complex formed between the target protein, ligand and Tir1 substrate receptor  
370 protein, can determine the kinetics of protein degradation in mammalian primary  
371 cells (Figure 2E, Figure 3, Figure 4). This could have implications for understanding  
372 the activity of protein degrader drugs such as PROTACs and IMiDs. For example,  
373 variability in expression of the substrate receptor protein CRBN has been correlated  
374 with patient responses to iMID treatment in haematological malignancy<sup>42</sup>. Our data  
375 (Figure 3, Figure S2) provide empirical support for a causative link between  
376 substrate receptor dose and the protein degradation activity of molecular glue  
377 compounds. Moreover, our finding that high cellular doses of target protein reduce  
378 the overall efficiency of protein degradation (Figure 4) suggests that highly  
379 expressed proteins could, on average, make more challenging targets for chemical  
380 degradation strategies.

381 Concerns have been raised about the AID system because a subset of AID-  
382 tagged proteins can undergo Tir1-dependent turnover even in the absence of  
383 exogenous IAA. We showed that the presence of Tir1 had little or no effect on the  
384 expression of two different AID-tagged condensin subunit proteins in the absence of  
385 ligand (Figure 1G), but enabled their rapid degradation, often to levels below 10% of  
386 baseline, within 1 to 2 hours of ligand exposure (Figure 2, Figure 6). Regulated  
387 induction of Tir1 expression in yeast has demonstrated that leaky degradation of  
388 target proteins occurs as a consequence of Tir1 overexpression<sup>28</sup>. Achieving Tir1  
389 expression levels sufficient for IAA-inducible degradation yet insufficient for IAA-  
390 independent degradation is therefore of paramount importance. That leaky  
391 degradation did not cause problems in our study suggests that the single-copy  
392 *Rosa26<sup>Tir1</sup>* allele generated via genome editing is expressed within this desirable

393 range, at least for these two proteins. If leaky degradation were a problem for other  
394 target proteins, this could be kept to a minimum through the use of *Rosa26<sup>Tir1</sup>*  
395 heterozygotes. While our work was ongoing, point mutations in Tir1 have been  
396 identified that, in combination with a modified ligand, eliminate Tir1-dependent leaky  
397 degradation, and allow degradation to be induced at much lower ligand  
398 concentrations<sup>16</sup>. We therefore predict that AID tagging should be applicable to  
399 study a broad range of intracellular proteins in mice and their primary cell derivatives.

400 A very recent preprint has reported targeted degradation of endogenously  
401 tagged NELFB protein using dTAG<sup>43</sup>: another promising degron-tagging approach  
402<sup>8,9</sup>. dTAG uses distinct tags, ligands and E3 ligase interactions, and should therefore  
403 be compatible with the AID system developed here to enable orthogonal chemical  
404 control of two different proteins in mice. In contrast to AID, which requires exogenous  
405 expression of the E3 ligase protein Tir1, dTAG uses endogenous E3 ligases to  
406 achieve protein degradation and could therefore be simpler to establish in mice.  
407 However, this same property could also prevent future applications that require  
408 tissue- or cell-type selective protein degradation. This is achievable using AID via  
409 tissue-specific expression of Tir1, as shown in *C. elegans*<sup>44,45</sup>. Further work is  
410 needed to assess the safety and efficacy of each approach for protein degradation  
411 across targets, tissues, disease states and timescales. Nonetheless, our  
412 demonstration that degron tagging systems are effective in living mice should enable  
413 more versatile conditional alleles to study protein function, and to model drug activity,  
414 in mouse models of development and disease.

415

416

417

418

419

## 420 **Materials and Methods:**

### 421 **Mouse maintenance and husbandry**

422 All animal work was approved by a University of Edinburgh internal ethics committee  
423 and was performed in accordance with institutional guidelines under license by the  
424 UK Home Office. AID knock-in alleles were generated under project license PPL  
425 60/4424. Rosa26<sup>Tir1</sup> knockin mouse lines were generated under the Canadian  
426 Council on Animal Care Guidelines for Use of Animals in Research and Laboratory  
427 Animal Care under protocols approved by the Centre for Phenogenomics Animal  
428 Care Committee (20-0026H). Experiments involving double transgenic animals were  
429 conducted under the authority of UK project license PPL P16EFF7EE

430 Mice were maintained at the Biological Research Facility, Western General  
431 Hospital, Edinburgh. All experimental animals were between 6 and 16 weeks in age  
432 unless otherwise specified. Mice were housed in individually ventilated cages with 12  
433 hour light/dark cycles. All tissues were harvested and processed immediately  
434 following euthanasia via cervical dislocation or CO<sub>2</sub>.

435

### 436 **Generation of Ncaph and Ncaph2 degron-reporter mice.**

437 *Ncaph-AID-mClover* and *Ncaph2-AID-mClover* mice were generated following the  
438 Easi-CRISPR protocol <sup>21</sup>. sgRNAs were designed using the Zhang Lab design tool  
439 ([crispr.mit.edu](http://crispr.mit.edu)) and ordered from IDT. Priority was given to protospacer sequences  
440 that would result in cleavage proximal to the stop codon with low predicted likelihood  
441 for off-target cleavage. Repair templates were long single stranded oligonucleotides  
442 ('megamers') ordered from IDT. Each megamer comprised 105 nucleotides of  
443 homology either side of the integrated sequence. Integrations included linker  
444 sequence and the 44 amino acid mini auxin-inducible degron used by Nora et al <sup>6,7</sup>  
445 fused in-frame with the fluorescent protein Clover <sup>46</sup>. Full nucleotide sequences for  
446 the guide RNA target sequence and repair templates are listed in Appendix S1.

447 The microinjection mix comprised pre-annealed crRNA/TracrRNA complex (20ng/μl),  
448 repair template (5ng/μl), and Cas9 protein (NEB - 0.3 μM). This was incubated at  
449 37°C for 10 minutes before microinjection. Zygotes were collected from C57BL/6J  
450 females mated overnight with C57BL6/J stud males (Charles River Laboratories).  
451 Editing reagents were introduced via intracytoplasmic microinjection at the Evans  
452 Transgenic Facility (University of Edinburgh), cultured to the blastocyst stage before  
453 transfer to pseudopregnant CD1 females. Successful integrations were identified by

454 PCR using primers spanning the integration sites, then confirmed by observing band  
455 shifts on western blots probed with antibodies against wildtype NCAPH and  
456 NCAPH2 (Figure 1C). Founder animals were outcrossed for two generations with  
457 C57BL6/J animals and then N2 siblings were intercrossed to obtain homozygotes.

458

#### 459 **Generation of Rosa26<sup>Tir1</sup> knockin mice.**

460 The plasmid donor for generating Rosa26<sup>Tir1</sup> knockin mice was constructed as  
461 follows. A TIR1-9myc cassette was PCR amplified from the pBABE-TIR1-9myc  
462 plasmid (addgene 648945, a kind gift from Don Cleveland<sup>47</sup>). The cassette was  
463 inserted into MluI restriction site of the pR26 CAG AsiSI/MluI plasmid (addgene  
464 74286, a kind gift from Ralf Kuehn<sup>48</sup>) by infusion cloning (Takara). The coding  
465 sequence of TIR1-9myc was separated from the CAG promoter by a loxp-STOP-loxp  
466 (LSL) cassette.

467 The Rosa26-LSL-osTIR1-9myc(CD1-Gt(ROSA)26Sor<sup>em1(CAG-LSL-osTIR1-myc)Jrt</sup>) mouse  
468 line was generated using the 2C-HR-CRISPR method<sup>15</sup>. Cas9 mRNA (100ng/ul),  
469 R26 sgRNA (50ng/ul) and the Rosa26-LSL-osTIR1-9myc circular donor plasmid  
470 (30ng/ul) were microinjected into 2-cell stage embryos of CD1 mice. Full nucleotide  
471 sequences for the guide RNA target sequences and repair templates are listed in  
472 Appendix S1. Embryos were cultured overnight in KSOMaa (Cytospring) to reach the  
473 morula stage and then transferred to pseudopregnant CD1 females. 15 live pups  
474 were produced, 3 of them were validated to contain the correct insert by long range  
475 PCR. One male founder was crossed with wild a wildtype CD1 female to generate  
476 N1 offsprings. The N1s were first screened by long range PCR. For the positives,  
477 knock-in junction sequences were validated by sanger sequencing. Droplet Digital  
478 Quantitative PCR(ddqPCR) was performed by the The Center for Applied Genomics  
479 (TCAG) in Toronto to measure the copy number of the insert. All N1 animals tested  
480 had single copy insertions. The mouse line was outcrossed for another three  
481 generations to remove any possible off-target mutations that might have been  
482 induced by genome editing. The Rosa26-LSL-osTIR1-9myc mouse line is  
483 homozygous viable and were kept as homozygous breeding.

484 To generate the Rosa26<sup>Tir1</sup> allele (full name Rosa26-osTIR1-9myc (CD1-  
485 Gt(ROSA)<sup>26Sorem1.1(CAG-LSL-osTIR1-myc)Jrt</sup>) used in subsequent experiments, a Rosa26-  
486 LSL-osTIR1-9myc<sup>+/-</sup> male was mated with a pCX-NLS-cre (ICR-Tg(CAG-cre)<sup>1Nagy</sup>



487 female. Progeny were screened for removal of the LSL cassette by PCR and the  
488 mice carrying correctly recombined sequences were bred to establish the line. The  
489 *Rosa26<sup>Tir1</sup>* allele is homozygous viable and mice were bred in the homozygous state.

490

#### 491 **Whole Cell Protein Extract Preparation & Quantification**

492 Protein preparations were generated from either single cell suspensions of primary  
493 haematopoietic cells, or whole tissue. Single cell suspensions of thymus were  
494 generated by gentle dissociation of whole thymus tissue through 40 µm filters  
495 (Fisherbrand, 22-363-547). For bone marrow, tissue was flushed out of tibia and  
496 femur bones with PBS before dissociation through a 40 µm filter. Cell numbers were  
497 counted manually using a haemocytometer. Bone marrow cells were further purified  
498 by Magnetic Activated Cell Sorting (Miltenyi), using beads pre-coated with antibodies  
499 against B220, Ter-119, CD4 or CD8. MACS purification proceeded according to the  
500 manufacturers instructions. Cell pellets were resuspended in NP-40 Lysis Buffer  
501 (150mM NaCl, 50mM Tris-HCl, 1% NP-40) using 3 volumes of NP-40 Buffer to 1  
502 volume of cell pellet. 0.5 µL benzonase nuclease (Millipore) was added per 100 µL of  
503 resuspended pellet. Samples were incubated at 4 °C for 30 minutes with intermittent  
504 vortexing, before pelleting cellular debris via centrifugation at maximum speed  
505 (13,200 g, 15 minutes, 4 °C). For whole tissue samples, adult tissue (brain, thymus,  
506 lung, spleen, kidney, small intestine and liver) were removed, snap frozen in LN2,  
507 and stored at -80°C until use. Between 10-30mg of frozen tissue was weighed and  
508 homogenised in 1mL RIPA buffer (150mM NaCl, 1%NP-40, 0.5% NaDeoxycholate,  
509 0.1% SDS, 50mM Tris-HCl pH8 with 5µl benzonase (Millipore)) for 10 minutes using  
510 a TissueLyserLT (Qiagen), then incubated on ice for 30 minutes. Cellular debris was  
511 pelleted via centrifugation at maximum speed for 15 minutes at 4°C. Supernatants  
512 were transferred into fresh tubes, and protein concentration was quantified using a  
513 Pierce BCA Protein Assay Kit (Thermo, 23228) following manufacturer's instructions.  
514 Pierce Lane Marker Reducing Sample Buffer (1X, Thermo, 39000) was added to  
515 each sample prior to denaturation via boiling at 95 °C for 5 minutes. Samples were  
516 used immediately or stored at -20 °C.

517

#### 518 **Western Blotting**

519 Denatured protein lysates (12.5 µg/sample) were loaded on to NuPAGE 4-12% Bis-  
520 Tris 1.0 mm Mini Protein Gels (Invitrogen, NP0321) alongside Chameleon Duo

521 Protein Ladder (3  $\mu$ L/lane; LiCOR, 928-60000) or PageRuler Protein Ladder (5  
522  $\mu$ L/lane; Thermo Scientific, 26616) and run in pre-chilled 1X MOPS Buffer (Thermo,  
523 NP0001). Samples were typically run at 100 Volts for 90 minutes. Transfers were  
524 performed using either the iBlot2 Gel Transfer device according to manufacturer's  
525 instructions or wet transfer. PVDF membranes were pre-soaked in 100 % methanol  
526 (Fisher, 10284580) and rinsed briefly in Transfer Buffer (25 mM Tris (AnalaR,  
527 103156X), 200 mM glycine (Fisher, G-0800-60), 20% methanol, 0.02% SDS (IGMM  
528 Technical Services)). Genie Blotter transfer device (Idea Scientific) was assembled  
529 with the gel and PVDF membrane placed between two layers of cellulose filter paper  
530 (Whatman, 3030-917) inside the loading tray. Once the apparatus was prepared,  
531 Transfer Buffer was filled to the top of the Genie Blotter and transfer proceeded for  
532 90 minutes at 12 volts.

533 Conditions for blocking and antibody staining were optimised individually for  
534 each probe. Samples were blocked with either 5% milk powder (Marvel) in TBS  
535 (IGMM Technical Services) with 0.1% Tween20, or 3% BSA (Sigma) in TBS with  
536 0.1% Tween20, with constant agitation, either at room temperature for 1 hour, or at 4  
537 °C overnight.

538 Primary antibodies were added to the corresponding block solution at the  
539 dilution shown in Table S2. Membranes were incubated in the antibody dilutions with  
540 constant agitation, either at room temperature for 1 hour, or at 4 °C overnight.  
541 Membranes were washed in TBS-Tween20 solutions (0.1% Tween20; 4 washes x  
542 10 minutes). Fluorescent or HRP-conjugated secondary antibodies were also diluted  
543 in the corresponding block solution (with 0.1% Tween20), and membranes were  
544 incubated with secondary antibody dilutions under constant agitation at room  
545 temperature for 1 hour. Membranes were then washed in TBS-Tween20 solutions  
546 (0.1% Tween20, 4 washes x 10 minutes). Membranes were visualised on an  
547 Odyssey CLx Imaging System (LiCOR) or ImageQuant (Cytiva). Fluorescent  
548 antibodies were detected using either a 700 Channel Laser Source (685 nm) or 800  
549 Channel Laser Source (785 nm).

550

### 551 **Proteome analysis by Mass Spectrometry**

552 Mice were treated with 100mg/kg auxin via intraperitoneal injection for 2 hours, then  
553 culled by cervical dislocation. Thymus was removed and a single cell suspension of  
554 primary thymocytes was made using ice-cold PBS. CD8a<sup>+</sup> cells were isolated by

555 MACS using CD8a2 (Ly-2) microbeads (Miltenyi) following manufacturer instructions.  
556 Purified cells were lysed in whole proteome lysis buffer (6M GuHCl, 100mM TrisHCl  
557 8.5, 1mg/mL Chloracetamide, 1.5mg/mL TCEP) at a concentration of  $0.3 \times 10^6$   
558 cells/ $\mu$ L buffer. Lysate was sonicated with a probe sonicator (Soniprep 150) until no  
559 longer viscous, and boiled at 95°C for 5 minutes, then centrifuged at 14,000rpm for 5  
560 minutes. Supernatant was then transferred to a fresh tube and processed for Mass  
561 spectrometry.

562 A 50uL volume of sample was heated to 97°C for 5 minutes, then pre-digest  
563 (Lys-C, Fujifilm WakoPure Chemical Corporation) was added (1 $\mu$ L/sample) and  
564 samples incubated at 37°C for 3 hours. Samples were diluted 1/5 by addition of  
565 200uL Mass Spec grade water, and 1ug trypsin (Fujifilm WakoPure Chemical  
566 Corporation) was added to each sample. Samples were incubated at 37°C with hard  
567 shaking overnight.

568 Samples were acidified with 1% TFA and centrifuged at 13,000 rpm, for 10  
569 minutes at room temperature. Sample was applied to a double layer Empore C18  
570 Extraction Disk (3M) prepared with methanol. Membrane was washed twice with  
571 0.1% TFA and protein was eluted with elution buffer (50% ACN, 0.05% TFA), dried  
572 using a CentriVap Concentrator (Labconco) and resuspended in 15uL 0.1% TFA.  
573 Protein concentration was determined by absorption at 280nm on a Nanodrop 1000,  
574 then 2  $\mu$ g of de-salted peptides were loaded onto a 50 cm emitter packed with 1.9  
575  $\mu$ m ReproSil-Pur 200 C18-AQ (Dr Maisch, Germany) using a RSLC-nano uHPLC  
576 systems connected to a Fusion Lumos mass spectrometer (both Thermo, UK).  
577 Peptides were separated by a 140 min linear gradient from 5% to 30% acetonitrile,  
578 0.5% acetic acid. The mass spectrometer was operated in DIA mode, acquiring a  
579 MS 350-1650 Da at 120k resolution followed by MS/MS on 45 windows with 0.5 Da  
580 overlap (200-2000 Da) at 30k with a NCE setting of 27. Raw files were analysed and  
581 quantified using Spectronaut 15 (Biognosis, Switzerland) using directDIA against the  
582 Uniprot Mus Musculus database with the default settings. Ratios and statistical tests  
583 were determined by the Spectronaut pipeline using default settings.

584

### 585 **Flow Cytometry**

586 For cultured adherent cells, single cell suspensions were first generated using  
587 trypsin (MEFs) or accutase (Neural Stem Cells). For haematopoietic cells, samples  
588 were prepared from single-cell suspensions of bone marrow and thymus. Samples

589 were incubated with fluorescently-conjugated antibodies against cell surface markers  
590 (Table S2) and Fixable Viability Dye (eBioscience, 65-0865-14, 1 in 200 dilution)  
591 diluted in Flow Cytometry Staining Buffer (eBioscience, 00-4222-26) (20 minutes at 4  
592 °C). Samples were then washed in a 10-fold volume of Flow Cytometry Staining  
593 Buffer before centrifugation at 300 g for 5 minutes at 4°C. Pellets were resuspended  
594 in Cytofix/Cytoperm solution (BD Bioscience, 554722) following manufacturer's  
595 instructions and washed in Perm/Wash buffer (BD Bioscience, 554723). If required,  
596 samples were incubated with fluorescently conjugated antibodies against  
597 intracellular markers for 20 minutes at room temperature. For intracellular  $\gamma$ H2AX  
598 staining, samples were further permeabilised by resuspending in Perm/Wash buffer  
599 (1 mL) for 15 minutes at 4 °C before antibody incubation. After intracellular antibody  
600 incubation, all stained samples were then washed in Perm/Wash buffer (300 g/ 5  
601 minutes/ 4 °C). Cell Trace Yellow (Thermo Fisher C34567) experiments were  
602 conducted according to the manufacturer's protocol. Samples were resuspended in  
603 DAPI staining solution (1  $\mu$ g/mL DAPI in PBS). DAPI-stained samples were  
604 incubated on ice for at least 15 minutes before data acquisition.

605 Data acquisition (BD LSRFortessa) was performed no more than 24 hours  
606 following sample preparation. Identical laser power was used to quantify Clover  
607 signal across all experiments. Data analysis was conducted using FlowJo software  
608 (Treestar). Cellular debris/aggregates were excluded using strict forward- and side-  
609 scatter gating strategies. Cell cycle stages were gated based on DNA content (DAPI)  
610 fluorescence. Wild-type samples lacking Clover expression were processed and  
611 stained in parallel to transgenic samples. To correct for autofluorescence,  
612 background fluorescence was measured for each cell population from wild-type  
613 samples, and then subtracted from transgenic fluorescence values. To generate  
614 boxplots, the background-corrected fluorescence value from each of >1000 cells was  
615 expressed relative to the mean of the vehicle only condition. We focused exclusively  
616 on S/G2/M cells, gated on DNA content, for quantifications to avoid the confounding  
617 effects of quiescent cells, where condensins are expressed at very low levels.

618

619 **Primary cell culture:**

620 **Thymic & Bone Marrow *ex vivo* cultures:**

621 Single cell suspensions of thymus tissue were generated by gentle dissociation of  
622 whole thymus tissue through 40  $\mu\text{m}$  filters (Fisherbrand, 22-363-547) into PBS. For  
623 bone marrow, tissue was flushed out of tibia and femur bones with PBS before  
624 dissociation through a 40  $\mu\text{m}$  filter. Cell numbers were counted manually using a  
625 haemocytometer. Cells ( $1\text{-}2.5 \times 10^6/\text{mL}$ ) were then cultured at 37 °C *ex vivo* for 2-6  
626 hours in RPMI (Gibco, 21875-034) containing 10% FCS (IGC Technical Services)  
627 and penicillin (70 mg/L, IGC Technical Services) and streptomycin (130 mg/L, IGC  
628 Technical Services). For bone marrow cultures, different cell lineages were cultured  
629 together and then B cell and erythroid lineages were identified based on flow  
630 cytometric detection of cell surface marker expression (CD19 and Ter119,  
631 respectively) and analysed separately.

632

### 633 **Peripheral T and B lymphocyte *ex vivo* cultures**

634 Peripheral T and B lymphocytes were derived from spleens dissected from adult  
635 animals. Single cell suspensions of splenic tissue were generated by gentle  
636 dissociation of whole spleen through 40  $\mu\text{m}$  filters (Fisherbrand, 22-363-547).  
637 Splenic cells were resuspended in MACS buffer (0.5% BSA (Sigma), 1 mM EDTA in  
638 PBS – 40  $\mu\text{L}$  MACS Buffer per  $10 \times 10^7$  cells) in preparation for Magnetic Activated  
639 Cell Sorting. Peripheral T- and B-cells were isolated from whole spleen using Pan T  
640 Cell (Miltenyi Biotec, 130-095-130) or Pan B Cell (Miltenyi Biotec, 130-104-433)  
641 isolation kits, respectively, according to the manufacturer's instructions.

642

643 Isolated peripheral T- and B-cells were cultured at a density of  $0.5 \times 10^6$  cells/mL, in  
644 RPMI media (Gibco, 21875-034) supplemented with 10% FCS (IGC Technical  
645 Services), penicillin (70 mg/L, IGC Technical Services), streptomycin (130 mg/L, IGC  
646 Technical Services), 2 mM L-Glutamine (IGC Technical Services), 1mM sodium  
647 pyruvate (Sigma-Aldrich, S8363), 50  $\mu\text{M}$   $\beta$ -mercaptoethanol (Gibco, 31350-010) and  
648 1x Non Essential Amino Acids (Sigma-Aldrich, M7145) at 37 °C. To stimulate cells,  
649 T-cells were additionally cultured with 30 U/mL IL-2 (Peprotech, 212-12) and 1  
650  $\mu\text{L}/\text{mL}$  Mouse T-Activator Dynabeads (Gibco, 11452D), whilst B-cells were cultured  
651 with 10 ng/mL IL-4 (Peprotech, 214-14) and 5  $\mu\text{g}/\text{mL}$  LPS (Sigma, L4391). Cells  
652 were allowed to proliferate for 48 hours prior to any auxin/BrdU treatments.

653

## 654 **MEFs**

655 MEFs were derived from E13.5/E14.5 embryos. Head and organs were removed,  
656 and the embryonic body was homogenized with a sterile razor blade. 1 mL 1X  
657 Trypsin (Sigma-Aldrich, T4174) in PBS was added per 3 embryos and the mixture  
658 was incubated at 37 °C for 10 minutes. Tissue was further homogenized by passage  
659 through a 23G needle approximately 20 times. Homogenous tissue was then  
660 resuspended in MEF media (Standard DMEM (Gibco, 41965-039) with 15% FCS  
661 (IGC Technical Services), penicillin (70 mg/L) and streptomycin (65 mg/L), 2 mM L-  
662 Glutamine (IGC Technical Services), 1mM sodium pyruvate (Sigma-Aldrich, S8363),  
663 50 µM β-mercaptoethanol (Gibco, 31350-010), 1x Non Essential Amino Acids  
664 (Sigma-Aldrich, M7145)) and passed through a 40 µm filter to remove non-  
665 homogenised tissue. MEFs were then cultured in a T75 flask (per 3 embryos) at 37  
666 °C, 5% CO<sub>2</sub>, and 3% O<sub>2</sub>.

667

## 668 **Neural Stem Cells**

669 SC lines were derived from the telencephalon of individual E13.5 or  
670 E15.5 embryos following a previously described protocol <sup>49</sup>.  
671 Once stably propagating, NSCs were cultured in T75 flasks. When  
672 passaging, NSCs were washed with Wash Media (WM) (DMEM/Ham's F-12  
673 media with l-Glutamine (Sigma-Aldrich, D8437-500), 300 mM D-(+)-  
674 Glucose solution (Sigma-Aldrich, G8644), 1X MEM Non-Essential Amino  
675 Acids Solution (Gibco, 11140050), 4.5 mM HEPES (Gibco, 15630056), 75  
676 mg/mL BSA solution, 50 µM β-mercaptoethanol (Gibco, 31350-010),  
677 penicillin (70 mg/L, IGC Technical Services) and streptomycin (130 mg/L,  
678 IGC Technical Services)) and propagated in Complete Media (CM) (WM  
679 supplemented with Epidermal Growth Factor (EGF) (PeproTech, 315-09)  
680 and Recombinant Human FGF-basic (FGF) (PeproTech, 100-18B) each to  
681 final concentration of 10 ng/ml, 1 µg/mL Laminin (Trevigen, 3446-005-01),  
682 2.5 mL N-2 Supplement (100X) (Gibco, 17502048) and 5 mL B27  
683 Supplement (50X) (Gibco, 17504044)). Cells were cultured at 37 °C, 5%  
684 CO<sub>2</sub> and passaged every 2-3 days.

685

## 686 **Auxin treatment**

### 687 Cell Culture

688 Indole-3-acetic acid (auxin, MP Biomedicals, 102037) was solubilised in DMSO to  
689 give a 500 mM stock solution. This stock solution was then diluted in the cell media  
690 of choice to give a solution of desired concentration before being filter-sterilised  
691 through a 0.22 µm filter (Starlab, E4780-1226). A DMSO-only treated sample was  
692 always processed alongside any auxin treated sample.

693

#### 694 *in vivo*

695 Indole-3-acetic acid powder (125 mg) was dissolved in 1 mL PBS (Sigma-Aldrich,  
696 D8537), with small quantities of NaOH (IGC Technical Services, 5 M, 140 µL) added  
697 to help solubilise the drug. The solubilised drug was then added to 2.4 mL PBS, with  
698 minute volumes of HCl (5 M, Fisher, H/1150/PB17) added until solution pH reached  
699 7.4. In order to achieve a more physiological osmolarity, the drug mixture was diluted  
700 to 10 mL in MQ water (final osmolarity range of ~355 - 380 mOsm/L; concentration =  
701 71.4 mM). Vehicle injection mixture was prepared by adding 10 µL of both NaOH  
702 (5M) and HCl (5M) to 10 mL PBS (final osmolarity of 326 mOsm/L).

703

704 Both vehicle and auxin injection mixtures were filter-sterilised through 0.22 µm filters  
705 prior to injection. Sterile auxin solution was then administered to animals via  
706 intraperitoneal injection. Auxin injection volume was adjusted based on animal  
707 weight so that each animal received 100 mg of auxin per kg of body weight. Animals  
708 were culled using a schedule 1 approved method at appropriate timepoints, and  
709 tissues of interest were dissected and stored briefly on ice until further processing.

710

#### 711 **BrdU Pulse Chase Assay**

712 A 10 mM stock of BrdU was firstly generated by dissolving 0.0031 g BrdU powder  
713 (Sigma-Aldrich, B5002) in 1 mL PBS. Samples were firstly pre-depleted of  
714 Ncaph/Ncaph2 using auxin (500 µM) for 2-3 hours, before being pulsed with BrdU  
715 (final concentration = 10 µM) for 30 minutes at 37 °C. BrdU was washed out by firstly  
716 pelleting cells via centrifugation (300 g, 5 minutes) before washing once in media,  
717 and then pelleting samples again. Samples were then split in two, with half of the  
718 sample placed on ice for assessment of degradation efficiency at the beginning of  
719 the chase (0h time-point in Figure S3C). The other half of the sample was  
720 resuspended in pre-warmed auxin-containing media before being incubated at 37 °C  
721 for a further 3.5 hours. All samples were rinsed in PBS and pelleted after their

722 incubations were complete and stained with Fixable Viability Dye (eBioscience, 65-  
723 0865-14, 1 in 200 dilution), and/or fluorescent surface markers if required (20  
724 minutes/ 4 °C), before being washed in 2 mL FCSB. To quantify the efficiency of  
725 auxin-induced depletion (Figure S3C), a small portion of each sample was taken at  
726 the start (0h) and end (3.5h) of the chase and analysed on the LSRFortessa.  
727 Degradation was calculated as described in the 'Flow Cytometry' section. Following  
728 the chase, the majority of each sample was then resuspended and fixed in  
729 Cytofix/Cytoperm solution (100 µL/sample, BD Bioscience, 554722) following  
730 manufacturer's instructions and washed in Perm/Wash buffer (2 mL/sample, BD  
731 Bioscience, 554723) before being resuspended in 0.5 mL FCSB and left overnight at  
732 4 °C.

733

734 Samples were pelleted and resuspended in Cytoperm Permeabilisation Buffer Plus  
735 (BD Bioscience, 561651) following manufacturer's instruction, before being washed  
736 in 2 mL Perm/Wash buffer. Cytofix/Cytoperm solution (100 µL/sample) was used to  
737 re-fix samples for 5 minutes at 4 °C before samples were again washed in 2 mL  
738 Perm/Wash buffer. DNase I solution (eBioscience, 00-4425-10 – part of BrdU  
739 Staining Kit for Flow Cytometry, 8817-6600-42) was diluted following manufacturer's  
740 instruction. Each sample was resuspended in 100 µL diluted DNase I and incubated  
741 at 37 °C for 1 hour to expose the BrdU epitope. Samples were washed in 2 mL  
742 Perm/Wash solution, before being incubated with AlexaFluor-647-conjugated anti-  
743 BrdU monoclonal antibody (Invitrogen, B35140, 1 in 20 dilution in Perm/Wash, 20  
744 minute incubation at room temperature). Perm/Wash (2 mL per sample) was used to  
745 wash samples. To stain for DNA content, each sample was resuspended in 20 µL 7-  
746 AAD (BD Biosciences, 559925) for at least 15 minutes before samples were finally  
747 diluted in 0.5 mL PBS. Samples were all analysed on the LSRFortessa as above.

748

#### 749 **Immunofluorescence on tissue cryosections**

750 Tissues were dissected immediately *post-mortem* then washed in ice cold PBS, fixed  
751 for 24 hours (small intestine) or 2 hours (E10.5 embryos) in 4% PFA in PBS, then  
752 passed through 10 and 30% sucrose in PBS solutions, and mounted in OCT (Tissue-  
753 Tek). 20µm sections were cut on a Leica CM1850 and adhered to Superfrost Plus  
754 slides (Epremedia). Sections were post-fixed in 4% PFA in PBS for 10 minutes at room  
755 temperature, then permeabilised in 0.5% Triton X-1000 for 5 minutes at room



756 temperature, and washed twice in 0.2% Triton X-1000 for 5 minutes at room  
757 temperature. Sections were then blocked in 4% BSA in PBS for 1 hour (small  
758 intestine) or 2 hours (E10.5 embryo) at room temperature, and primary antibodies  
759 were diluted in 4% BSA in PBS and applied overnight at 4C. Sections were washed  
760 three times in 0.2% Triton X-1000, and secondary antibodies were diluted in 4% BSA  
761 in PBS and applied at room temperature for 2 hours. Sections were then washed as  
762 previously, stained with DAPI at 1µg/mL, and mounted in Vectashield (Vector Labs).  
763 To reduce autofluorescence, staining of small intestine sections also included an  
764 additional treatment with 0.1% Sudan Black in 70% ethanol at room temperature for  
765 20 minutes immediately prior to DAPI stain and mounting.

766

### 767 **Image Capture and Analysis**

768 Images of small intestine sections were acquired at 100X magnification using a  
769 Photometrics Coolsnap HQ2 CCD camera and a Zeiss AxioImager A1 fluorescence  
770 microscope with a Plan Aplanachromat 100x 1.4NA objective, a Nikon Intensilight  
771 Mercury based light source (Nikon UK Ltd, Kingston-on-Thames, UK ) and either  
772 Chroma #89014ET (3 colour) or #89000ET (4 colour) single excitation and emission  
773 filters (Chroma Technology Corp., Rockingham, VT) with the excitation and emission  
774 filters installed in Prior motorised filter wheels. A piezoelectrically driven objective  
775 mount (PIFOC model P-721, Physik Instrumente GmbH & Co, Karlsruhe) was used  
776 to control movement in the z dimension. Hardware control and image capture were  
777 performed using Nikon Nis-Elements software (Nikon UK Ltd, Kingston-on-Thames,  
778 UK). Deconvolution of 3D data was performed in Nis-Elements (Richardson Lucy, 20  
779 iterations). 3D datasets were visualised and analysed for fluorescence intensity  
780 using Imaris V9.5 (Bitplane, Oxford Instruments, UK). DNA volume was calculated  
781 by manually rendering a surface around the DAPI signal in pH3S10<sup>+</sup> cells within  
782 Imaris, and immunofluorescence signal was calculated from mean voxel intensity  
783 within that surface. The percentage protein remaining following IAA treatment was  
784 calculated by setting the mean voxel intensity measured in pH3S10<sup>+</sup> cells from  
785 negative control (e.g. *Ncaph*<sup>+/+</sup> *Ncaph2*<sup>+/+</sup>) sections to 0%, and the mean voxel  
786 intensity from vehicle-treated sections to 100%.

787 Images of embryonic whole-mount cryosections were acquired in 2D using a Zeiss  
788 Axioscan Z1 with a Plan-Apochomat 40x 0.95Korr M27 objective and an AxioCam  
789 506 camera using DAPI channel as focus. Images were acquired in Zen 3.1

790 software, and analysed using QuPath 0.3.0<sup>50</sup>. 5 regions per embryo were selected  
791 based on lineage marker staining (Cdh1, Pdgfr), and mean pixel intensity was  
792 calculated in the 647 channel, corresponding to Ncaph-AID:Clover detected with an  
793 anti-GFP-647 nanobooster. The percentage protein remaining value was then  
794 calculated as described for small intestine sections.

795

## 796 **Acknowledgements**

797 We thank the University of Edinburgh Transgenic Facility for performing CRISPR  
798 microinjections to generate AID:Clover-tagged mouse lines, the Biological Research  
799 Facility at the Western General Hospital for animal husbandry, the IGC Flow  
800 Cytometry Facility, IGC Advanced Imaging Resource and IGC Mass Spectrometry  
801 facility for technical support. We acknowledge technical support from the Model  
802 Production Core staff led by M. Gertsenstein at the Centre for Phenogenomics for  
803 generating the TIR1 knock-in mouse lines and Eszter Posfai (Princeton University)  
804 for early collaboration efforts the proof of principle studies of AID in mouse embryos;  
805 We are grateful to Luke Boulter for antibodies and advice on whole mount  
806 immunofluorescence, and to Wendy Bickmore for comments on the manuscript. We  
807 also acknowledge Masato Kanemaki and co-workers for their pioneering efforts to  
808 develop the auxin-inducible degron system. Requests for the Rosa26<sup>Tir1</sup> transgenic  
809 mouse line should be addressed to Bin Gu ([guibin1@msu.edu](mailto:guibin1@msu.edu)), and requests for the  
810 Ncaph- and Ncaph2-AID:Clover lines should be addressed to Andrew Wood  
811 ([Andrew.j.wood@ed.ac.uk](mailto:Andrew.j.wood@ed.ac.uk)). This work was supported by a Sir Henry Dale Fellowship  
812 from the Wellcome Trust (AW 102560/Z/13/Z), an MRC Unit award to the MRC  
813 Human Genetics Unit, and Funding from CIHR (JR FDN-143334).

814

## 815 **Author contributions**

816 **L.M.** Led the development and validation of the two AID:Clover alleles, the primary  
817 cell work in Figures 1 – 5, S1, S2 and S3 of the manuscript, and supported GT in  
818 work shown in Figure 6, S4 and S5.

819 **G.T.** Led the *in vivo* work in Figures 6, S4 and S5, of the manuscript, supported L.M.  
820 in developing the two AID:Clover alleles and in work for Figures 1 and 2 and S1.

821 **J.B.** Performed the Neural Stem Cell experiments in Figure 2 and the Cell Trace  
822 experiments in Figure S3.

823 **E.C.** Performed the whole mount immunofluorescence experiments in Figure 6,  
824 supervised by G.T.

825 **L.S.** performed immunofluorescence on MEFs shown in Figure 1.

826 A.K. captured and analysed the mass spectrometry data using samples provided by  
827 G.T.

828 **J.R.** conceived the study to develop TIR1 knock-in mouse lines; Provided  
829 supervision and funding for generating the Tir1 lines.

830 **B.G.** conceived the study to develop TIR1 knock-in mouse lines; designed and  
831 generated the TIR1 knock-in mouse lines.

832 **A.W.** conceived and designed the Ncaph- and Ncaph2-knockin lines, conceived,  
833 supervised and provided funding for all of the experimental work in the paper other  
834 than developing the TIR1 knockin mouse line, and wrote the paper with input from  
835 B.G, J.R, L.M and G.T.

836

### 837 **Competing Financial Interest**

838 The authors declare no competing financial interests.

839

## 840 References

- 841 1. Kos, C. H. Cre/loxP system for generating tissue-specific knockout mouse  
842 models. *Nutr Rev* **62**, 243–246 (2004).
- 843 2. Nishimura, K., Fukagawa, T., Takisawa, H., Kakimoto, T. & Kanemaki, M. An  
844 auxin-based degron system for the rapid depletion of proteins in nonplant cells.  
845 *Nat Meth* **6**, 917–922 (2009).
- 846 3. Natsume, T. & Kanemaki, M. T. Conditional Degrons for Controlling Protein  
847 Expression at the Protein Level. *Annu. Rev. Genet.* **51**, 83–102 (2017).
- 848 4. Tan, X. *et al.* Mechanism of auxin perception by the TIR1 ubiquitin ligase.  
849 *Nature* **446**, 640–645 (2007).
- 850 5. Natsume, T., Kiyomitsu, T., Saga, Y. & Kanemaki, M. T. Rapid Protein  
851 Depletion in Human Cells by Auxin-Inducible Degron Tagging with Short  
852 Homology Donors. *Cell Reports* **15**, 210–218 (2016).
- 853 6. Nora, E. P. *et al.* Targeted Degradation of CTCF Decouples Local Insulation of  
854 Chromosome Domains from Genomic Compartmentalization. *Cell* **169**, 930–  
855 944.e22 (2017).
- 856 7. Morawska, M. & Ulrich, H. D. An expanded tool kit for the auxin-inducible  
857 degron system in budding yeast. *Yeast* **30**, 341–351 (2013).
- 858 8. Nabet, B. *et al.* The dTAG system for immediate and target-specific protein  
859 degradation. *Nat. Chem. Biol.* **14**, 431–441 (2018).
- 860 9. Nabet, B. *et al.* Rapid and direct control of target protein levels with VHL-  
861 recruiting dTAG molecules. *Nat Comms* **11**, 4687–8 (2020).
- 862 10. Buckley, D. L. *et al.* HaloPROTACS: Use of Small Molecule PROTACs to  
863 Induce Degradation of HaloTag Fusion Proteins. *ACS Chem Biol* **10**, 1831–  
864 1837 (2015).
- 865 11. Boija, A. *et al.* Transcription Factors Activate Genes through the Phase-  
866 Separation Capacity of Their Activation Domains. *Cell* **175**, 1842–1855.e16  
867 (2018).
- 868 12. Narita, T. *et al.* Enhancers are activated by p300/CBP activity-dependent PIC  
869 assembly, RNAPII recruitment, and pause release. *Molecular Cell* **81**, 2166–  
870 2182.e6 (2021).
- 871 13. Gibcus, J. H. *et al.* A pathway for mitotic chromosome formation. *Science* **359**,  
872 eaa06135 (2018).
- 873 14. Hégarat, N. *et al.* Cyclin A triggers Mitosis either via the Greatwall kinase  
874 pathway or Cyclin B. *The EMBO Journal* **39**, e104419 (2020).
- 875 15. Gu, B., Posfai, E. & Rossant, J. Efficient generation of targeted large insertions  
876 by microinjection into two-cell-stage mouse embryos. *Nat Biotechnol* **36**, 632–  
877 637 (2018).
- 878 16. Yesbolatova, A. *et al.* The auxin-inducible degron 2 technology provides sharp  
879 degradation control in yeast, mammalian cells, and mice. *Nat Comms* **11**,  
880 5701–13 (2020).
- 881 17. Ono, T. *et al.* Differential Contributions of Condensin I and Condensin II to  
882 Mitotic Chromosome Architecture in Vertebrate Cells. *Cell* **115**, 109–121  
883 (2003).
- 884 18. Terakawa, T. *et al.* The condensin complex is a mechanochemical motor that  
885 translocates along DNA. *Science* (2017). doi:10.1126/science.aan6516
- 886 19. Takagi, M. *et al.* Ki-67 and condensins support the integrity of mitotic  
887 chromosomes through distinct mechanisms. *Journal of Cell Science* **131**,  
888 jcs212092 (2018).
- 889 20. Samejima, K. *et al.* Functional analysis after rapid degradation of condensins

- 890 and 3D-EM reveals chromatin volume is uncoupled from chromosome  
891 architecture in mitosis. *Journal of Cell Science* **131**, jcs210187 (2018).
- 892 21. Miura, H., Quadros, R. M., Gurumurthy, C. B. & Ohtsuka, M. Easi-CRISPR for  
893 creating knock-in and conditional knockout mouse models using long ssDNA  
894 donors. *Nat Protoc* **13**, 195–215 (2018).
- 895 22. Quadros, R. M. *et al.* Easi-CRISPR: a robust method for one-step generation  
896 of mice carrying conditional and insertion alleles using long ssDNA donors and  
897 CRISPR ribonucleoproteins. *Genome Biol.* **18**, 92–15 (2017).
- 898 23. Nishide, K. & Hirano, T. Overlapping and Non-overlapping Functions of  
899 Condensins I and II in Neural Stem Cell Divisions. *PLoS Genet* **10**, e1004847  
900 (2014).
- 901 24. Houlard, M. *et al.* Condensin confers the longitudinal rigidity of chromosomes.  
902 *Nat Cell Biol* **17**, 771–781 (2015).
- 903 25. Walther, N. *et al.* A quantitative map of human Condensins provides new  
904 insights into mitotic chromosome architecture. *The Journal of Cell Biology*  
905 jcb.201801048 (2018). doi:10.1083/jcb.201801048
- 906 26. Gu, B., Posfai, E., Gertsenstein, M. & Rossant, J. Efficient Generation of  
907 Large-Fragment Knock-In Mouse Models Using 2-Cell (2C)-Homologous  
908 Recombination (HR)-CRISPR. *Curr Protoc Mouse Biol* **10**, e67 (2020).
- 909 27. Sathyan, K. M. *et al.* An improved auxin-inducible degron system preserves  
910 native protein levels and enables rapid and specific protein depletion. *Genes &*  
911 *Development* **33**, 1441–1455 (2019).
- 912 28. Mendoza-Ochoa, G. I. *et al.* A fast and tuneable auxin-inducible degron for  
913 depletion of target proteins in budding yeast. *Yeast* **36**, 75–81 (2019).
- 914 29. Smith, E. D. *et al.* More than blood, a Novel Gene Required for Mammalian  
915 Postimplantation Development. *Molecular and Cellular Biology* **24**, 1168–1173  
916 (2004).
- 917 30. Kreslavsky, T. *et al.*  $\beta$ -Selection-Induced Proliferation Is Required for  $\alpha\beta$  T Cell  
918 Differentiation. *Immunity* **37**, 840–853 (2012).
- 919 31. Hocquet, C. *et al.* Condensin controls cellular RNA levels through the accurate  
920 segregation of chromosomes instead of directly regulating transcription. *eLife*  
921 **7**, (2018).
- 922 32. Hirano, T., Kobayashi, R. & Hirano, M. Condensins, chromosome  
923 condensation protein complexes containing XCAP-C, XCAP-E and a Xenopus  
924 homolog of the Drosophila Barren protein. *Cell* **89**, 511–521 (1997).
- 925 33. Ganji, M. *et al.* Real-time imaging of DNA loop extrusion by condensin.  
926 *Science* eaar7831 (2018). doi:10.1126/science.aar7831
- 927 34. Rawlings, J. S., Gatzka, M., Thomas, P. G. & Ihle, J. N. Chromatin  
928 condensation via the condensin II complex is required for peripheral T-cell  
929 quiescence. *The EMBO Journal* **30**, 263–276 (2010).
- 930 35. Swygert, S. G. *et al.* Condensin-Dependent Chromatin Compaction Represses  
931 Transcription Globally during Quiescence. *Molecular Cell* (2018).  
932 doi:10.1016/j.molcel.2018.11.020
- 933 36. Downen, J. M. *et al.* Multiple structural maintenance of chromosome complexes  
934 at transcriptional regulatory elements. *Stem Cell Reports* **1**, 371–378 (2013).
- 935 37. Wu, S. *et al.* ARID1A spatially partitions interphase chromosomes. *Sci Adv* **5**,  
936 eaaw5294 (2019).
- 937 38. Gosling, K. M. *et al.* A mutation in a chromosome condensin II subunit, kleisin  
938  $\beta$ , specifically disrupts T cell development. *Proceedings of the National*  
939 *Academy of Sciences* **104**, 12445–12450 (2007).

- 940 39. Woodward, J. *et al.* Condensin II mutation causes T-cell lymphoma through  
941 tissue-specific genome instability. *Genes & Development* **30**, 2173–2186  
942 (2016).
- 943 40. Martin, C.-A. *et al.* Mutations in genes encoding condensin complex proteins  
944 cause microcephaly through decatenation failure at mitosis. *Genes &*  
945 *Development* **30**, 2158–2172 (2016).
- 946 41. Elbatsh, A. M. O. *et al.* Distinct Roles for Condensin's Two ATPase Sites in  
947 Chromosome Condensation. *Molecular Cell* **76**, 724–737.e5 (2019).
- 948 42. Heintel, D. *et al.* High expression of cereblon (CRBN) is associated with  
949 improved clinical response in patients with multiple myeloma treated with  
950 lenalidomide and dexamethasone. *Br J Haematol* **161**, 695–700 (2013).
- 951 43. Abuhashem, A. & Hadjantonakis, A.-K. Rapid and efficient adaptation of the  
952 dTAG system in mammalian development reveals stage specific requirements  
953 of NELF. *bioRxiv* 2021.11.30.470581 (2021).
- 954 44. Ashley, G. E. *et al.* An expanded auxin-inducible degron toolkit for  
955 *Caenorhabditis elegans*. *Genetics* **217**, (2021).
- 956 45. Zhang, L., Ward, J. D., Cheng, Z. & Dernburg, A. F. The auxin-inducible  
957 degradation (AID) system enables versatile conditional protein depletion in *C.*  
958 *elegans*. *Development* **142**, 4374–4384 (2015).
- 959 46. Lam, A. J. *et al.* Improving FRET dynamic range with bright green and red  
960 fluorescent proteins. *Nat Meth* **9**, 1005–1012 (2012).
- 961 47. Holland, A. J., Fachinetti, D., Han, J. S. & Cleveland, D. W. Inducible,  
962 reversible system for the rapid and complete degradation of proteins in  
963 mammalian cells. *Proc. Natl. Acad. Sci. U.S.A.* **109**, E3350–7 (2012).
- 964 48. Chu, V. T. *et al.* Efficient generation of Rosa26 knock-in mice using  
965 CRISPR/Cas9 in C57BL/6 zygotes. *BMC Biotechnol.* **16**, 4 (2016).
- 966 49. Pollard, S. M. In vitro expansion of fetal neural progenitors as adherent cell  
967 lines. *Methods Mol. Biol.* **1059**, 13–24 (2013).
- 968 50. Bankhead, P. *et al.* QuPath: Open source software for digital pathology image  
969 analysis. *Sci. Rep.* **7**, 16878–7 (2017).

971

972

## 973 **Figure Legends**

974

### 975 **Figure 1: Mouse models for auxin-inducible degradation of condensin proteins**

976 **A.** Schematic diagrams showing the subunit composition of condensin I and II complexes  
977 with C-terminal AID:Clover. The kleisin subunits of condensin I and II are Ncaph and  
978 Ncaph2, respectively. **B.** CRISPR-Cas9 strategy for integrating mClover cassettes at the  
979 Ncaph and Ncaph2 loci using long single stranded deoxyoligonucleotides (ssODN) to  
980 generate *Ncaph*<sup>AID:Clover</sup> and *Ncaph2*<sup>AID:Clover</sup> alleles. Full details and sequences for the  
981 integrated cassettes are given in Appendix S1. **C.** Western blots prepared from thymic whole  
982 cell protein extract were probed with antibodies recognising endogenous Ncaph or Ncaph2,  
983 with tubulin as a loading control. '+' indicates wildtype allele, 'tag' indicates AID:Clover. **D.**  
984 Immunofluorescence imaging of mitotic murine embryonic fibroblast lines derived from  
985 *Ncaph*<sup>AID:Clover/AID:Clover</sup> and *Ncaph2*<sup>AID:Clover/AID:Clover</sup> embryos. Scale bar = 5  $\mu$ m. **E.** Schematic  
986 diagram showing the *Rosa26*<sup>Tir1</sup> allele. Details on how this allele was generated are in Figure  
987 S1D and the materials and methods. **F.** Breeding scheme to combine endogenously-tagged  
988 *Ncaph* and *Ncaph2* alleles with *Rosa26*<sup>Tir1</sup>. **G.** Clover fluorescence was measured by flow  
989 cytometry in primary S/G2/M thymocytes (gated on DNA content, n > 1000 cells/sample)  
990 from mice homozygous for AID:Clover-tagged target proteins, in combination with 0, 1 or 2  
991 alleles of the *Rosa26*<sup>Tir1</sup> transgene. Cells were not subjected to IAA treatment. Boxplots  
992 show background-corrected mean fluorescence values from (n) biological replicate samples.  
993 \* indicates a significant (p<0.05) difference between genotypes (one-way ANOVA with  
994 Tukey HSD test, p < 0.05). NS: not significant.

995

### 996 **Figure S1: Supplement to Figure 1**

997 **A.** Observed and expected genotype frequencies among 28 day-old animals generated from  
998 heterozygous crosses for each AID:Clover transgene (tag). Chi-squared tests revealed no significant  
999 deviation from expected mendelian frequencies. **B.** Litter sizes from matings between animals  
1000 heterozygous versus homozygous for each AID:Clover transgene. \* indicates significant difference at  
1001  $p < 1 \times 10^{-3}$  from unpaired two-tailed t-tests **C.** Weight of pups at 28 days post-partum from crosses  
1002 between parents heterozygous for the AID:Clover transgene (tag/+). M = male, F = female. \*  
1003 indicates significant differences between genotypes at  $p < 0.01$ , \*\* at  $p < 0.05$  from one-way ANOVA  
1004 with Tukey's HSD posthoc test. **D.** Schematic illustrating the derivation of *Rosa26*<sup>Tir1</sup> via a *Rosa26*<sup>LSL-</sup>  
1005 *Tir1* intermediate. Breeding of *Rosa26*<sup>pCAG-LSL</sup> mice to pCX-NLS-cre caused germline deletion of the  
1006 lox-stop-lox cassette to produce *Rosa26*<sup>Tir1</sup>. **E.** Western blots of whole tissue extracts from  
1007 *Rosa26*<sup>Tir1/Tir1</sup> or *Rosa26*<sup>+/+</sup> animals, probed with an anti-myc tag antibody (9B11). **F.** Observed and  
1008 expected genotype frequencies among 28 day-old animals generated from crosses between parents  
1009 homozygous for either *Ncaph*- or *Ncaph2*<sup>AID:Clover</sup> and heterozygous for *Rosa26*<sup>OsTir1</sup>. Chi-squared  
1010 tests revealed no significant deviation from expected mendelian frequencies of *Rosa26* genotypes  
1011 in the *Ncaph* background, and elevated frequencies of *Rosa26*<sup>Tir1</sup> homozygotes in the *Ncaph2*  
1012 background. **G.** Litter sizes from any mating involving a male (M) or female (F) carrying *Rosa26*<sup>Tir1</sup>  
1013 and either *Ncaph*- or *Ncaph2*<sup>AID:Clover</sup> alleles in the homozygous state, in combination with animals of  
1014 various genotype. Because genotypes of the other animal in each mating differed between  
1015 conditions, these data show simply that breeding from double homozygous transgenic mice is  
1016 possible and are not suitable to quantify fertility across conditions. **H.** Weight of pups at 28 days  
1017 post-partum. Differences between *Tir1* genotypes were not significant at  $p < 0.05$  in one-way  
1018 ANOVA tests. M = male, F = female.

1019

### 1020 **Figure 2: Rapid and titratable degradation of endogenous Ncaph and Ncaph2 in**

1021 **primary cells**  
1022 **A.** Schematic illustration of experiments designed to test targeted degradation of condensin  
1023 subunits in primary cells. **B.** Western blots prepared from thymus whole cell extract and  
1024 probed with polyclonal antibodies against Ncaph, Ncaph2, or a Gapdh loading control.  
1025 Robust tag-dependent degradation of target proteins is clearly evident after 3 hours of auxin  
1026 treatment. **C & D.** Boxplots quantify the extent of targeted protein depletion following IAA  
1027 treatment (500 $\mu$ M for 3 hours), measured by flow cytometry in primary CD8<sup>+</sup> thymocytes (C)  
1028 and embryonic fibroblasts (D). n = 3 biological replicates from at least 2 independent

1029 experiments, with degradation measured in over 1000 S/G2/M cells in each case. To  
1030 calculate % protein remaining, the background corrected fluorescence value of each cell was  
1031 expressed as a percentage of the mean fluorescence value for all cells in the vehicle-only  
1032 condition. Boxes show the boundaries of upper and lower quartiles and whiskers show the  
1033 range. Where negative values were observed (e.g. in MEFs due to variable  
1034 autofluorescence between lines), a value of 0% was assigned. **E.** Titration of target protein  
1035 levels in primary neural stem cells treated with different IAA concentrations for 2 hours.  
1036 Boxplots were generated as described for panels C&D.

1037

### 1038 **Figure 3: Tir1 dosage determines degradation kinetics of AID-tagged proteins.**

1039 **A.** Schematic diagram illustrates the assembly of the Tir1 substrate receptor protein, IAA  
1040 ligand and AID tagged target protein-of-interest into a ternary complex necessary for target  
1041 protein ubiquitination via SCF<sup>Tir1</sup>, and degradation. **B & C.** Histograms show the distribution  
1042 of Clover expression levels, measured by flow cytometry in S/G2/M thymocytes cultured for  
1043 2 hours *ex vivo* in the presence of different IAA concentrations. Thymocytes were isolated  
1044 from animals homozygous for either (B) *Ncaph*<sup>AID:Clover</sup> or (C) *Ncaph2*<sup>AID:Clover</sup> alleles in  
1045 combination with either one (dark purple) or two (light purple) alleles of *Rosa26*<sup>Tir1</sup>.  
1046 Equivalent data from animals heterozygous for AID-tagged alleles is shown in Figure S3. **D.**  
1047 Comparison of depletion kinetics in the presence of one (black) versus two (red) alleles of  
1048 the Tir1 transgene at low (solid line) versus high (dashed line) ligand concentrations (n = 3  
1049 biological replicate samples). Each experiment in panels B – D used data from at least 1000  
1050 S/G2/M thymocytes, gated on DNA content. In panel D, the mean background-corrected  
1051 fluorescence value for each cell population is expressed as a percentage of the mean  
1052 background-corrected fluorescence value for the vehicle only condition.

1053

### 1054 **Figure S2: Supplement to Figure 3**

1055 Histograms show the distribution of Clover expression levels, measured by flow cytometry in  
1056 >1000 S/G2/M thymocytes cultured for 2 hours *ex vivo* in the presence of different IAA  
1057 concentrations. Thymocytes were isolated from animals heterozygous for either (A)  
1058 *Ncaph*<sup>AID:Clover</sup> or (B) *Ncaph2*<sup>AID:Clover</sup> alleles in combination with either one (dark purple) or  
1059 two (light purple) alleles of *Rosa26*<sup>Tir1</sup>.

1060

### 1061 **Figure 4: Dosage of AID-tagged proteins controls their degradation kinetics**

1062 **A.** The relative expression of *Ncaph* and *Ncaph2* (n = 6 biological replicates each) in S/G2/M  
1063 thymocytes, based on flow cytometric Clover fluorescence measurements in > 1000 cells. **B.**  
1064 Table showing the relative total dose of AID tagged proteins in mice heterozygous for  
1065 *Ncaph2*<sup>AID:Clover</sup> in combination with either 0 (Low), 1 (Medium) or 2 (High) alleles of  
1066 *Ncaph*<sup>AID:Clover</sup>. Relative AID dose is calculated based on data in panel A. **C.** Schematic  
1067 showing the time course for auxin treatment of primary thymocytes in panels D&E. **D.**  
1068 Western blots probed with a polyclonal antibody against *Ncaph2*. Tagged protein (upper  
1069 band) is degraded, whereas wildtype protein (lower band) is not. \* indicates non-specific  
1070 band. **E.** Quantification of *Ncaph2*-AID:Clover depletion in the presence of low, medium or  
1071 high overall AID-tagged protein dose. Density of the AID:Clover band (see panel D) was first  
1072 measured relative to the corresponding wildtype allele (bottom) as an internal control. The  
1073 AID:WT ratio in the vehicle only control was set at 100% and IAA treatment conditions were  
1074 then calculated relative to this value. Data from two independent experiments are presented.

1075

### 1076 **Figure 5: Dynamic changes in condensin dependency during lymphocyte** 1077 **differentiation**

1078 **A.** Chronological representation of the BrdU pulse chase assay to measure the efficiency of  
1079 cell division in primary cell types cultured *ex vivo*. Lymphocyte isolation and culture protocols  
1080 are detailed in the materials and methods. Quantifying the % of BrdU<sup>+</sup> cells (B) that  
1081 complete mitosis and halve their DNA content (C) allows the efficiency of a single cell  
1082 division to be quantified under normal or acute condensin deficient conditions. The  
1083 appearance of BrdU<sup>+</sup>G1 cells can be seen at 3 and 5 hours. **D.** Representative DNA content



1084 profiles, gated on BrdU<sup>+</sup> as shown in panel B, from cycling early (thymic / marrow) or  
1085 activated mature (Splenic) T and B lymphocytes, measured following a 3.5 hour chase in the  
1086 presence or absence of condensin I or II. **E.** Quantification of division efficiency, based on  
1087 the % of BrdU<sup>+</sup> cells in G1 after 3.5 hours (n = 3 biological replicates from at least 2  
1088 independent experiments). Corresponding condensin depletion levels for each experiment  
1089 are shown in Figure S3C **F.** Quantification of the effect of Ncaph or Ncaph2 degradation on  
1090 cell division across cell types in panel E. For each cell type, division efficiency (panel E) in  
1091 the vehicle only control condition was set to 100%, and the same parameter in IAA treated  
1092 cells was expressed relative to this. Asterisks represent p-values from paired t-tests \*\*\* = p <  
1093 0.01, \*\* = p < 0.05, \* = p < 0.1

1094

### 1095 **Figure S3: Supplement to Figure 5.**

1096 **A.** The % of cells engaged in DNA replication (BrdU<sup>+</sup>) is not significantly different following  
1097 acute depletion of Ncaph or Ncaph2. Each point shows the average % of cells incorporating  
1098 BrdU following a 30 minute pulse following 2 hours of culture in 500 $\mu$ M IAA or vehicle,  
1099 measured by flow cytometry. Bone marrow B cells required an extra hour of IAA treatment  
1100 (3h total) to achieve robust depletion. Experimental schematic is shown in Figure 5A **B.**  
1101 Acute depletion of Ncaph or Ncaph2 does not induce the DNA damage marker  $\gamma$ H2AX in  
1102 interphase cells undergoing DNA replication. Each point represents the average  
1103 fluorescence intensity from at least 1000 single CD8<sup>+</sup> thymocytes single cells with DNA  
1104 content between 2N and 4N (presumed to be in S phase). \* indicates significant differences  
1105 at p < 0.05 based on 2-tailed unpaired t-tests. Positive control wildtype cells were treated  
1106 with 500 $\mu$ M hydroxyurea for 3 hours to induce replication fork collapse. **C.** Mean depletion  
1107 levels of Ncaph and Ncaph2 proteins in the BrdU pulse chase experiments shown in Figure  
1108 5. Clover was quantified by flow cytometry in S/G2/M cells at the start (0hrs) and end  
1109 (3.5hrs) of the chase period, with the +IAA value expressed as a % of vehicle only control  
1110 after correcting for background autofluorescence. Where mean Clover fluorescence was  
1111 lower than autofluorescence in the +IAA condition, a mean value of 0% was assigned. **D.**  
1112 Reduced proliferation in peripheral B cells following acute degradation of Ncaph or Ncaph2,  
1113 measured by Cell Trace flow cytometry assays. Contour plots show Cell Trace dye dilution  
1114 via cell division following stimulation with LPS + IL4 for 48 hours in the continuous presence  
1115 of 500 $\mu$ M IAA. Condensin-AID:Clover signal is shown on the y-axis to visualise degradation.

1116

### 1117 **Figure 6: Rapid degradation of endogenous tagged proteins in living mice**

1118 **A.** (Top) I.P. injection time course to test protein degradation *in vivo*. Each mouse received a  
1119 single injection of IAA solution (100mg/kg), or vehicle. (bottom). Boxplots show the extent of  
1120 targeted protein degradation in >1000 S/G2/M CD8<sup>+</sup> thymocytes harvested 1 or 2 hours  
1121 following auxin injection, measured by flow cytometry. % protein remaining was calculated  
1122 as described in the Figure 2 legend. Boxes indicate the boundaries of upper and lower  
1123 quartiles and whiskers show the range. Data are from 3 biological replicate injections  
1124 performed over at least two independent experiments. **B.** Proteome quantification by mass  
1125 spectrometry analysis of MACS-purified CD8<sup>+</sup> thymocytes. n = 3 animals per condition. **C.**  
1126 Protein degradation and recovery following a single I.P. injection. Data are presented as  
1127 described for panel A, except mice were heterozygous for the *Ncaph2*<sup>AID:Clover</sup> allele. **D.**  
1128 Schematic illustration of experimental workflow for protein degradation in E10.5 embryos. **E.**  
1129 Example image from whole mount immunofluorescence performed on E10.5 embryo  
1130 cryosections, stained with DAPI, anti-GFP-647 nanobooster (detecting Ncaph-AID:Clover)  
1131 and anti-Cdh1. Anti-GFP signal was quantified within 5 Cdh1<sup>+</sup> regions of interest (ROI) per  
1132 embryo, which were selected based solely on the Cdh1 staining pattern. To enable Cdh1  
1133 localisation and ROIs to be visualised, the anti-GFP-647 channel is not shown in this panel.  
1134 Images were captured at 40X magnification, scale bar = 800 $\mu$ m **F.** Example ROI's from  
1135 Cdh1<sup>+</sup> stained tissue on which target protein quantification was performed. To visualise  
1136 degradation, only the Ncaph-AID:Clover channel is shown. Scale bar = 10 $\mu$ m **G.**  
1137 Quantification of degradation efficiency in Cdh1<sup>+</sup> embryonic cells. Mean pixel intensity was

1138 first calculated from 5 Cdh1<sup>+</sup> regions in *Ncaph*<sup>AID:Clover/AID:Clover</sup> *Rosa26*<sup>Tir1/Tir1</sup> embryos from  
1139 mothers injected with either IAA or vehicle, and non-fluorescent negative control embryos (n  
1140 = 1 embryo each). The mean pixel intensity value from negative control ROIs was set to 0%,  
1141 and the mean value from vehicle-only ROIs to 100%. Mean pixel intensity values for each  
1142 ROI from vehicle and IAA-exposed embryos were then plotted on this scale. Negative values  
1143 were set to 0%.

1144

1145 **Figure S4: Supplement to Figure 6**

1146 **A.** Boxplots quantify the extent of targeted protein depletion in CD8<sup>+</sup> thymocytes from  
1147 *Ncaph*<sup>AID:Clover/+</sup> *Rosa26*<sup>Tir1</sup> animals injected with IAA at increasing dose. % protein remaining  
1148 was calculated as described in the legend for Figure 2. Boxes show the boundaries of upper  
1149 and lower quartiles and whiskers show the range. Where negative values were observed, a  
1150 value of 0% was assigned. N = 1 per condition. **B.** A panel of liver function tests performed  
1151 on plasma collected post-mortem from adult mice (n = 3 per condition) 2 hours or 72 hours  
1152 after I.P. injection with IAA (100mg/kg) or vehicle. No significant differences (p < 0.05) were  
1153 detected in unpaired two-tailed t-tests. ALP; Alkaline Phosphatase, AST; Aspartate  
1154 Transaminase, ALT; Alanine transaminase. **C.** I.P. injection time course to test protein  
1155 degradation in CD19<sup>+</sup> bone marrow cells *in vivo*. Data were captured, analysed and  
1156 presented as described in Figure 6A.

1157

1158 **Figure S5: Supplement to Figure 6**

1159 **A.** Immunofluorescence on cryosections from small intestine of an *Ncaph*<sup>AID/AID</sup> *Rosa26*<sup>Tir1/Tir1</sup>  
1160 adult, fixed following 2 hour exposure to IAA *in vivo* (100mg/kg, I.P.). Scale bar 10µm.  
1161 *Ncaph* degradation was quantified specifically within DAPI-stained regions of mitotic  
1162 (ph3S10<sup>+</sup>) cells, but can also be observed in the vast majority of interphase cells. Arrows  
1163 show the position of an IAA-unresponsive cell. **B.** Different levels of *Ncaph* degradation  
1164 observed in CD8<sup>+</sup> thymocytes and Ter119<sup>+</sup> erythroblasts from a single animal 2 hours  
1165 following I.P. injection of IAA. **C.** Different levels of *Ncaph* degradation in CD19<sup>+</sup> B cell  
1166 precursors and Ter119<sup>+</sup> erythroblasts following IAA treatment from the same *ex vivo* short-  
1167 term bone marrow culture. In panels B & C, boxes show the boundaries of upper and lower  
1168 quartiles and whiskers show the range of degradation values for >1000 S/G2/M cells,  
1169 calculated as described in the legend for Figure 2. **D.** Immunofluorescence on cryosections  
1170 from fixed adult testes (*Ncaph*<sup>AID/AID</sup> *Rosa26*<sup>Tir1/Tir1</sup>) shows little if any target protein  
1171 degradation. Yellow boxes in the upper panel show zoomed regions in the lower panel.  
1172 Upper scale bar = 15µm, Lower scale bar = 10µm.

1173

1174

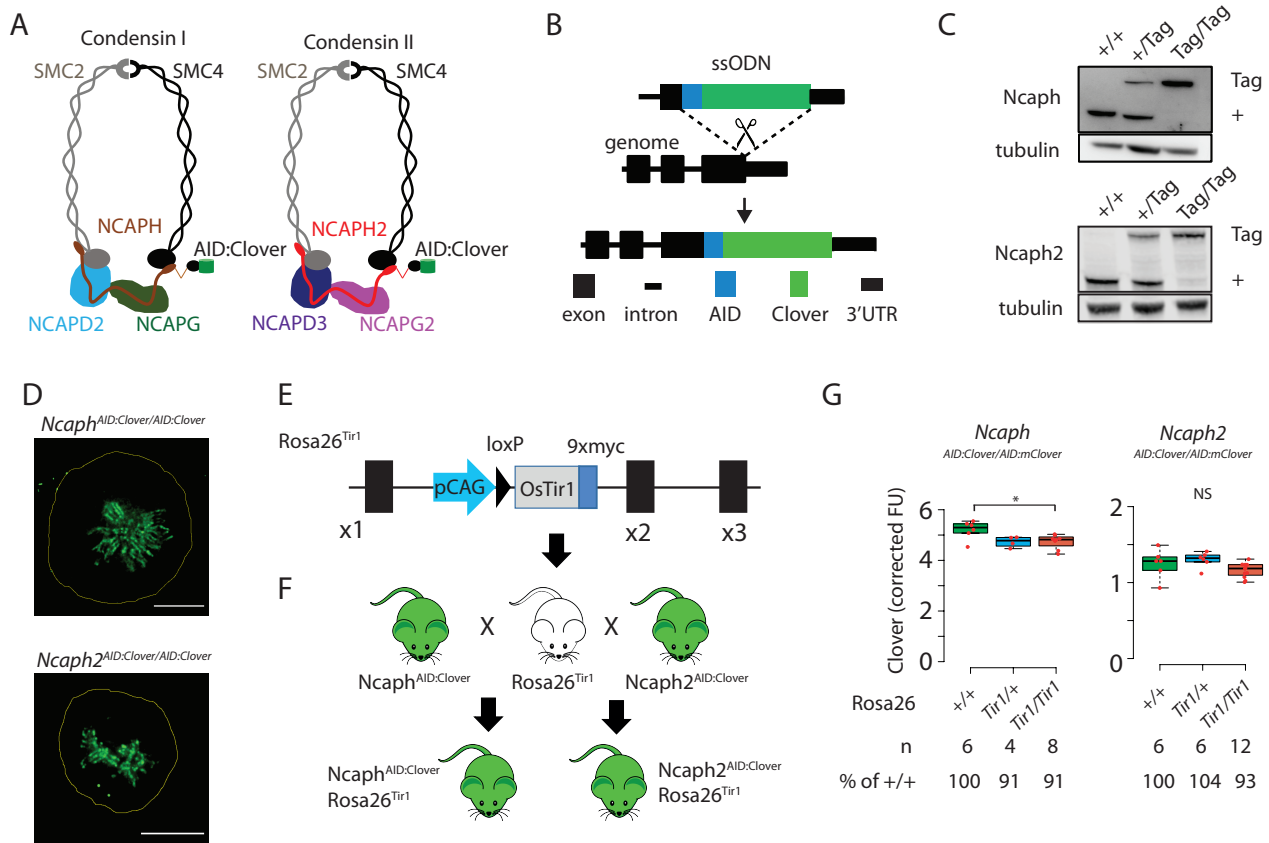

### Figure 1: Mouse models for auxin-inducible degradation of condensin proteins

**A.** Schematic diagrams showing the subunit composition of condensin I and II complexes with C-terminal AID:Clover. The kleisin subunits of condensin I and II are Ncaph and Ncaph2, respectively. **B.** CRISPR-Cas9 strategy for integrating mClover cassettes at the Ncaph and Ncaph2 loci using long single stranded deoxyoligonucleotides (ssODN) to generate *Ncaph*<sup>AID:Clover</sup> and *Ncaph2*<sup>AID:Clover</sup> alleles. Full details and sequences for the integrated cassettes are given in Appendix S1. **C.** Western blots prepared from thymic whole cell protein extract were probed with antibodies recognising endogenous Ncaph or Ncaph2, with tubulin as a loading control. '+' indicates wildtype allele, 'tag' indicates AID:Clover. **D.** Immunofluorescence imaging of mitotic murine embryonic fibroblast lines derived from *Ncaph*<sup>AID:Clover/AID:Clover</sup> and *Ncaph2*<sup>AID:Clover/AID:Clover</sup> embryos. Scale bar = 5  $\mu$ m. **E.** Schematic diagram showing the Rosa26<sup>Tir1</sup> allele. Details on how this allele was generated are in Figure S1D and the materials and methods. **F.** Breeding scheme to combine endogenously-tagged *Ncaph* and *Ncaph2* alleles with Rosa26<sup>Tir1</sup>. **G.** Clover fluorescence was measured by flow cytometry in primary S/G2/M thymocytes (gated on DNA content, n > 1000 cells/sample) from mice homozygous for AID:Clover-tagged target proteins, in combination with 0, 1 or 2 alleles of the Rosa26<sup>Tir1</sup> transgene. Cells were not subjected to IAA treatment. Boxplots show background-corrected mean fluorescence values from (n) biological replicate samples. \* indicates a significant (p<0.05) difference between genotypes (one-way ANOVA with Tukey HSD test, p < 0.05). NS: not significant.

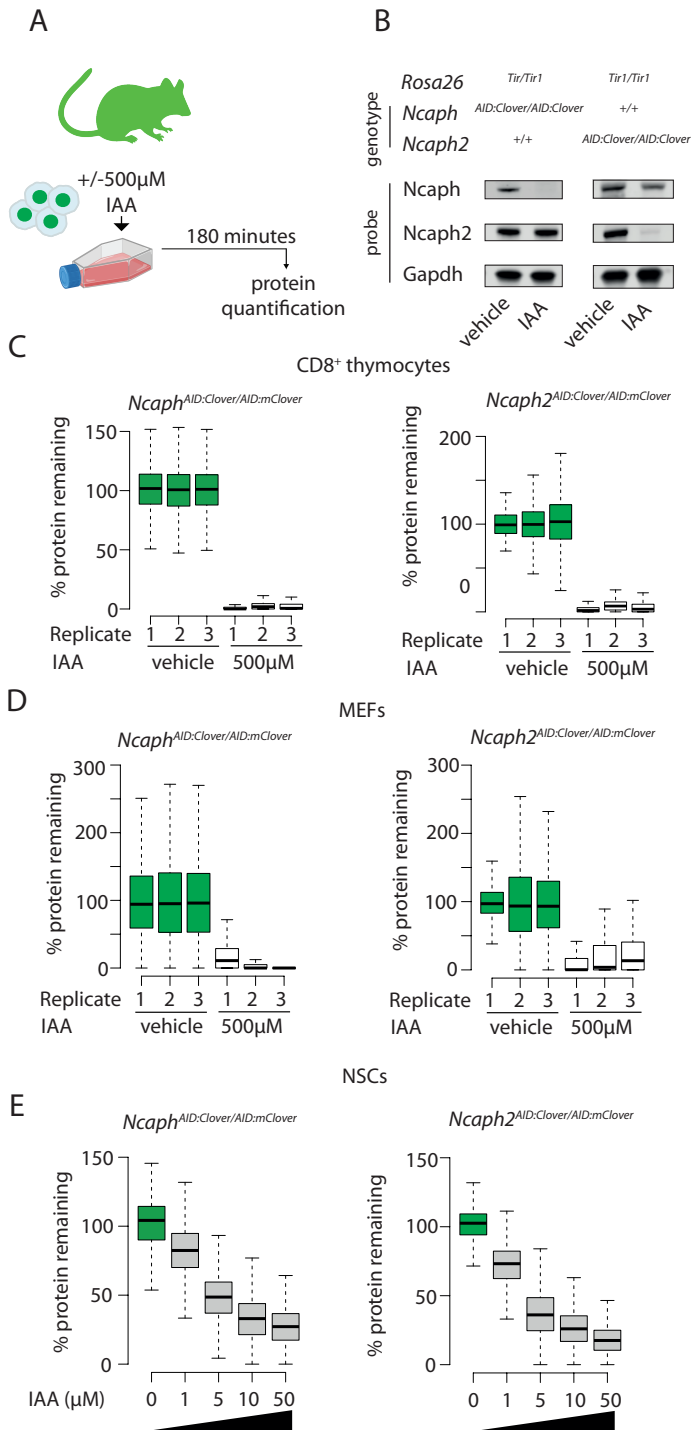

## Figure 2: Rapid and titratable degradation of endogenous *Ncaph* and *Ncaph2* in primary cells

**A.** Schematic illustration of experiments designed to test targeted degradation of condensin subunits in primary cells. **B.** Western blots prepared from thymus whole cell extract and probed with polyclonal antibodies against *Ncaph*, *Ncaph2*, or a Gapdh loading control. Robust tag-dependent degradation of target proteins is clearly evident after 3 hours of auxin treatment. **C & D.** Boxplots quantify the extent of targeted protein depletion following IAA treatment (500 $\mu$ M for 3 hours), measured by flow cytometry in primary CD8<sup>+</sup> thymocytes (C) and embryonic fibroblasts (D).  $n = 3$  biological replicates from at least 2 independent experiments, with degradation measured in over 1000 S/G2/M cells in each case. To calculate % protein remaining, the background corrected fluorescence value of each cell was expressed as a percentage of the mean fluorescence value for all cells in the vehicle-only condition. Boxes show the boundaries of upper and lower quartiles and whiskers show the range. Where negative values were observed (e.g. in MEFs due to variable autofluorescence between lines), a value of 0% was assigned. **E.** Titration of target protein levels in primary neural stem cells treated with different IAA concentrations for 2 hours. Boxplots were generated as described for panels C&D.

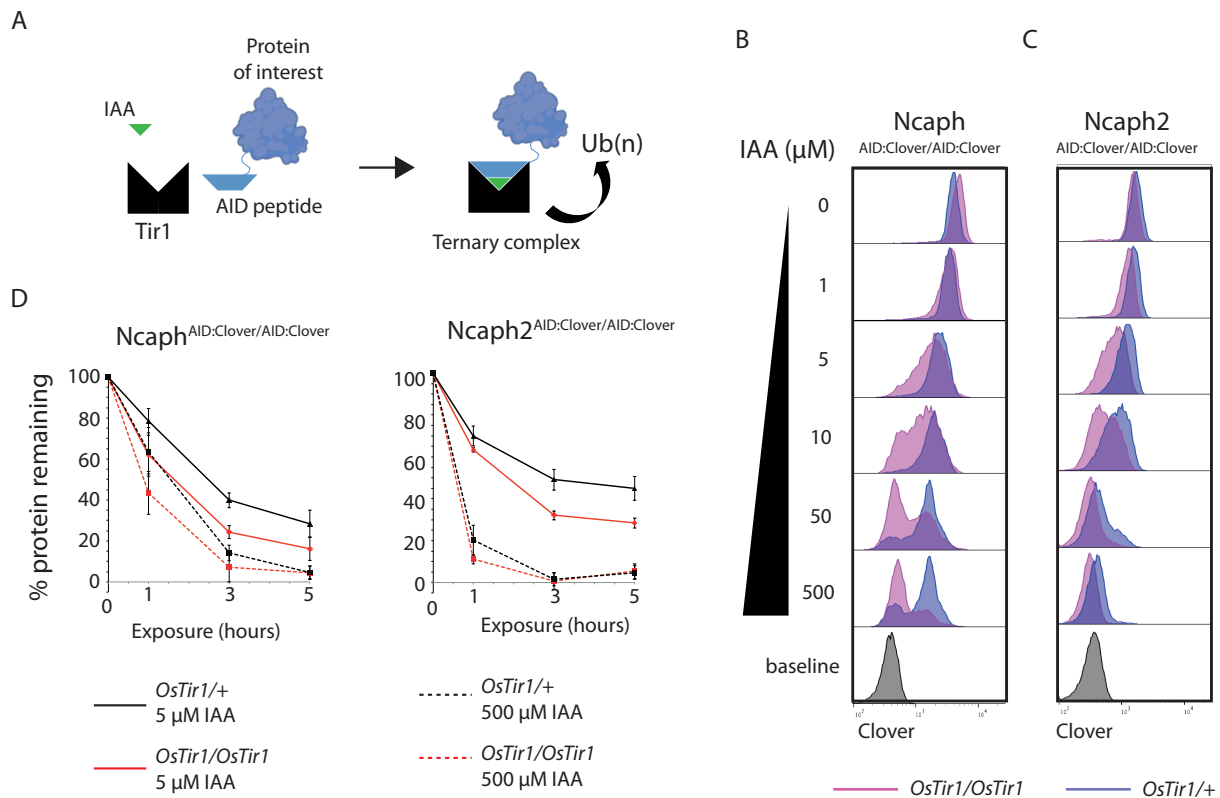

**Figure 3: Tir1 dosage determines degradation kinetics of AID-tagged proteins.**

**A.** Schematic diagram illustrates the assembly of the Tir1 substrate receptor protein, IAA ligand and AID tagged target protein-of-interest into a ternary complex necessary for target protein ubiquitination via  $\text{SCF}^{\text{Tir1}}$ , and degradation. **B & C.** Histograms show the distribution of Clover expression levels, measured by flow cytometry in S/G2/M thymocytes cultured for 2 hours *ex vivo* in the presence of different IAA concentrations. Thymocytes were isolated from animals homozygous for either (B) *Ncaph*<sup>AID:Clover</sup> or (C) *Ncaph2*<sup>AID:Clover</sup> alleles in combination with either one (dark purple) or two (light purple) alleles of *Rosa26*<sup>Tir1</sup>. Equivalent data from animals heterozygous for AID-tagged alleles is shown in Figure S3. **D.** Comparison of depletion kinetics in the presence of one (black) versus two (red) alleles of the Tir1 transgene at low (solid line) versus high (dashed line) ligand concentrations (n = 3 biological replicate samples). Each experiment in panels B – D used data from at least 1000 S/G2/M thymocytes, gated on DNA content. In panel D, the mean background-corrected fluorescence value for each cell population is expressed as a percentage of the mean background-corrected fluorescence value for the vehicle only condition.

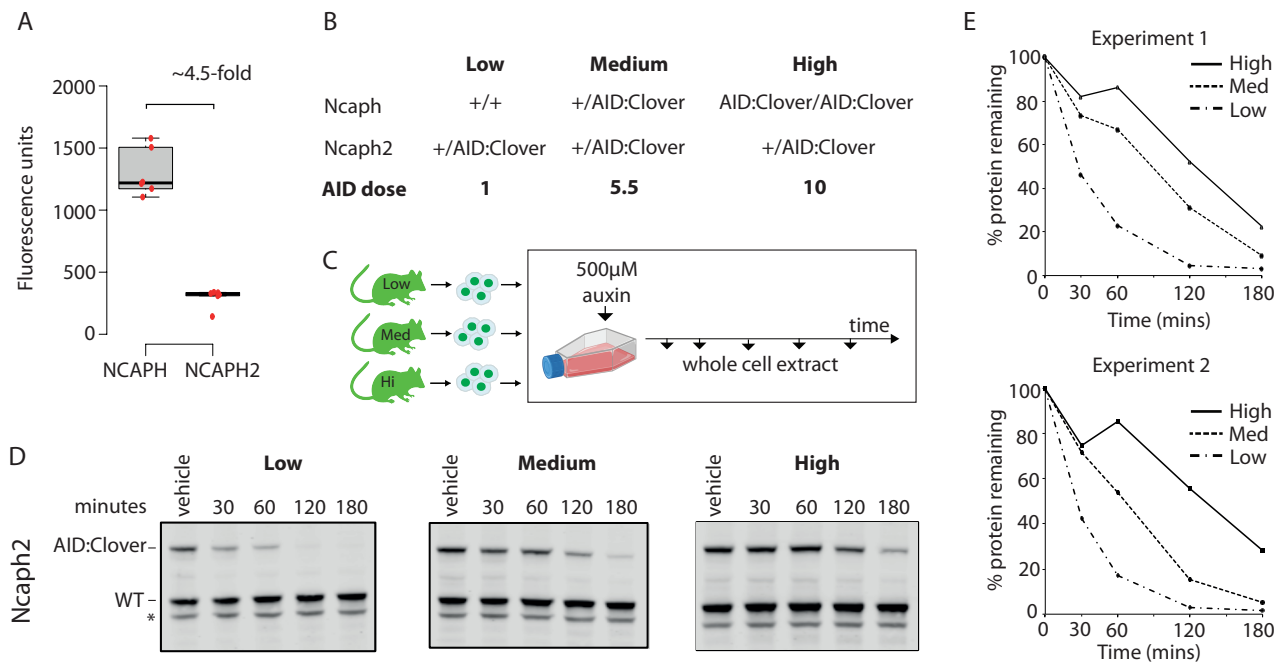

#### Figure 4: Dosage of AID-tagged proteins controls depletion kinetics

**A.** The relative expression of Ncaph and Ncaph2 ( $n = 6$  biological replicates each) in S/G2/M thymocytes, based on flow cytometric Clover fluorescence measurements in  $> 1000$  cells. **B.** Table showing the relative total dose of AID tagged proteins in mice heterozygous for *Ncaph2*<sup>AID:Clover</sup> in combination with either 0 (Low), 1 (Medium) or 2 (High) alleles of *Ncaph*<sup>AID:Clover</sup>. Relative AID dose is calculated based on data in panel A. **C.** Schematic showing the time course for auxin treatment of primary thymocytes in panels D&E. **D.** Western blots probed with a polyclonal antibody against Ncaph2. Tagged protein (upper band) is degraded, whereas wildtype protein (lower band) is not. \* indicates non-specific band. **E.** Quantification of Ncaph2-AID:Clover depletion in the presence of low, medium or high overall AID-tagged protein dose. Density of the AID:Clover band (see panel D) was first measured relative to the corresponding wildtype allele (bottom) as an internal control. The AID:WT ratio in the vehicle only control was set at 100% and IAA treatment conditions were then calculated relative to this value. Data from two independent experiments are presented.

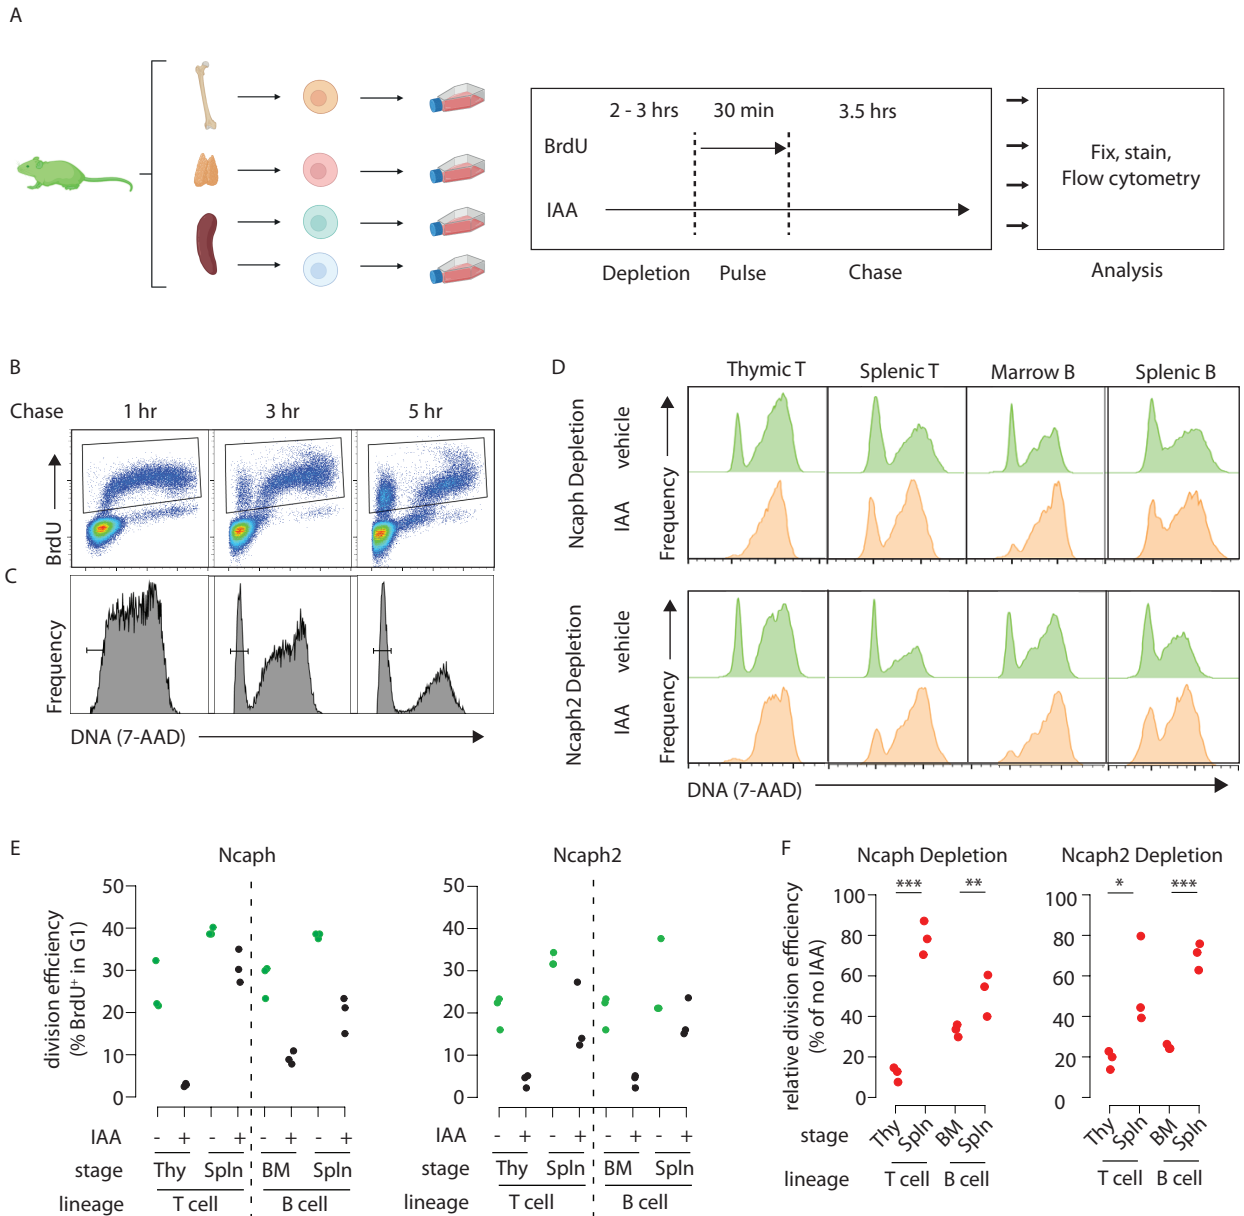

### Figure 5: Dynamic changes in condensin dependency during lymphocyte differentiation

**A.** Chronological representation of the BrdU pulse chase assay to measure the efficiency of cell division in primary cell types cultured *ex vivo*. Lymphocyte isolation and culture protocols are detailed in the materials and methods. Quantifying the % of BrdU<sup>+</sup> cells (**B**) that complete mitosis and halve their DNA content (**C**) allows the efficiency of a single cell division to be quantified under normal or acute condensin deficient conditions. The appearance of BrdU<sup>+</sup>G1 cells can be seen at 3 and 5 hours. **D.** Representative DNA content profiles, gated on BrdU<sup>+</sup> as shown in panel B, from cycling early (thymic / marrow) or activated mature (Splenic) T and B lymphocytes, measured following a 3.5 hour chase in the presence or absence of condensin I or II. **E.** Quantification of division efficiency, based on the % of BrdU<sup>+</sup> cells in G1 after 3.5 hours ( $n = 3$  biological replicates from at least 2 independent experiments). Corresponding condensin depletion levels for each experiment are shown in Figure S3C **F.** Quantification of the effect of Ncaph or Ncaph2 degradation on cell division across cell types in panel E. For each cell type, division efficiency (panel E) in the vehicle only control condition was set to 100%, and the same parameter in IAA treated cells was expressed relative to this. Asterisks represent p-values from paired t-tests \*\*\* =  $p < 0.01$ , \*\* =  $p < 0.05$ , \* =  $p < 0.1$

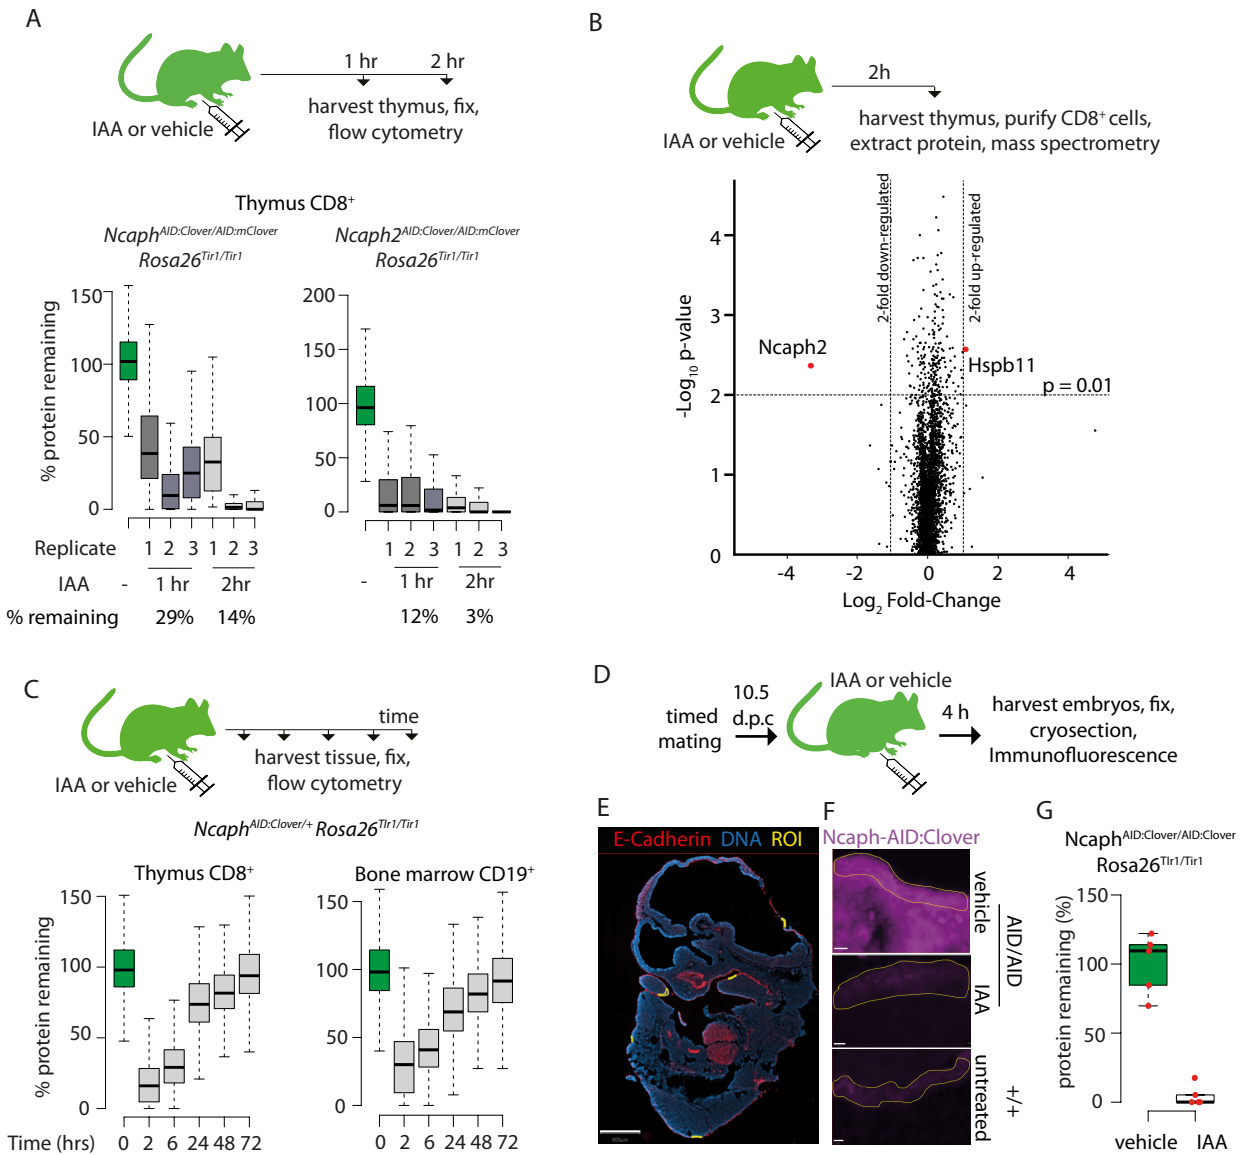

**Figure 6: Rapid degradation of endogenous tagged proteins in living mice**  
Legend on next page



### Figure 6: Rapid degradation of endogenous tagged proteins in living mice

**A.** (Top) Schematic illustration of an I.P. injection time course to test protein degradation *in vivo*. Each mouse received a single injection of IAA solution (100mg/kg), or vehicle. (bottom) Boxplots show the extent of targeted protein degradation in >1000 S/G2/M CD8<sup>+</sup> thymocytes harvested 1 or 2 hours following auxin injection, measured by flow cytometry. % protein remaining was calculated as described in the Figure 2 legend. Boxes indicate the boundaries of upper and lower quartiles and whiskers show the range. Data are from 3 biological replicate injections performed over at least two independent experiments. **B.** Proteome quantification by mass spectrometry analysis of MACS-purified CD8<sup>+</sup> thymocytes. n = 3 animals per condition. **C.** Protein degradation and recovery following a single I.P. injection. Data are presented as described for panel A, except mice were heterozygous for the *Ncaph2*<sup>AID:Clover</sup> allele. **D.** Schematic illustration of experimental workflow for protein degradation in E10.5 embryos. **E.** Example image from whole mount immunofluorescence performed on E10.5 embryo cryosections, stained with DAPI, anti-GFP-647 nanobooster (detecting Ncaph-AID:Clover) and anti-Cdh1. Anti-GFP signal was quantified within 5 Cdh1<sup>+</sup> regions of interest (ROI) per embryo, which were selected based solely on the Cdh1 staining pattern. To enable Cdh1 localisation and ROIs to be visualised, the anti-GFP-647 channel is not shown in this panel. Images were captured at 40X magnification, scale bar = 800µm **F.** Example ROI's from Cdh1<sup>+</sup> stained tissue on which target protein quantification was performed. To visualise degradation, only the Ncaph-AID:Clover channel is shown. Scale bar = 10µm **G.** Quantification of degradation efficiency in Cdh1<sup>+</sup> embryonic cells. Mean pixel intensity was first calculated from 5 Cdh1<sup>+</sup> regions in *Ncaph*<sup>AID:Clover/AID:Clover</sup> *Rosa26*<sup>Tir1/Tir1</sup> embryos from mothers injected with either IAA or vehicle, and non-fluorescent negative control embryos (n = 1 embryo each). The mean pixel intensity value from negative control ROIs was set to 0%, and the mean value from vehicle-only ROIs to 100%. Mean pixel intensity values for each ROI from vehicle and IAA-exposed embryos were then plotted on this scale. Negative values were set to 0%.

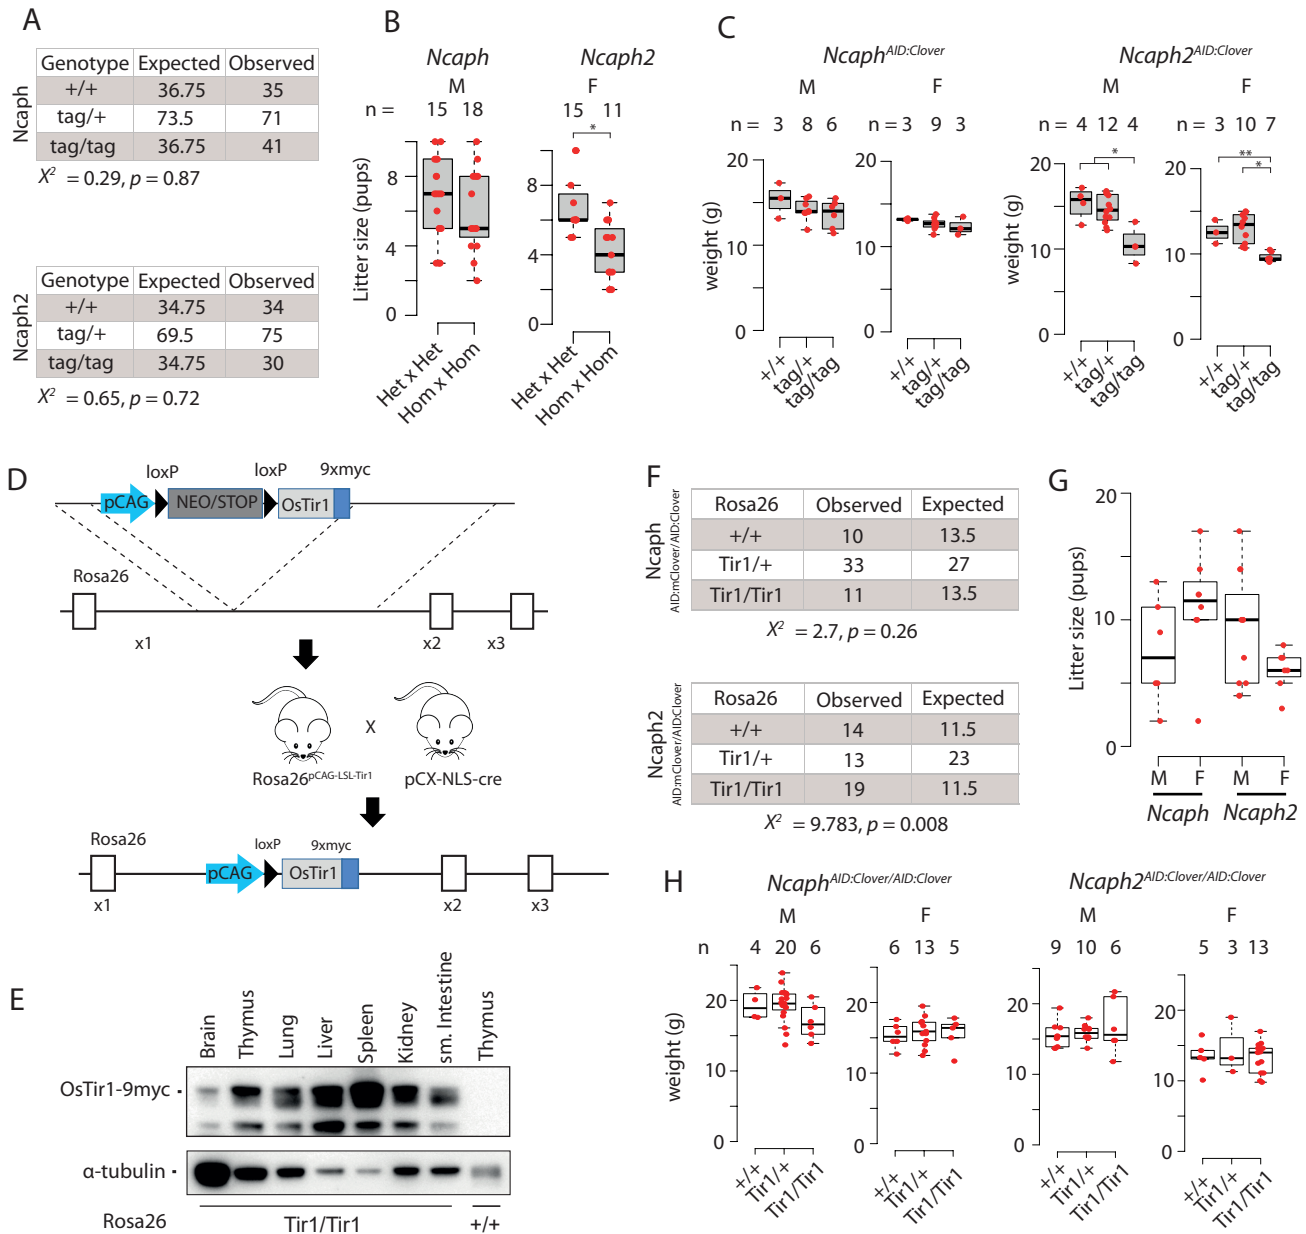

**Figure S1: Supplement to Figure 1**

**A.** Observed and expected genotype frequencies among 28 day-old animals generated from heterozygous crosses for each AID:Clover transgene (tag). Chi-squared tests revealed no significant deviation from expected mendelian frequencies. **B.** Litter sizes from matings between animals heterozygous versus homozygous for each AID:Clover transgene. \* indicates significant difference at  $p < 1 \times 10^{-3}$  from unpaired two-tailed t-tests **C.** Weight of pups at 28 days post-partum from crosses between parents heterozygous for the AID:Clover transgene (tag/+). M = male, F = female. \* indicates significant differences between genotypes at  $p < 0.01$ , \*\* at  $p < 0.05$  from one-way ANOVA with Tukey's HSD posthoc test. **D.** Schematic illustrating the derivation of *Rosa26*<sup>Tir1</sup> via a *Rosa26*<sup>pCAG-LSL-Tir1</sup> intermediate. Breeding of *Rosa26*<sup>pCAG-LSL</sup> mice to pCX-NLS-cre caused germline deletion of the lox-stop-lox cassette to produce *Rosa26*<sup>Tir1</sup>. **E.** Western blots of whole tissue extracts from *Rosa26*<sup>Tir1/Tir1</sup> or *Rosa26*<sup>+/+</sup> animals, probed with an anti-myc tag antibody (9B11). **F.** Observed and expected genotype frequencies among 28 day-old animals generated from crosses between parents homozygous for either *Ncaph*- or *Ncaph2*<sup>AID:Clover</sup> and heterozygous for *Rosa26*<sup>OsTir1</sup>. Chi-squared tests revealed no significant deviation from expected mendelian frequencies of *Rosa26* genotypes in the *Ncaph* background, and elevated frequencies of *Rosa26*<sup>Tir1</sup> homozygotes in the *Ncaph2* background. **G.** Litter sizes from any mating involving a male (M) or female (F) carrying *Rosa26*<sup>Tir1</sup> and either *Ncaph*- or *Ncaph2*<sup>AID:Clover</sup> alleles in the homozygous state, in combination with animals of various genotype. Because genotypes of the other animal in each mating differed between conditions, these data show simply that breeding from double homozygous transgenic mice is possible and are not suitable to quantify fertility across conditions. **H.** Weight of pups at 28 days post-partum. Differences between Tir1 genotypes were not significant at  $p < 0.05$  in one-way ANOVA tests. M = male, F = female.

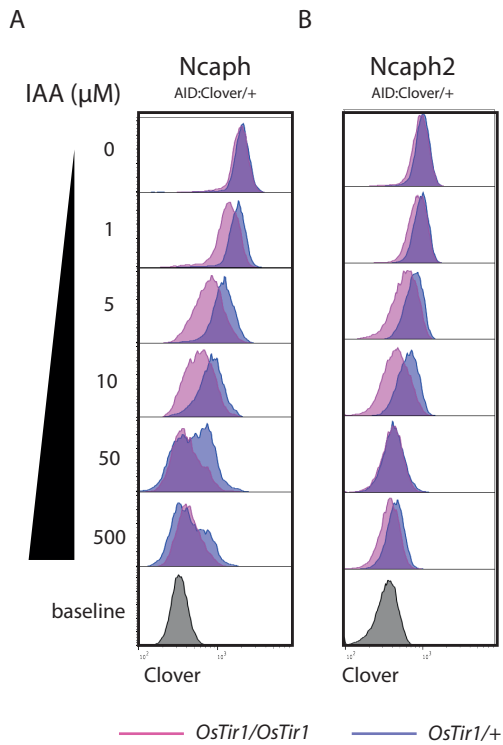

**Figure S2: Supplement to Figure 3**

**A.** Histograms show the distribution of Clover expression levels in >1000 S/G2/M thymocytes, cultured for 2 hours ex vivo in the presence of different IAA concentrations. Thymocytes were isolated from animals heterozygous for either **(A)** *Ncaph*<sup>AID:Clover</sup> or **(B)** *Ncaph2*<sup>AID:Clover</sup> alleles in combination with either one (dark purple) or two (light purple) alleles of *Rosa26*<sup>Tir1</sup>.

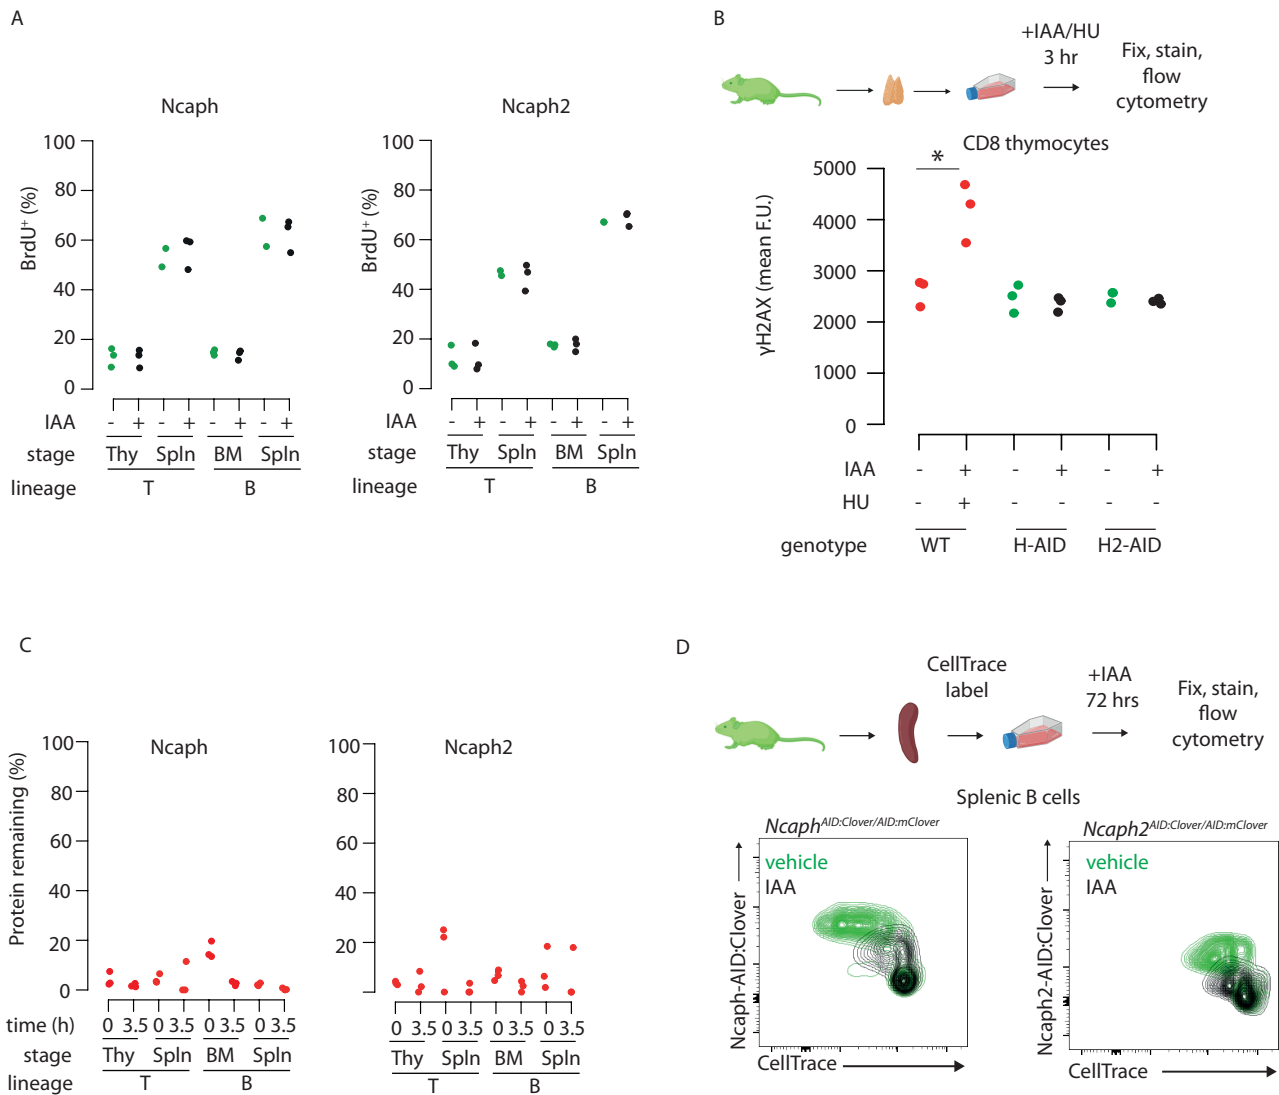

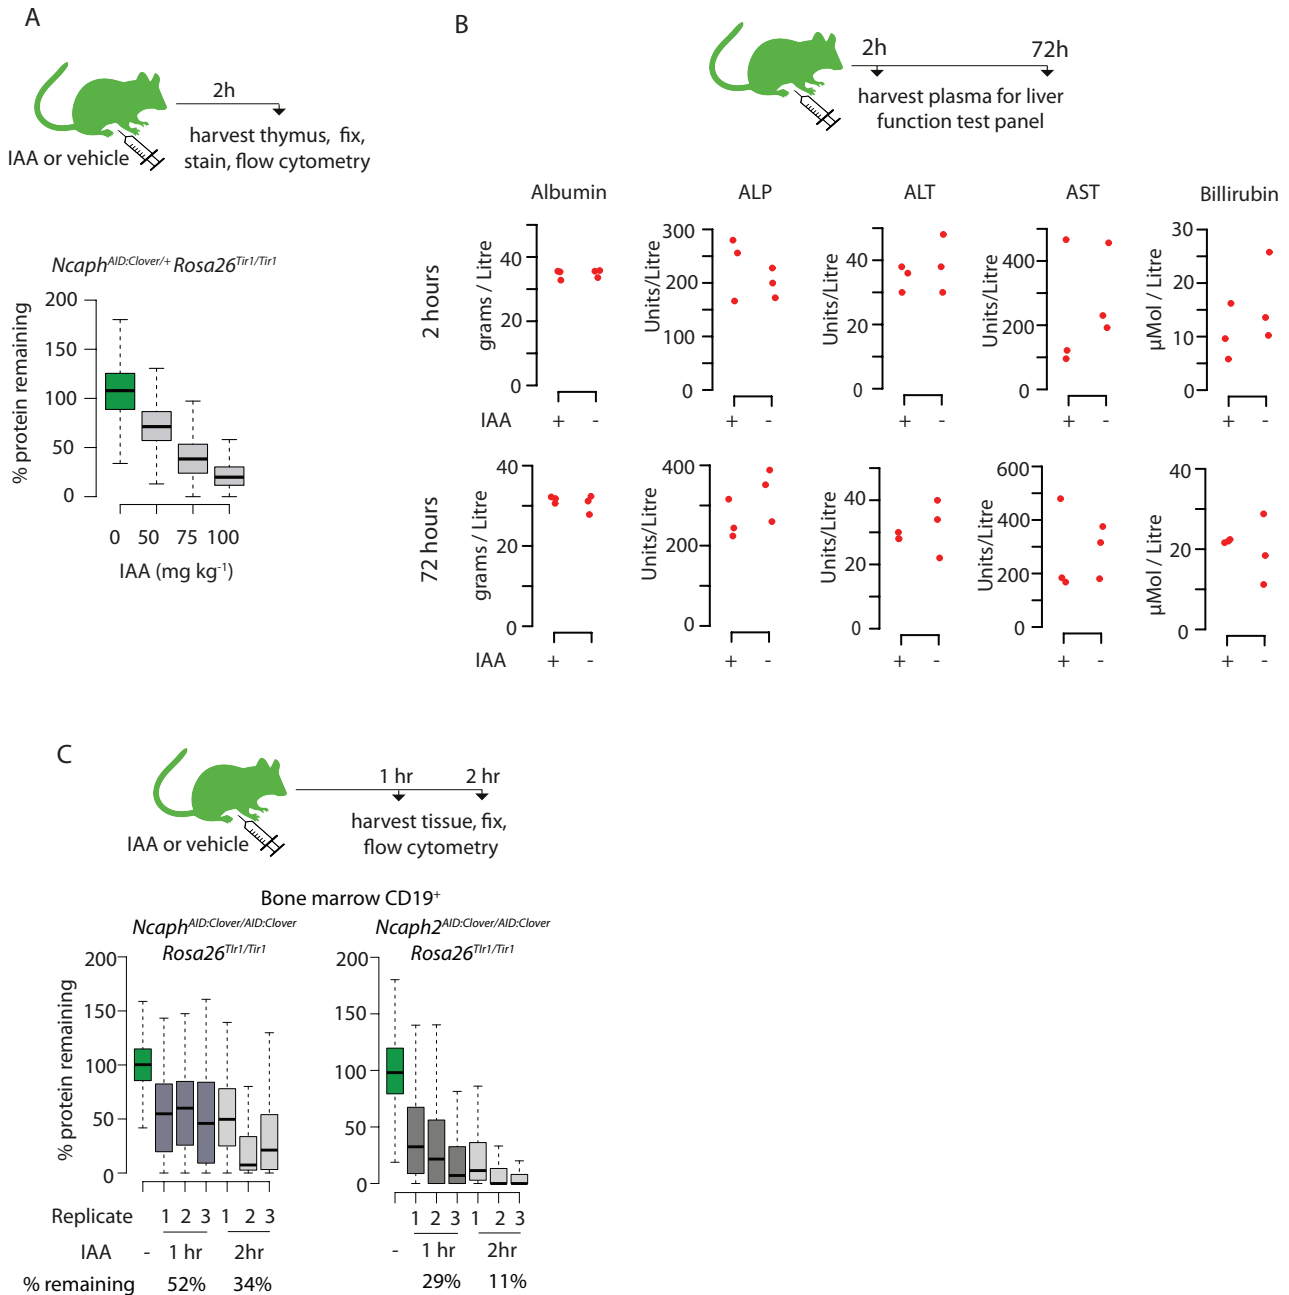

### Figure S4: Supplement to Figure 6

**A.** Boxplots quantify the extent of targeted protein depletion in CD8<sup>+</sup> thymocytes from *Ncaph<sup>AID:Clover/+</sup> Rosa26<sup>Tir1</sup>* animals injected with IAA at increasing dose. % protein remaining was calculated as described in the legend for Figure 2. Boxes show the boundaries of upper and lower quartiles and whiskers show the range. Where negative values were observed, a value of 0% was assigned. N = 1 per condition. **B.** A panel of liver function tests performed on plasma collected post-mortem from adult mice (n = 3 per condition) 2 hours or 72 hours after I.P. injection with IAA (100mg/kg) or vehicle. No significant differences (p < 0.05) were detected in unpaired two-tailed t-tests. ALP; Alkaline Phosphatase, AST; Aspartate Transaminase, ALT; Alanine transaminase. **C.** I.P. injection time course to test protein degradation in CD19<sup>+</sup> bone marrow cells *in vivo*. Data were captured, analysed and presented as described in Figure 6A.

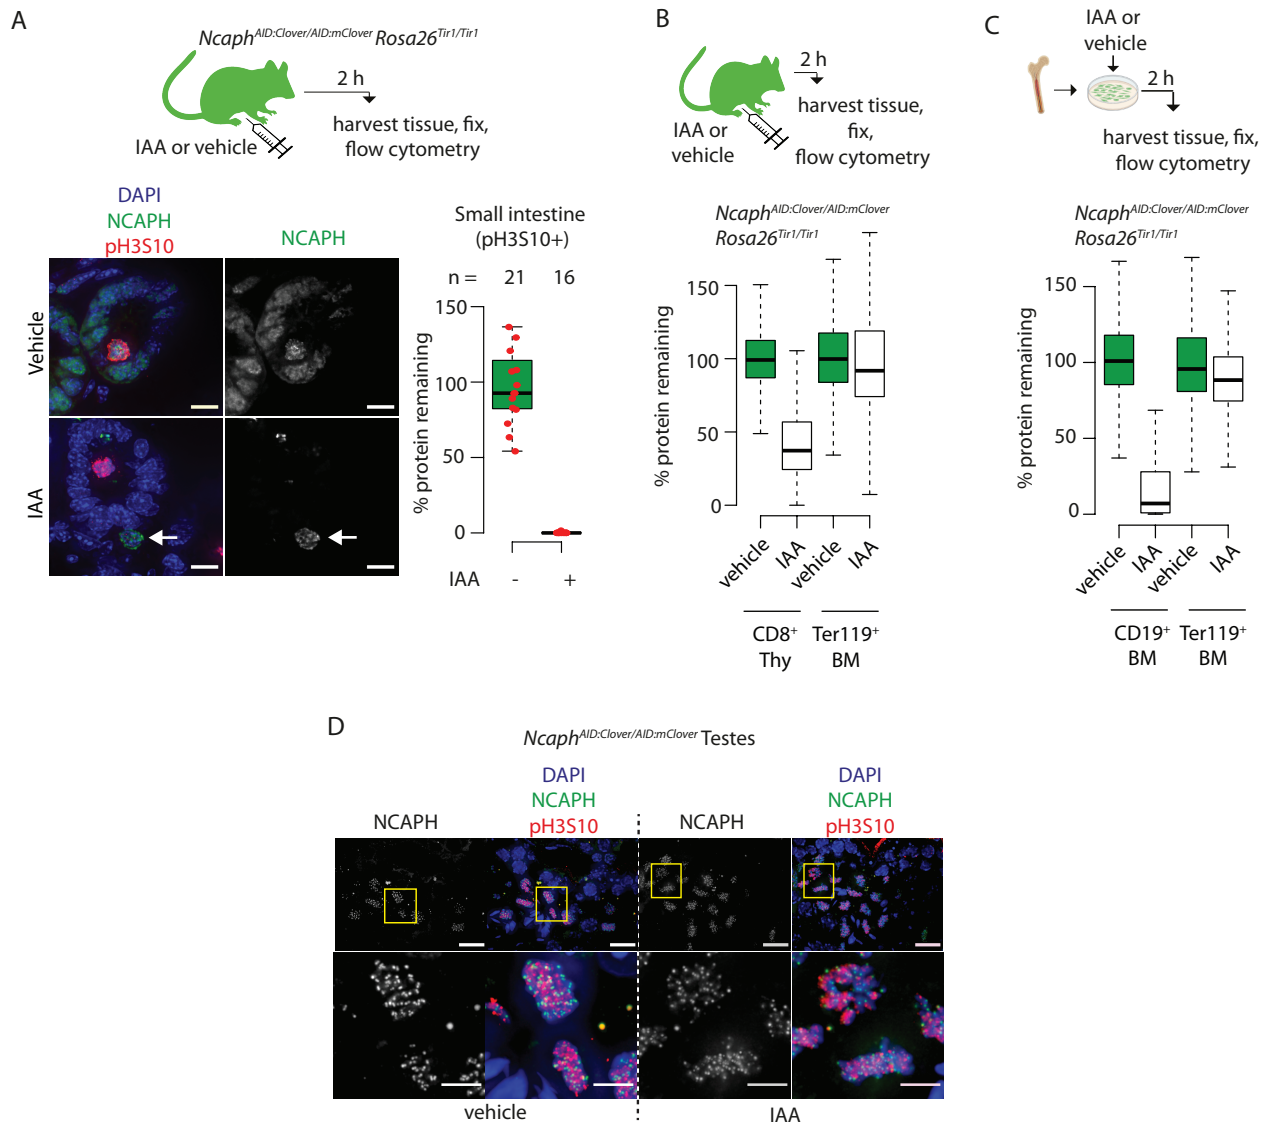

### Figure S5: Supplement to Figure 6

**A.** Immunofluorescence on cryosections from small intestine of an *Ncaph*<sup>AID/AID</sup> *Rosa26*<sup>Tir1/Tir1</sup> adult, fixed following 2 hour exposure to IAA *in vivo* (100mg/kg, I.P.). Scale bar 10μm. *Ncaph* degradation was quantified specifically within DAPI-stained regions of mitotic (pH3S10<sup>+</sup>) cells, but can also be observed in the vast majority of interphase cells. Arrows show the position of an IAA-unresponsive cell. **B.** Different levels of *Ncaph* degradation observed in CD8<sup>+</sup> thymocytes and Ter119<sup>+</sup> erythroblasts from a single animal 2 hours following I.P. injection of IAA. **C.** Different levels of *Ncaph* degradation in CD19<sup>+</sup> B cell precursors and Ter119<sup>+</sup> erythroblasts following IAA treatment from the same *ex vivo* short-term bone marrow culture. In panels B & C, boxes show the boundaries of upper and lower quartiles and whiskers show the range of degradation values for >1000 S/G2/M cells, calculated as described in the legend for Figure 2. **D.** Immunofluorescence on cryosections from fixed adult testes (*Ncaph*<sup>AID/AID</sup> *Rosa26*<sup>Tir1/Tir1</sup>) shows little if any target protein degradation. Yellow boxes in the upper panel show zoomed regions in the lower panel. Upper scale bar = 15μm, Lower scale bar = 10μm.
