# Supplementary material for: Rapid and specific degradation of endogenous proteins in mouse models using auxin-inducible degrons
Source: bioRxiv preprint, doi:10.1101/2022.01.13.476100, version 1 (2022-01-13)
Supplement: Table S1 [file 476100_file03.xlsx]

## Sheet: Sheet1
ProteinDescriptions	Genes	UniProtIds	Pvalue	AVG Log2 Ratio
Peroxisome proliferator-activated receptor delta	Ppard	A0A3B2W7W2;A0A3B2WD72;P35396	0.0279368	4.76969
OX-2 membrane glycoprotein;OX-2 membrane glycoprotein;OX-2 membrane glycoprotein;Cd200 protein;CD200 antigen	Cd200	E9PZI9;E9QMY1;O54901;Q05D16;Q80VX2	0.109545	1.57163
Schlafen 1	Slfn1	Q9Z0I7	0.812206	1.26126
LIM domain kinase 2	Limk2	O54785	0.15224	1.19345
VIP36-like protein (Fragment);VIP36-like protein;VIP36-like protein;VIP36-like protein	Lman2l	A0A0A6YX25;D3Z4P2;J3QNZ7;P59481	0.0135708	1.10047
Intraflagellar transport protein 25 homolog	Hspb11	Q9D6H2	0.00267064	1.07174
Serine/threonine-protein kinase 11-interacting protein	Stk11ip	Q3TAA7	0.172331	1.02661
MOB-like protein phocein;MOB-like protein phocein (Fragment);MOB-like protein phocein	Mob4	E0CXA9;E0CYJ0;Q6PEB6	0.00290524	0.992263
Bis(5'-adenosyl)-triphosphatase enpp4	Enpp4	Q8BTJ4	0.00605339	0.98121
E3 ubiquitin-protein ligase HECTD3	Hectd3	Q3U487	0.00485292	0.957338
Protein NipSnap homolog 3B	Nipsnap3b	Q9CQE1	0.0340269	0.943631
Transcription initiation factor IIA subunit 2	Gtf2a2	Q80ZM7	0.0341714	0.932128
Glutathione S-transferase A4	Gsta4	P24472	0.00980726	0.922807
Tyrosyl-DNA phosphodiesterase 2	Tdp2	Q9JJX7	0.0789296	0.906823
Xaa-Pro dipeptidase	Pepd	Q11136	0.0536526	0.9053
Endoplasmic reticulum metallopeptidase 1 (Fragment);Endoplasmic reticulum metallopeptidase 1	Ermp1	G8JL46;Q3UVK0	0.252671	0.90057
2-oxoisovalerate dehydrogenase subunit beta, mitochondrial	Bckdhb	Q6P3A8	0.00769001	0.881836
Ubiquitinyl hydrolase 1;Ubiquitinyl hydrolase 1 (Fragment);Ubiquitinyl hydrolase 1;Ataxin-3	Atxn3	E9Q717;F6T5L3;Q5M8S1;Q9CVD2	0.0127731	0.851188
ATPase family AAA domain-containing protein 2	Atad2	G3X963	0.023192	0.849153
Rac GTPase-activating protein 1	Racgap1	Q9WVM1	0.0714377	0.82865
Glyceraldehyde-3-phosphate dehydrogenase (Fragment)	Gapdh	S4R1W8	0.0505364	0.825839
Anaphase-promoting complex subunit 5;Anaphase-promoting complex subunit 5;Anaphase-promoting complex subunit 5;Anaphase-promoting complex subunit 5;Anaphase-promoting complex subunit 5 (Fragment);Anaphase-promoting complex subunit 5;Anaphase-promoting complex subunit 5	Anapc5	A0A0G2JDE8;A0A0G2JDM7;A0A0G2JE03;A0A0G2JFH0;A0A0G2JG78;Q3TWF7;Q8BTZ4	0.0425505	0.820588
Calcium-binding tyrosine phosphorylation-regulated protein	Cabyr	Q9D424	0.0456868	0.807858
N-acylneuraminate-9-phosphatase	Nanp	Q9CPT3	0.355285	0.794913
F-box only protein 22	Fbxo22	D6REV6;Q78JE5	0.0839577	0.79402
Tubulin alpha chain-like 3	Tubal3	Q3UX10	0.00890868	0.793691
Serine/threonine-protein kinase VRK2	Vrk2	Q8BN21	0.0245591	0.787236
Golgin subfamily A member 7	Golga7	Q91W53	0.208074	0.78595
Enolase-phosphatase E1	Enoph1	Q8BGB7	0.0111145	0.780545
Prostaglandin reductase 1	Ptgr1	Q91YR9	0.00454418	0.779875
Poliovirus receptor	Pvr	Q8K094	0.104381	0.777243
Acyl carrier protein (Fragment);Acyl carrier protein (Fragment);Acyl carrier protein, mitochondrial	Ndufab1	F6ZFT1;F8WJ64;Q9CR21	0.00325535	0.77434
Ribonuclease P/MRP protein subunit POP5	Pop5	Q9DB28	0.330307	0.767702
TBC1 domain family member 23	Tbc1d23	A0A2I3BRD1;Q8K0F1	0.235737	0.758103
Coronin (Fragment)	Coro1a	A0A0U1RPY8	0.0242215	0.753519
Activated leukocyte cell adhesion molecule;Activated leukocyte cell adhesion molecule;Activated leukocyte cell adhesion molecule (Fragment);CD166 antigen	Alcam	E9Q3Q6;E9Q4G8;F6QH25;Q61490	0.166176	0.739895
Keratin, type II cytoskeletal 79	Krt79	Q8VED5	0.109682	0.736934
Delta-aminolevulinic acid dehydratase	Alad	P10518	0.000589794	0.735298
Protein O-glucosyltransferase 1	Poglut1	Q8BYB9	0.00705145	0.727551
Glycerol kinase	Gk	B1ASZ3;Q64516	0.130112	0.723918
Nuclear nucleic acid-binding protein C1D (Fragment);Nuclear nucleic acid-binding protein C1D	C1d	A0A0A0MQK7;O35473	0.0405674	0.719664
Ras-related GTP-binding protein B;Ras-related GTP-binding protein A	Rragb;Rraga	Q6NTA4;Q80X95	0.0537899	0.719004
Fatty-acid amide hydrolase 1	Faah	O08914	0.0169002	0.718373
THUMP domain-containing protein 3	Thumpd3	P97770	0.0153643	0.718267
SWI/SNF-related matrix-associated actin-dependent regulator of chromatin subfamily A containing DEAD/H box 1	Smarcad1	Q04692	0.0865346	0.714499
Proteasome subunit beta type-5	Psmb5	O55234	0.0255519	0.713706
Component of oligomeric Golgi complex 2;Conserved oligomeric Golgi complex subunit 2	Cog2	H3BJK5;Q921L5	0.00252967	0.705675
DNA ligase 4	Lig4	Q8BTF7	0.0524322	0.699132
Predicted gene, 49804	Gm49804	A0A3B2W864	0.049426	0.692408
Aldehyde dehydrogenase, mitochondrial	Aldh2	A0A0G2JEU1	0.824801	0.685214
Beta-globin	Hbb-bs	A8DUK4	0.080232	0.679264
Serine/threonine-protein phosphatase 2A 56 kDa regulatory subunit alpha isoform	Ppp2r5a	Q6PD03	0.0329587	0.67667
Proteasome assembly chaperone 4	Psmg4	P0C7N9	0.0192893	0.676181
DnaJ homolog subfamily C member 15	Dnajc15	Q78YY6	0.469649	0.675625
Rab11 family-interacting protein 1	Rab11fip1	A0A1B0GRJ0;E9Q8L9;Q9D620	0.00503716	0.671795
Dipeptidyl peptidase 9	Dpp9	Q8BVG4	0.401688	0.671041
Lys-63-specific deubiquitinase BRCC36	Brcc3	P46737	0.0170142	0.661529
GTPase IMAP family member 9	Gimap9	G3X987	0.172028	0.660061
Translation initiation factor eIF-2B subunit alpha	Eif2b1	Q99LC8	0.183285	0.658929
Far upstream element-binding protein 1 (Fragment)	Fubp1	A0A0G2JG96	0.00370712	0.647609
Tubulin alpha-3 chain	Tuba3a	P05214	0.171459	0.644931
Cytochrome c oxidase subunit 7A2, mitochondrial	Cox7a2	P48771	0.131375	0.644917
Glycerol-3-phosphate dehydrogenase 1-like protein	Gpd1l	Q3ULJ0	0.154797	0.644246
Keratin, type II cytoskeletal 2 epidermal	Krt2	Q3TTY5	0.175978	0.640134
Alpha globin 1	Hba-a1	Q91VB8	0.131503	0.637736
Multivesicular body subunit 12B (Fragment);Multivesicular body subunit 12B	Mvb12b	A2ARF0;Q6KAU4	0.0325159	0.634586
Cytochrome b-c1 complex subunit 9	Uqcr10	Q8R1I1	0.00573152	0.631915
Plasminogen receptor (KT)	Plgrkt	Q9D3P8	0.219496	0.628147
Unconventional prefoldin RPB5 interactor (Fragment);Unconventional prefoldin RPB5 interactor (Fragment);Unconventional prefoldin RPB5 interactor	Uri1	A0A0U1RNX4;A0A0U1RPG9;Q3TLD5	0.166578	0.62595
HAUS augmin-like complex subunit 7	Haus7	Q8BKT8	0.216021	0.624657
Gamma-tubulin complex component 3	Tubgcp3	P58854	0.00257588	0.624606
Serine/threonine-protein phosphatase 2A 56 kDa regulatory subunit gamma isoform	Ppp2r5c	Q60996	0.0344535	0.623223
Protein EVI2B	Evi2b	Q8VD58	0.0378286	0.622008
Geranylgeranyl transferase type-2 subunit alpha	Rabggta	Q9JHK4	0.0109088	0.621566
Predicted gene, EG210853	Zfp947	Q8BIQ6	0.0182424	0.619751
Predicted gene 21970 (Fragment);Interleukin-10 receptor subunit beta;Interleukin 10 receptor 2	Gm21970;Il10rb;Il10rb	F6XX07;Q61190;Q8VHM7	0.000535406	0.618595
X-ray repair cross-complementing protein 5	Xrcc5	P27641	0.0314543	0.606573
Uridine/cytidine kinase (Fragment);Uridine-cytidine kinase 2	Uck2	A0A0B4J1E5;Q99PM9	0.00591364	0.600445
Cytochrome c oxidase assembly factor 3 homolog, mitochondrial	Coa3	Q9D2R6	0.0148189	0.598424
Eukaryotic translation initiation factor 3 subunit M	Eif3m	Q99JX4	0.022636	0.595865
Polymerase delta-interacting protein 2 (Fragment);Polymerase delta-interacting protein 2	Poldip2	F6SQH7;Q91VA6	0.00557286	0.594925
Thymidine kinase, cytosolic	Tk1	P04184	0.0161911	0.590951
Integrin alpha-4;Alpha-4 integrin	Itga4	Q00651;Q792F9	0.11274	0.590786
Eukaryotic translation initiation factor 4E type 3	Eif4e3	Q9DBB5	0.0495973	0.586744
Dynein light chain 2, cytoplasmic	Dynll2	Q9D0M5	0.160718	0.576822
Striatin-interacting protein 1	Strip1	Q8C079	0.377752	0.574565
TERF1-interacting nuclear factor 2 (Fragment);TERF1-interacting nuclear factor 2;TERF1-interacting nuclear factor 2;TERF1-interacting nuclear factor 2	Tinf2	A0A2I3BRI7;A0A2I3BRL3;Q8K1K3;Q9QXG9	0.0614207	0.568215
Interferon gamma receptor 1	Ifngr1	P15261	0.0133286	0.563971
Galactose-3-O-sulfotransferase 4	Gal3st4	E9Q7N6;Q3V1B8	0.0162408	0.559553
Inactive hydroxysteroid dehydrogenase-like protein 1	Hsdl1	A0A1D5RLG0;Q8BTX9	0.0880155	0.559373
Dynein light chain Tctex-type 1A;Dynein light chain Tctex-type 1	Dynlt1a;Dynlt1	A0A338P7B7;P51807	0.0858029	0.556694
Exocyst complex component 4	Exoc4	O35382	0.944893	0.554804
Phosphatidylinositol 3-kinase catalytic subunit type 3	Pik3c3	D3YZ98;E9QLS6;Q6PF93	0.0128929	0.554533
DDB1- and CUL4-associated factor 7	Dcaf7	P61963	0.00787257	0.552932
Protein arginine N-methyltransferase 1	Prmt1	A0A171KXD3;Q9JIF0	0.00181973	0.549321
Zinc finger protein 330	Znf330	Q922H9	0.524719	0.546449
Galactose-1-phosphate uridylyltransferase	Galt	Q03249	0.00648244	0.542581
Ribosome-releasing factor 2, mitochondrial;Ribosome-releasing factor 2, mitochondrial	Gfm2	E9Q7N5;Q8R2Q4	0.0858146	0.540865
Cytosolic carboxypeptidase 1 (Fragment);Cytosolic carboxypeptidase 1 (Fragment);Cytosolic carboxypeptidase 1	Agtpbp1	E9PX07;F6ZCF0;Q641K1	0.0747494	0.540503
ER membrane protein complex subunit 10	Emc10	A0A0X1KG67;Q3TAS6	0.0215143	0.53906
Glucose 1,6-bisphosphate synthase	Pgm2l1	Q8CAA7	0.0126387	0.533917
F-actin-capping protein subunit beta	Capzb	A2AMW0	0.0111564	0.532578
Complex I-B14.7;NADH dehydrogenase [ubiquinone] 1 alpha subcomplex subunit 11	Ndufa11	G5E814;Q9D8B4	0.00684775	0.529948
NAD(+) kinase (Fragment);NAD kinase 2, mitochondrial (Fragment);NAD(+) kinase (Fragment);NAD kinase 2, mitochondrial	Nadk2	A0A7N9VS49;A0A7N9VT10;A0A7P0A156;Q8C5H8	0.0858759	0.527846
ETS translocation variant 3	Etv3	Q8R4Z4	0.384719	0.525648
Exocyst complex component 7	Exoc7	A2AAN0;O35250	0.137884	0.524703
Midasin	Mdn1	A2ANY6;J3QMC5	0.161106	0.523909
Mediator of RNA polymerase II transcription subunit 29	Med29	Q9DB91	0.393279	0.523484
2-oxoisovalerate dehydrogenase subunit alpha, mitochondrial;2-oxoisovalerate dehydrogenase subunit alpha	Bckdha	P50136;Q3U3J1	0.234407	0.522086
NPC intracellular cholesterol transporter 2	Npc2	Q9Z0J0	0.231276	0.52148
Inactive phospholipase C-like protein 1	Plcl1	Q3USB7	0.351791	0.52098
Translin	Tsn	Q62348	0.0195107	0.517652
Mitochondrial dicarboxylate carrier	Slc25a10	Q9QZD8	0.122207	0.517141
Very-long-chain (3R)-3-hydroxyacyl-CoA dehydratase 3	Hacd3	Q8K2C9	0.0106801	0.516181
Interferon-activable protein 205-B	Mnda	P0DOV1	0.51075	0.515577
Golgi-resident adenosine 3',5'-bisphosphate 3'-phosphatase	Bpnt2	Q80V26	0.200254	0.51427
Tyrosine-protein kinase;Tyrosine-protein kinase Fyn	Fyn	D3YZ57;P39688	0.113291	0.512673
Mth938 domain-containing protein (Fragment);Mth938 domain-containing protein (Fragment);Mth938 domain-containing protein;Mth938 domain-containing protein;Mth938 domain-containing protein;Mth938 domain-containing protein	Aamdc	D3YWY5;D3YY39;D3YZD8;D3Z1Q3;D3Z442;Q8R0P4	0.527887	0.512154
Immunoglobulin kappa chain variable 6-29;Immunoglobulin kappa chain variable 6-29 (Fragment);Immunoglobulin kappa variable 6-20 (Fragment);Ig kappa chain V-V region MOPC 21	Igkv6-29;Igkv6-29;Igkv6-20;	A0A075B5N2;A0A0G2JEI6;A0A140T8P2;P01634	0.175525	0.505532
Protein C-ets-1	Ets1	E9PWI8;P27577	0.00447562	0.504967
Ethylmalonyl-CoA decarboxylase	Echdc1	Q9D9V3	0.19912	0.502955
Cytosolic malate dehydrogenase (Fragment)	Mdh1	B1ATQ3	0.0821086	0.500137
Palmitoyl-protein thioesterase ABHD10, mitochondrial	Abhd10	Q6PE15	0.147955	0.49889
Protoporphyrinogen oxidase	Ppox	P51175	0.28102	0.494963
WASH complex subunit 3;Coiled-coil domain-containing protein 53	Washc3	Q9CR27;S4R287	0.103484	0.494062
SH2 domain-containing protein 2A	Sh2d2a	Q9QXK9	0.302858	0.493697
Ferritin	Ftl1	Q9CPX4	0.0265992	0.493404
Retinol dehydrogenase 11	Rdh11	Q9QYF1;Q9R1R8	0.0619109	0.491675
Protein virilizer homolog	Virma	A2AIV2;E9PZY8	0.10149	0.491556
ADP-ribosylation factor 1	Arf1	P84078	0.0552926	0.488531
Arsenite methyltransferase	As3mt	Q91WU5	0.0266279	0.488363
Nuclear receptor-interacting protein 2 (Fragment)	Nrip2	A0A0N4SUN5	0.0155468	0.485835
Transmembrane emp24 domain-containing protein 2 (Fragment);Transmembrane emp24 domain-containing protein 2 (Fragment);Transmembrane emp24 domain-containing protein 2	Tmed2	F6V6T4;Q8BPI2;Q9R0Q3	0.94423	0.483949
Dipeptidyl peptidase 1	Ctsc	P97821	0.399802	0.483075
RCR-type E3 ubiquitin transferase (Fragment);E3 ubiquitin-protein ligase MYCBP2 (Fragment);E3 ubiquitin-protein ligase MYCBP2	Mycbp2	F6SMY7;F6T4V9;Q7TPH6	0.263935	0.479843
NF-kappa-B inhibitor beta	Nfkbib	Q60778	0.597178	0.47807
Polypeptide N-acetylgalactosaminyltransferase 11	Galnt11	Q921L8	0.0038543	0.478024
Cation-transporting ATPase	Atp13a4	A0A0R4J0M2	0.0824564	0.477469
Checkpoint protein HUS1	Hus1	Q8BQY8	0.168162	0.477445
Immunoglobulin heavy constant mu (Fragment);Immunoglobulin heavy constant mu (Fragment);Immunoglobulin heavy constant mu	Ighm	A0A075B5P6;A0A075B6A0;P01872	0.121932	0.473354
Keratin 78	Krt78	E9Q0F0	0.936704	0.468994
Zinc finger protein 932;Zinc finger protein 951;Predicted gene 4924;Predicted gene 4924 (Fragment);Predicted gene, 17655;RIKEN cDNA A630089N07 gene;RIKEN cDNA B230307C23 gene;RIKEN cDNA A630089N07 gene;RIKEN cDNA A630089N07 gene;RIKEN cDNA B230307C23 gene;RIKEN cDNA B230307C23 gene;Predicted gene 14391;Predicted gene 14443;Predicted gene 14391;Predicted gene 15446;Zinc finger protein 97;RIKEN cDN…	Zfp932;Zfp951;Gm4924;Gm4924;Gm17655;A630089N07Rik;B230307C23Rik;A630089N07Rik;A630089N07Rik;B230307C23Rik;B230307C23Rik;Gm6710;Gm14443;Gm14391;Gm15446;Zfp97;4930522L14Rik;Znf431;Zfp951;Zfp932;Gm15446;Zfp960;B230307C23Rik;Gm4924;Zfp933;Zfp932;B230307C23Rik;A630089N07Rik;4930522L14Rik;Gm14391	A0A087WR27;A0A087WRH0;A0A1B0GR71;A0A1B0GRK6;A0A1B0GT13;A0A338P6D3;A0A338P6F4;A0A338P6J1;A0A338P6W5;A0A338P6Y4;A0A338P767;A2ART0;A2ARX0;A2ARX2;D3Z5Y8;E9PZP6;E9QAG4;E9QAG8;F8VPV1;K7N6R7;K7N6W1;L7N267;L7N467;Q1PA39;Q6PEE4;Q8BJ78;Q8BLB2;Q8BXW1;Q8C1G8;Q8C1K5	0.147107	0.468389
Translation initiation factor eIF-2B subunit epsilon	Eif2b5	Q8CHW4	0.194362	0.467301
Myosin light chain 3;Myosin light chain 3 (Fragment);Myosin light chain 3	Myl3	A0A0G2JDM3;A0A0G2JDW2;P09542	0.101914	0.465288
Polyprenol reductase	Srd5a3	F6WPW1;Q9WUP4	0.153285	0.463083
WD repeat domain phosphoinositide-interacting protein 4 (Fragment);WD repeat domain phosphoinositide-interacting protein 4 (Fragment);WD repeat domain phosphoinositide-interacting protein 4;WD repeat domain phosphoinositide-interacting protein 4 (Fragment);WD repeat domain phosphoinositide-interacting protein 4;WD repeat domain phosphoinositide-interacting protein 4;WD repeat domain phosphoinosit…	Wdr45	A0A0A0MQH0;A0A140LHM4;A0A140LHQ5;A0A140LHZ1;A0A140LI37;A0A140LIN0;A0A140LJ16;A0A140LJ74;A0A140LJ78;A0A140LJC8;A0A140LJG8;A0A140LJJ0;A2AEV2;F6Q8K5;F6QP00;F6YHS5;F7CAT9;Q91VM3;S4R186	0.0337245	0.462422
Proline and serine-rich protein 1	Proser1	Q5PRE5	0.0125021	0.460139
Carnosine N-methyltransferase	Carnmt1	Q80UY1	0.0194677	0.459542
Ubiquitin-like modifier-activating enzyme 5	Uba5	Q8VE47	0.0425538	0.456758
Transmembrane p24-trafficking protein 7	Tmed7	D3YZZ5;E9Q7G1	0.00339419	0.456209
Optic atrophy 3 protein homolog	Opa3	Q505D7	0.0783142	0.455789
Tyrosyl-DNA phosphodiesterase 1	Tdp1	B8JJC1;Q8BJ37	0.0345266	0.455207
Stomatin	Stom	P54116	0.743833	0.454151
Peflin	Pef1	Q8BFY6	0.00275646	0.450917
Protein farnesyltransferase/geranylgeranyltransferase type-1 subunit alpha	Fnta	Q61239	0.0767806	0.449166
Tricarboxylate transport protein, mitochondrial	Slc25a1	Q8JZU2	0.0708859	0.448672
Ras suppressor protein 1	Rsu1	A2AUR7;Q01730;Q9D031	0.000613179	0.447702
HEAT repeat-containing protein 5B	Heatr5b	Q8C547	0.118411	0.447422
Cytochrome c oxidase subunit 7C, mitochondrial	Cox7c	P17665	0.0353618	0.446352
SURP and G-patch domain-containing protein 1	Sugp1	Q8CH02	0.0343573	0.445875
26S proteasome non-ATPase regulatory subunit 14	Psmd14	O35593	0.0131492	0.445621
Epidermal growth factor receptor substrate 15-like 1	Eps15l1	A0A1D5RLS1;Q60902	3.19e-05	0.445503
Ras-related protein Rab-2A	Rab2a	P53994	0.0199026	0.44172
RIKEN cDNA 2610301B20 gene;Cilia- and flagella-associated protein 418	2610301B20Rik;Cfap418	B1AV75;Q3UJP5	0.85992	0.439745
Ubiquitin-protein ligase E3A	Ube3a	O08759	0.00104914	0.437483
Ras-related protein Rab-35	Rab35	Q6PHN9	0.227012	0.435551
Mediator of RNA polymerase II transcription subunit 30	Med30	Q9CQI9	0.045444	0.435153
Glucosamine-6-phosphate deaminase;Glucosamine-6-phosphate deaminase;Glucosamine-6-phosphate isomerase;Glucosamine-6-phosphate deaminase (Fragment);Glucosamine-6-phosphate isomerase 1;Glucosamine-6-phosphate isomerase 2	Gnpda1;Gnpda1;Gnpda2;Gnpda1;Gnpda1;Gnpda2	A0A494B9X2;A0A494BB68;D3YWR1;D3Z0R5;O88958;Q9CRC9	0.0457762	0.434798
Coatomer subunit zeta-1	Copz1	P61924	0.000347067	0.43471
Fatty acyl-CoA reductase (Fragment);Fatty acyl-CoA reductase (Fragment);Fatty acyl-CoA reductase 1	Far1	D3Z4N9;D3Z5W6;Q922J9	0.467826	0.434329
Ribosomal RNA small subunit methyltransferase NEP1	Emg1	O35130	0.0390402	0.43216
E3 ubiquitin-protein ligase MSL2	Msl2	A0A087WNL5;Q69ZF8	0.321123	0.43172
V-type proton ATPase subunit C 1	Atp6v1c1	Q9Z1G3	0.279969	0.430533
Xaa-Pro aminopeptidase 3	Xpnpep3	B7ZMP1	0.134818	0.430412
Histone chaperone ASF1A	Asf1a	A0A1W2P7K2;Q9CQE6	0.0849739	0.429741
Polycomb protein EED	Eed	A0A5F8MPX8;Q921E6	0.0300626	0.429283
Atlastin-3	Atl3	E9PYT3;Q91YH5	0.0720724	0.42878
Dynein light chain 1, cytoplasmic	Dynll1	P63168	0.0346386	0.425565
4'-phosphopantetheine phosphatase	Pank4	Q80YV4	0.0558134	0.425165
60S ribosome subunit biogenesis protein NIP7 homolog	Nip7	E9Q109;Q9CXK8	0.0767962	0.425077
Arrestin, beta 2;Beta-arrestin-2	Arrb2	Q5F2D9;Q91YI4	0.540577	0.424997
Ribosomal biogenesis protein LAS1L	Las1l	A2BE28	0.0424878	0.424174
Ubiquitin-conjugating enzyme E2 H	Ube2h	E9Q3U1;P62257	0.695797	0.423633
Vesicular integral-membrane protein VIP36	Lman2	Q9DBH5	0.230052	0.421906
Calcium-activated neutral proteinase small subunit;Calcium-activated neutral proteinase small subunit;Calpain small subunit 1	Capns1	A0A0R4IZW8;A0A0R4J1C2;O88456	0.217608	0.420356
Ubiquitin domain-containing protein UBFD1 (Fragment);Ubiquitin domain-containing protein UBFD1	Ubfd1	A0A0U1RQ55;Q78JW9	0.03544	0.41994
Oxysterol-binding protein;Oxysterol-binding protein;Oxysterol-binding protein-related protein 11	Osbpl11	A0A338P6F2;G5E8A0;Q8CI95	0.0012702	0.418204
Exosome complex exonuclease RRP42	Exosc7	Q9D0M0	0.00797503	0.418166
Non-structural maintenance of chromosomes element 1 homolog	Nsmce1	A0A0R4J0C0;Q9D720	0.0333301	0.417769
Probable aminopeptidase NPEPL1	Npepl1	Q6NSR8	0.0173353	0.416825
Queuosine salvage protein	2210016F16Rik	G3X8U3	0.000857406	0.41618
Sarcolemmal membrane-associated protein;Sarcolemmal membrane-associated protein (Fragment);Sarcolemmal membrane-associated protein (Fragment);Sarcolemmal membrane-associated protein (Fragment);Sarcolemmal membrane-associated protein;Sarcolemmal membrane-associated protein	Slmap	D3Z7V3;F6UV57;F6YCM8;F8WIH0;H7BX64;Q3URD3	0.39767	0.415384
Proline-, glutamic acid- and leucine-rich protein 1	Pelp1	Q9DBD5	0.321544	0.415005
Glyceraldehyde-3-phosphate dehydrogenase (Fragment)	Gapdh	S4R257	0.358576	0.414711
Cyclin-dependent kinase 13	Cdk13	Q69ZA1	0.106003	0.414073
Trafficking protein particle complex subunit 6B	Trappc6b	A0A1W2P6E6;Q9D289	0.444896	0.410765
Ras-related protein Rab-14	Rab14	Q91V41	0.0151397	0.408351
Protein PBDC1	Pbdc1	Q9D0B6	0.00341899	0.407201
Lambda-crystallin homolog	Cryl1	Q99KP3	0.0709022	0.405819
Ras-related protein Rab-6A	Rab6a	P35279	0.0322435	0.404702
Dolichol-phosphate mannosyltransferase subunit 1	Dpm1	A2BDX2;O70152	0.000613065	0.40329
Tetratricopeptide repeat protein 1	Ttc1	A2AJK8;Q91Z38	0.0663585	0.401622
Keratin, type I cytoskeletal 17	Krt17	Q9QWL7	0.0448161	0.401447
Succinate--CoA ligase [GDP-forming] subunit beta, mitochondrial	Suclg2	Q9Z2I8	0.00265863	0.399193
CDK5 regulatory subunit-associated protein 3	Cdk5rap3	Q99LM2	0.0565027	0.398561
Integrator complex subunit 4	Ints4	Q8CIM8	0.122433	0.398012
AP-1 complex subunit sigma-1A (Fragment);AP complex subunit sigma (Fragment);AP-1 complex subunit sigma-1A (Fragment);AP-1 complex subunit sigma-1A	Ap1s1	D3YXN0;D3Z0D6;D3Z268;P61967	0.0905311	0.397329
Chronophin	Pdxp	P60487	0.35324	0.39692
Importin-9	Ipo9	E9QKZ2;Q91YE6	0.0372172	0.39621
Derlin-1	Derl1	Q99J56	0.130382	0.395697
Aldo-keto reductase family 1 member C13	Akr1c13	Q8VC28	0.958294	0.395584
DCN1-like protein;DCN1-like protein 5	Dcun1d5	A0A1N9M8A6;Q9CXV9	0.00967559	0.394355
Mitochondrial potassium channel	Ccdc51	Q3URS9	0.998527	0.393446
Dihydroorotate dehydrogenase (quinone), mitochondrial (Fragment);Dihydroorotate dehydrogenase (quinone), mitochondrial;Dihydroorotate dehydrogenase (quinone), mitochondrial (Fragment);Dihydroorotate dehydrogenase (quinone), mitochondrial	Dhodh	D3YZY5;E9Q1V3;F6TCT7;O35435	0.052787	0.391267
ER membrane protein complex subunit 4	Emc4	Q9CZX9	0.157167	0.390687
Ribosomal RNA-processing protein 4 (Fragment);Exosome complex component RRP4	Exosc2	A2AV19;Q8VBV3	0.33587	0.390557
H1 histone family, member X	H1f10	Q80ZM5	0.062944	0.388896
Actin-related protein 2/3 complex subunit 2	Arpc2	Q9CVB6	0.00016207	0.388755
Keratin, type I cytoskeletal 10;Keratin, type I cytoskeletal 10	Krt10	A2A513;P02535	0.140835	0.38826
Aminoacyl tRNA synthase complex-interacting multifunctional protein 2	Aimp2	Q8R010	0.108417	0.387649
Vacuolar protein sorting-associated protein 45	Vps45	P97390	0.0114574	0.386464
Desumoylating isopeptidase 1	Desi1	D6RDE8;Q3TCG9;Q9CQT7	0.147152	0.386159
Synaptobrevin homolog YKT6	Ykt6	Q9CQW1	0.0773966	0.383941
cAMP-dependent protein kinase catalytic subunit alpha	Prkaca	P05132	0.297118	0.383941
Armadillo repeat-containing protein 6	Armc6	Q8BNU0	0.059094	0.381878
Equilibrative nucleoside transporter 4	Slc29a4	Q8R139	0.229107	0.381492
Cathepsin B	Ctsb	P10605	0.0184974	0.380468
Ras-related protein Rap-2c	Rap2c	Q8BU31	0.0166672	0.380246
Proteasome subunit beta type-4	Psmb4	P99026	0.025414	0.379709
DNA-directed RNA polymerase II subunit RPB7	Polr2g	P62488	0.105242	0.379158
ATPase GET3	Get3	O54984	0.047964	0.377721
Integrator complex subunit 10	Ints10	A0A0R4J0V1;E9Q360;E9Q361;Q8K2A7	0.0218318	0.37763
Guanine nucleotide-binding protein G(I)/G(S)/G(O) subunit gamma-10	Gng10	Q9CXP8	0.0111767	0.373049
Phosphatidylinositol 5-phosphate 4-kinase type-2 gamma	Pip4k2c	Q91XU3	0.519486	0.372976
Testis-expressed protein 30 (Fragment);Testis-expressed protein 30	Tex30	D3Z094;Q3TUU5	0.244568	0.37291
Glutamate-rich WD repeat-containing protein 1	Grwd1	Q810D6	0.0252852	0.372615
ESCRT-II complex subunit VPS25;ESCRT-II complex subunit VPS25;Vacuolar protein-sorting-associated protein 25	Vps25	A2A4K0;A8XY17;Q9CQ80	0.0461064	0.372606
[Pyruvate dehydrogenase [acetyl-transferring]]-phosphatase 1, mitochondrial;[Pyruvate dehydrogenase [acetyl-transferring]]-phosphatase 1, mitochondrial;[Pyruvate dehydrogenase [acetyl-transferring]]-phosphatase 1, mitochondrial;[Pyruvate dehydrogenase [acetyl-transferring]]-phosphatase 1, mitochondrial	Pdp1	A2AJP9;A2AJQ0;A8Y5Q0;Q3UV70	0.0697667	0.372584
WD repeat-containing protein 7	Wdr7	Q920I9	0.271554	0.372498
Semaphorin-4D	Sema4d	O09126	0.0327332	0.371531
NAD-dependent protein deacetylase;NAD-dependent protein deacetylase sirtuin-2	Sirt2	A0A140LHL5;Q8VDQ8	0.0185795	0.37147
Translocation protein SEC63 homolog	Sec63	Q8VHE0	0.00364701	0.367422
Unconventional myosin-Ic	Myo1c	Q9WTI7	0.0325474	0.366992
40S ribosomal protein S27 (Fragment);40S ribosomal protein S27	Rps27	A0A0G2JDW7;Q6ZWU9	0.0140387	0.36696
Histone-lysine N-methyltransferase EHMT2	Ehmt2	A2CG76;Q9Z148	0.0223035	0.366766
E3 ubiquitin-protein transferase MAEA	Maea	Q4VC33	0.00145415	0.366602
NEDD8-activating enzyme E1 catalytic subunit	Uba3	Q3TL72;Q8C878	0.0212091	0.36627
Replication factor C subunit 5	Rfc5	Q9D0F6	0.000504065	0.365326
UDP-glucose 6-dehydrogenase	Ugdh	O70475	0.604586	0.365041
ADP/ATP translocase 1	Slc25a4	P48962	0.0413198	0.365021
EARP and GARP complex-interacting protein 1 (Fragment);EARP and GARP complex-interacting protein 1;EARP and GARP complex-interacting protein 1	Eipr1	A0A1Y7VN36;A0A217FL60;Q8K0G5	0.135264	0.364832
Interferon regulatory factor 3 (Fragment);Interferon regulatory factor 3	Irf3	A0A140LHE6;P70671	0.00602498	0.363414
DNA repair endonuclease XPF	Ercc4	Q9QZD4	0.0612652	0.362941
DNA damage-binding protein 1	Ddb1	Q3U1J4	0.00220826	0.362072
U3 small nucleolar RNA-associated protein 15 homolog	Utp15	Q8C7V3	0.0953365	0.361938
Glyceraldehyde-3-phosphate dehydrogenase;Glyceraldehyde-3-phosphate dehydrogenase, testis-specific;Glyceraldehyde-3-phosphate dehydrogenase	Gapdhs	A0A0R4J0X7;Q64467;S4R2G5	0.42706	0.361288
Translational activator of cytochrome c oxidase 1	Taco1	Q8K0Z7	0.00678334	0.358484
Transmembrane protein 87A	Tmem87a	A2AQJ5;A2AQJ6;A2AQJ7;Q8BXN9	0.127617	0.358034
Ribose-phosphate pyrophosphokinase 2	Prps2	Q9CS42	0.0418199	0.357516
Uncharacterized protein C7orf50 homolog	NaN	Q9CXL3	0.280199	0.355235
Sulfite oxidase, mitochondrial	Suox	Q8R086	0.0338588	0.35497
Gasdermin-D	Gsdmd	Q9D8T2	0.0330651	0.354622
Dolichyl-diphosphooligosaccharide--protein glycotransferase	Stt3b	A0A0R4J0D3	0.0600668	0.35298
Integrator complex subunit 14	Ints14	Q8R3P6	0.00996746	0.352854
THO complex subunit 5 homolog	Thoc5	A0A0R4J0J6;Q8BKT7	0.0490831	0.352847
Eukaryotic translation initiation factor 3 subunit L	Eif3l	Q8QZY1	0.0087261	0.352786
COP9 signalosome complex subunit 2	Cops2	A2AQE4;P61202	0.0147581	0.351251
Sister chromatid cohesion protein DCC1	Dscc1;DSCC1	D3YVY9;Q14AI0	0.178075	0.350816
CCA tRNA nucleotidyltransferase 1, mitochondrial	Trnt1	Q8K1J6	0.0229502	0.350609
Casein kinase II subunit alpha	Csnk2a1	Q60737	0.0143494	0.349999
Putative tyrosine-protein phosphatase auxilin (Fragment);Putative tyrosine-protein phosphatase auxilin	Dnajc6	B1B0B7;Q80TZ3	0.354064	0.34899
Hypoxanthine-guanine phosphoribosyltransferase	Hprt1	P00493	0.00451579	0.346727
Cytosolic 5'-nucleotidase 3A	Nt5c3a	Q9D020	0.0729447	0.346545
Pre-mRNA-splicing factor 38B	Prpf38b	Q80SY5	0.0164668	0.344841
Nischarin	Nisch	Q80TM9	0.0586072	0.343694
ADP-ribosylation factor-like protein 2	Arl2	Q9D0J4	0.280991	0.342795
GDP-fucose protein O-fucosyltransferase 1	Pofut1	A2AMC3;Q91ZW2	0.0295504	0.341704
Glutathione transferase;Glutathione S-transferase Mu 1	Gstm1	A2AE89;P10649	0.336993	0.341271
Antithrombin-III (Fragment);Antithrombin-III	Serpinc1	A0A0A6YWH7;P32261	0.484716	0.341163
Ragulator complex protein LAMTOR4	Lamtor4	Q8CF66	0.150468	0.340647
Eukaryotic initiation factor 4A-I	Eif4a1	P60843	0.0171651	0.340434
Family with sequence similarity 98, member C;Family with sequence similarity 98, member C;Family with sequence similarity 98, member C (Fragment)	Fam98c	D3Z100;E9PYD1;F6ZXW2	0.294541	0.339392
Apoptotic protease-activating factor 1	Apaf1	G3XA09;O88879	0.011834	0.339048
26S proteasome non-ATPase regulatory subunit 2	Psmd2	Q8VDM4	0.0280888	0.338636
Branched-chain-amino-acid aminotransferase, mitochondrial;Branched-chain-amino-acid aminotransferase	Bcat2	O35855;O88374	0.0459269	0.337507
GDP-D-glucose phosphorylase 1	Gdpgp1	Q3TLS3	0.969656	0.337248
Phosphate carrier protein, mitochondrial	Slc25a3	Q8VEM8	0.0234591	0.336795
Ras-specific guanine nucleotide-releasing factor RalGPS2 (Fragment);Ras-specific guanine nucleotide-releasing factor RalGPS2;Ras-specific guanine nucleotide-releasing factor RalGPS2 (Fragment);Ras-specific guanine nucleotide-releasing factor RalGPS2;Ras-specific guanine nucleotide-releasing factor RalGPS2;Ras-specific guanine nucleotide-releasing factor RalGPS2;Ras-specific guanine nucleotide-rel…	Ralgps2	A0A087WPL3;A0A087WQ61;A0A087WQA4;A0A087WQU0;A0A0A6YXI6;Q8C134;Q9ERD6	0.0620092	0.336338
Bifunctional arginine demethylase and lysyl-hydroxylase JMJD6 (Fragment);Bifunctional arginine demethylase and lysyl-hydroxylase JMJD6 (Fragment);Bifunctional arginine demethylase and lysyl-hydroxylase JMJD6;Bifunctional arginine demethylase and lysyl-hydroxylase JMJD6	Jmjd6	F6VMC4;F6VRF7;G3UVU9;Q9ERI5	0.0241289	0.335693
Poly(A) RNA polymerase, mitochondrial	Mtpap	Q9D0D3	0.0512188	0.335101
ER membrane protein complex subunit 5	Mmgt1	Q8K273	0.183611	0.334922
ADP-ribose glycohydrolase MACROD1	Macrod1	Q922B1	0.11604	0.334801
Epidermal growth factor receptor substrate 15;Epidermal growth factor receptor substrate 15;Epidermal growth factor receptor substrate 15;Epidermal growth factor receptor pathway substrate 15 isoform B	Eps15	F6W2Q5;H3BK65;P42567;Q5JC28	0.0963549	0.334532
Serine/threonine-protein phosphatase;Serine/threonine-protein phosphatase;Serine/threonine-protein phosphatase;Serine/threonine-protein phosphatase 2B catalytic subunit beta isoform	Ppp3cb	E0CZ78;E9Q6P2;G3X8U7;P48453	0.293595	0.334121
LETM1 domain-containing protein 1	Letmd1	Q924L1	0.213022	0.333836
Transducin-like enhancer protein 3	Tle3	E0CXS2;E0CXU1;E0CY14;J3KMT7;Q08122;Q3TY99	0.252145	0.33304
Disks large-associated protein 5	Dlgap5	A0A0R4J0G7;A0A2I3BPW9;A0A2I3BQS1;Q8K4R9	0.0367586	0.333012
Predicted gene, 37240;Arfaptin-1	Gm37240;Arfip1	E9QAY5;G5E8V9	0.0366739	0.332825
Bcl-2-like protein 1 (Fragment);Apoptosis regulator Bcl-X (Fragment);Bcl-2-like protein 1;Apoptosis regulator Bcl-X (Fragment)	Bcl2l1	A2AHX8;A2AHX9;Q64373;Q9QWX2	0.115538	0.331845
ATP-dependent RNA helicase DDX39A	Ddx39a	Q8VDW0	0.0447626	0.331224
DNA fragmentation factor subunit beta	Dffb	O54788	0.127333	0.330739
CST complex subunit TEN1	Ten1	Q9D7K2	0.124486	0.330256
Lon protease homolog 2, peroxisomal	Lonp2	Q9DBN5	0.169205	0.329263
WD repeat-containing protein 55	Wdr55	Q9CX97	0.0768207	0.329225
Ubiquitin-conjugating enzyme E2 A	Ube2a	A0A0J9YTT1;A0A0J9YUN2;Q3TQ27;Q9Z255	0.0412999	0.328286
Protein PALS2	Pals2	Q9JLB0	0.313386	0.328221
NADH dehydrogenase [ubiquinone] 1 beta subcomplex subunit 11, mitochondrial	Ndufb11	O09111	0.0253622	0.328083
Serine/threonine-protein phosphatase 2A activator	Ptpa	P58389	0.00937483	0.328082
Eukaryotic translation initiation factor 3 subunit F	Eif3f	Q9DCH4	0.00800726	0.327841
CHK1 checkpoint homolog;Serine/threonine-protein kinase Chk1	Chek1	G3UYC5;O35280	0.397895	0.327778
NADH dehydrogenase [ubiquinone] iron-sulfur protein 3, mitochondrial	Ndufs3	Q9DCT2	0.0950316	0.326575
Protein lin-9 homolog;Protein lin-9 homolog (Fragment);Protein lin-9 homolog	Lin9	A0A0A6YVZ7;A0A0A6YWD3;Q8C735	0.126772	0.326413
Arylamine N-acetyltransferase 2	Nat2	P50295	0.0702014	0.32626
tRNA methyltransferase 10 homolog C	Trmt10c	Q3UFY8	0.283266	0.326215
Ubiquitin-conjugating enzyme E2 K	Ube2k	P61087	0.00150485	0.32595
NADPH oxidase 4 (Fragment);NADPH oxidase 4	Nox4	D3Z2E1;Q9JHI8	0.0337957	0.3255
Ig gamma-1 chain C region secreted form (Fragment);Ig gamma-1 chain C region secreted form (Fragment);Ig gamma-1 chain C region secreted form;Ig gamma-1 chain C region, membrane-bound form	Ighg1	A0A075B5P4;A0A0A6YWR2;P01868;P01869	0.711992	0.325303
Casein kinase II subunit alpha'	Csnk2a2	O54833	0.0272553	0.32496
E3 ubiquitin-protein ligase RBX1	Rbx1	P62878	0.235155	0.324761
Keratin, type I cytoskeletal 18	Krt18	P05784	0.506874	0.324166
Protein ABHD11	Abhd11	Q8K4F5	0.269503	0.323826
Receptor of activated protein C kinase 1	Rack1	P68040	0.00398802	0.322989
5'-3' exonuclease PLD3	Pld3	O35405	0.0541413	0.322267
Probable E3 ubiquitin-protein ligase HERC4	Herc4	Q6PAV2	0.0547289	0.321935
Metaxin-1;Metaxin-1 (Fragment);Metaxin-1;Metaxin	Mtx1	A0A6I8MWZ8;G3UXX9;P47802;Q8R5C0	0.0421128	0.321872
3-oxoacyl-[acyl-carrier-protein] reductase	Cbr4	Q91VT4	0.0298379	0.321531
Mannosyl-oligosaccharide glucosidase	Mogs	Q80UM7	0.0326499	0.321453
Cytochrome c oxidase assembly factor 7	Coa7	Q921H9	0.247123	0.320084
Ras-related protein Rab-5A	Rab5a	Q9CQD1	0.0216259	0.319679
Cohesin subunit SA-2	Stag2	A2AFF6;O35638	0.0616578	0.318121
Putative methyltransferase C9orf114 homolog	Spout1	Q3UHX9	0.0624212	0.318032
Ubiquitin carboxyl-terminal hydrolase 24;Ubiquitinyl hydrolase 1	Usp24	B1AY13;E9PV45	0.0404814	0.317881
Caspase-6	Casp6	O08738	0.0153145	0.317873
DCC-interacting protein 13-alpha	Appl1	Q8K3H0	0.00366056	0.317783
Non-specific serine/threonine protein kinase	Trp53rka	Q5U452	0.202702	0.317215
Small ubiquitin-related modifier 2	Sumo2	D3Z794;H7BWX9;P61957	0.0813584	0.317034
Sorting and assembly machinery component 50 homolog	Samm50	Q8BGH2	0.0666682	0.316777
Retinoblastoma-binding protein 5	Rbbp5	A0A0R4J2B6;Q8BX09	0.031764	0.316445
26S proteasome non-ATPase regulatory subunit 3	Psmd3	P14685	0.0107836	0.315691
Ribonuclease P protein subunit p30	Rpp30	O88796	0.0710164	0.315487
Beta-actin-like protein 2	Actbl2	Q8BFZ3	0.0693532	0.315239
Ubiquitin-conjugating enzyme E2 G2 (Fragment);Ubiquitin-conjugating enzyme E2 G2	Ube2g2	G3UZX2;P60605	0.159716	0.315189
Mitochondrial pyruvate carrier 2	Mpc2	Q9D023	0.0544521	0.314451
CLIP-associating protein 1	Clasp1	A0A087WNW8;A0A087WP42;A0A087WQ31;A0A087WQ95;A0A087WQF1;A0A087WRE8;A0A087WRK0;A0A087WS18;E9Q6L0;E9QKH0;E9QNY9;J3QP81;Q80TV8	0.00223819	0.314336
mRNA decay activator protein ZFP36L2;mRNA decay activator protein ZFP36L1	Zfp36l2;Zfp36l1	P23949;P23950	0.723464	0.313783
CDGSH iron-sulfur domain-containing protein 1	Cisd1	Q91WS0	8.48e-05	0.311338
ERO1-like protein alpha	Ero1a	Q8R180	0.116897	0.311217
Transmembrane protein 43	Tmem43	Q9DBS1	0.0304607	0.310961
Nuclear transcription factor Y subunit;Nuclear transcription factor Y subunit;Nuclear transcription factor Y subunit (Fragment);Nuclear transcription factor Y subunit (Fragment);Nuclear transcription factor Y subunit alpha;Nuclear transcription factor Y subunit	Nfya	A0A0R4J1Y8;E0CYF3;F6TWX0;F7DFJ2;P23708;Q9DBV7	0.230535	0.31079
Kelch domain-containing protein 4	Klhdc4	G3UZ63;G3UZG5;G3X961	0.186028	0.310514
Uridylate-specific endoribonuclease	Endou	Q3V188	0.230955	0.310382
Serine/threonine-protein phosphatase PP1-beta catalytic subunit	Ppp1cb	P62141	0.00385808	0.31019
F-box and leucine-rich protein 22	Fbxl22	Q8C7B6	0.606816	0.309944
Centromere protein I	Cenpi	Q8K1K4	0.384143	0.309922
Heat shock 70 kDa protein 13	Hspa13	Q8BM72	0.205706	0.309778
BRO1 domain-containing protein BROX	Brox	Q8K2Q7	0.000782957	0.309547
Probable ribosome biogenesis protein RLP24	Rsl24d1	Q99L28	0.162972	0.309458
Phosphatidylinositol transfer protein alpha isoform	Pitpna	P53810	0.10229	0.308904
Inositol monophosphatase 2	Impa2	Q91UZ5	0.142942	0.308798
Autophagy protein 5	Atg5	Q99J83	0.528066	0.307537
E3 ubiquitin-protein ligase PPP1R11;E3 ubiquitin-protein ligase PPP1R11 (Fragment);E3 ubiquitin-protein ligase PPP1R11	Ppp1r11	A5A4Y9;G3UZ30;Q8K1L5	0.23896	0.306401
Phosphatidylinositol-3-phosphatase SAC1	Sacm1l	A0A5F8MPK9;Q9EP69	0.0704594	0.306299
Dual specificity mitogen-activated protein kinase kinase 3	Map2k3	O09110	0.575164	0.30613
Platelet-activating factor acetylhydrolase IB subunit beta	Pafah1b1	P63005	0.00922642	0.305614
BRCA2 and CDKN1A-interacting protein	Bccip	Q9CWI3	0.0390135	0.305377
Pyridoxal kinase	Pdxk	Q8K183	0.0280251	0.304748
Vacuolar protein sorting-associated protein 35	Vps35	Q9EQH3	0.00133646	0.3043
Proto-oncogene vav	Vav1	E9PXI0;P27870	0.0040146	0.303996
F-box only protein 7	Fbxo7	Q3U7U3	0.166335	0.303262
Basic leucine zipper and W2 domain-containing protein 1	Bzw1	Q9CQC6	0.0221949	0.302217
AP-3 complex subunit sigma-1	Ap3s1	Q9DCR2	0.171006	0.300894
Heat shock factor-binding protein 1	Hsbp1	Q9CQZ1	0.0327218	0.30082
Dual specificity mitogen-activated protein kinase kinase 6	Map2k6	P70236	0.0571906	0.299766
Acyl-coenzyme A thioesterase THEM4	Them4	Q3UUI3	0.118981	0.299574
Transportin-3	Tnpo3	Q6P2B1	0.155494	0.299519
Thioredoxin-dependent peroxide reductase, mitochondrial	Prdx3	P20108	0.00256359	0.299102
Vacuolar protein-sorting-associated protein 36	Vps36	Q91XD6	0.0586331	0.298758
Dolichyl-diphosphooligosaccharide--protein glycosyltransferase 48 kDa subunit	Ddost	O54734	0.0152478	0.298202
Endoplasmic reticulum aminopeptidase 1	Erap1	Q9EQH2	0.0775987	0.296779
Probable cytosolic iron-sulfur protein assembly protein CIAO1	Ciao1	Q99KN2	0.232439	0.296406
Superoxide dismutase [Mn], mitochondrial	Sod2	P09671	0.0968499	0.2964
Predicted gene 7075;RING-box protein 2	Gm7075;Rnf7	D3Z497;Q9WTZ1	0.931287	0.296297
Deaminated glutathione amidase	Nit1	Q8VDK1	0.023421	0.295224
Origin recognition complex subunit 1	Orc1	Q9Z1N2	0.0762411	0.294938
Keratin, type II cytoskeletal 1	Krt1	P04104	0.53847	0.294474
Rho guanine nucleotide exchange factor 7;Rho guanine nucleotide exchange factor 7 (Fragment);Rho guanine nucleotide exchange factor 7	Arhgef7	A0A0R4J0X8;D3Z0V2;Q9ES28	0.688457	0.294308
CDGSH iron-sulfur domain-containing protein 2	Cisd2	Q9CQB5	0.0383716	0.294263
Dolichyl-diphosphooligosaccharide--protein glycosyltransferase subunit 2	Rpn2	A2ACG7;Q9DBG6	0.00744068	0.294242
M-phase phosphoprotein 6	Mphosph6	Q9D1Q1	0.102468	0.294203
Aldehyde dehydrogenase;Aldehyde dehydrogenase;Aldehyde dehydrogenase family 3 member A2	Aldh3a2	B1ATI0;B1AV77;P47740	0.70161	0.294155
N-acetylgalactosaminyltransferase 7	Galnt7	Q80VA0	0.0166877	0.293539
Active breakpoint cluster region-related protein	Abr	A0A571BG95;E9PUE7;Q5SSL4	0.112237	0.292521
Protein Jade-3	Jade3	A0A140T8R5;Q6IE82	0.598395	0.29231
E3 ubiquitin-protein ligase RNF126	Rnf126	Q91YL2	0.289558	0.290733
Lysophosphatidylserine lipase ABHD12	Abhd12	Q99LR1	0.266831	0.290361
U6 small nuclear RNA (adenine-(43)-N(6))-methyltransferase;RNA N6-adenosine-methyltransferase METTL16	Mettl16	Q5SW15;Q9CQG2	0.109841	0.290068
Diacylglycerol kinase epsilon	Dgke	Q9R1C6	0.341238	0.28978
N-alpha-acetyltransferase 15, NatA auxiliary subunit;N-alpha-acetyltransferase 15, NatA auxiliary subunit	Naa15	G3X8Y3;Q80UM3	0.00761819	0.289282
Purine nucleoside phosphorylase	Pnp	P23492;Q543K9	0.0995212	0.288982
Switch-associated protein 70	Swap70	Q6A028	0.917633	0.287471
Glycosylphosphatidylinositol anchor attachment 1 protein (Fragment);Glycosylphosphatidylinositol anchor attachment 1 protein (Fragment);Glycosylphosphatidylinositol anchor attachment 1 protein	Gpaa1	E9QA52;F6T7Y8;Q9WTK3	0.0170131	0.287412
Non-specific serine/threonine protein kinase;Non-specific serine/threonine protein kinase;Non-specific serine/threonine protein kinase;Non-specific serine/threonine protein kinase;Non-specific serine/threonine protein kinase;Non-specific serine/threonine protein kinase (Fragment);Serine/threonine-protein kinase MARK2;Non-specific serine/threonine protein kinase	Mark2	A0A0R4J0B1;A0A0R4J227;E9PYX3;E9Q9N6;E9QMP6;F6ZS70;Q05512;Q3T9A3	0.0135545	0.28694
Zinc finger CCCH-type with G patch domain-containing protein (Fragment);Zinc finger CCCH-type with G patch domain-containing protein	Zgpat	F7C2Y9;Q8VDM1	0.959529	0.286269
RNA helicase;ATP-dependent RNA helicase DDX55	Ddx55	E9Q9T6;Q6ZPL9	0.297662	0.285888
Proteasome subunit beta type-6	Psmb6	Q60692	0.116632	0.285804
Ubiquitin carboxyl-terminal hydrolase isozyme L5	Uchl5	Q9WUP7	0.000266286	0.28547
Fermitin family homolog 3	Fermt3	Q8K1B8	0.0195759	0.285202
Probable ubiquitin carboxyl-terminal hydrolase FAF-X;Ubiquitinyl hydrolase 1	Usp9x	P70398;Q4FE56	0.010001	0.285059
Keratin, type II cytoskeletal 8	Krt8	P11679	0.253792	0.284441
Complement component 1 Q subcomponent-binding protein, mitochondrial	C1qbp	Q8R5L1	0.253932	0.284346
Deoxynucleoside triphosphate triphosphohydrolase SAMHD1 (Fragment);Deoxynucleoside triphosphate triphosphohydrolase SAMHD1	Samhd1	F6TVP2;Q60710	0.36766	0.283974
Adenylosuccinate lyase	Adsl	P54822	0.0511601	0.282013
Cullin-associated NEDD8-dissociated protein 1	Cand1	Q6ZQ38	0.00990353	0.281582
Calcium/calmodulin-dependent protein kinase kinase 1 (Fragment);Calcium/calmodulin-dependent protein kinase kinase 1	Camkk1	B1AUD3;Q8VBY2	0.00480722	0.281291
COP9 signalosome complex subunit 4	Cops4	O88544	0.0660698	0.280339
Spermidine synthase	Srm	Q64674	0.0127529	0.280278
Histone deacetylase complex subunit SAP30L	Sap30l	Q5SQF8	0.212029	0.27985
Biliverdin reductase A	Blvra	Q9CY64	0.00320217	0.279317
AP-2 complex subunit alpha-2	Ap2a2	P17427	0.0248717	0.278764
ADP-ribosylation factor-like protein 8B	Arl8b	A0A0N4SVB8;Q9CQW2	0.0296569	0.278621
Thymidylate kinase	Dtymk	P97930	0.0414567	0.278224
Probable ATP-dependent RNA helicase DDX6	Ddx6	P54823	0.00017519	0.277929
Ribonuclease P protein subunit p20	Pop7	Q9DCH2	0.0870546	0.277863
Signal peptidase complex subunit 3	Spcs3	Q6ZWQ7	0.234283	0.277665
Protein HID1	Hid1	Q8R1F6	0.208805	0.277459
THO complex subunit 6 homolog	Thoc6	D3Z132;Q5U4D9	0.0242573	0.277189
Actin-like protein 6A	Actl6a	Q9Z2N8	0.00287623	0.276552
Methylmalonyl-CoA mutase, mitochondrial	Mmut	P16332	0.102466	0.276486
Regulator of cell cycle RGCC	Rgcc	Q9DBX1	0.529306	0.275744
WD repeat-containing protein 82	Wdr82	Q8BFQ4	0.127724	0.275689
ADP-ribosylation factor-like protein 3	Arl3	A0A494BAJ6;Q9WUL7	0.0953726	0.274476
Proteasome subunit beta type-8	Psmb8	P28063	0.0217148	0.27369
Calcium-binding mitochondrial carrier protein Aralar1	Slc25a12	Q8BH59	0.112282	0.273649
Eukaryotic translation initiation factor 2B, subunit 3;Eukaryotic translation initiation factor 2B, subunit 3;Eukaryotic translation initiation factor 2B, subunit 3	Eif2b3	B1AUN2;B1AUN3;Q3UKV0	0.129815	0.273472
Argininosuccinate lyase (Fragment);Argininosuccinate lyase (Fragment);Argininosuccinate lyase	Asl	E0CY49;E0CYV3;Q91YI0	0.263104	0.273428
Protein lin-7 homolog A	Lin7a	Q3TUM0;Q8JZS0	0.586194	0.273342
Cleavage and polyadenylation-specificity factor subunit 1;Cleavage and polyadenylation specificity factor subunit 1	Cpsf1	A0A2R8VK76;Q9EPU4	0.00840415	0.273067
Pyridoxal-dependent decarboxylase domain-containing protein 1	Pdxdc1	A0A0R4J034;Q99K01	0.0335274	0.272354
Heterogeneous nuclear ribonucleoprotein D0	Hnrnpd	G3X9W0;G5E8G0	0.13837	0.272156
Cilia- and flagella-associated protein 20	Cfap20	Q8BTU1	0.00337613	0.271994
17beta-hydroxysteroid dehydrogenase type 10/short chain L-3-hydroxyacyl-CoA dehydrogenase	Hsd17b10	Q99N15	0.0587427	0.271925
3-ketodihydrosphingosine reductase	Kdsr	Q6GV12	0.737409	0.271688
Protein unc-45 homolog A (Fragment)	Unc45a	D3YZN8	0.351264	0.271483
Coatomer subunit epsilon	Cope	O89079	0.0149818	0.270669
Vacuolar protein sorting-associated protein 29	Vps29	D3Z645;Q9QZ88	0.23528	0.270642
Ras GTPase-activating-like protein IQGAP2	Iqgap2	Q3UQ44	0.0685375	0.270395
MBT domain-containing protein 1	Mbtd1	A2ABG6;Q5NC75;Q6P5G3	0.229763	0.270057
Protein unc-45 homolog A	Unc45a	A0A5K1VVS7;Q99KD5	0.0720627	0.269439
Valyl-tRNA synthetase (Fragment);Valine--tRNA ligase, mitochondrial (Fragment);Valine--tRNA ligase, mitochondrial (Fragment);Valine--tRNA ligase, mitochondrial	Vars2	F6YJY2;F6Z939;F7A8L1;Q3U2A8	0.40739	0.268679
General transcription and DNA repair factor IIH helicase subunit XPD	Ercc2	E9Q6K1;O08811	0.594598	0.267824
General transcription factor IIIC, polypeptide 3	Gtf3c3	Q3TMP1	0.0310675	0.267618
Phosphoinositide phospholipase C;1-phosphatidylinositol 4,5-bisphosphate phosphodiesterase eta-1 (Fragment);Phosphoinositide phospholipase C (Fragment);Phosphoinositide phospholipase C;Phosphoinositide phospholipase C;Phosphoinositide phospholipase C;1-phosphatidylinositol 4,5-bisphosphate phosphodiesterase eta-1	Plch1	A0A0A0MQM2;E0CY47;H3BKE1;H3BKK4;I1E4X4;I1E4X6;Q4KWH5	0.00448279	0.267527
Adenosylhomocysteinase	Ahcy	P50247	0.0496043	0.2666
Phosphoinositide 3-kinase regulatory subunit 5	Pik3r5	Q5SW28	0.716272	0.266483
Clathrin heavy chain;Clathrin heavy chain 1	Cltc	Q5SXR6;Q68FD5	0.0183962	0.265893
[F-actin]-monooxygenase MICAL1	Mical1	Q8VDP3	0.0863541	0.265803
Ubiquitin carboxyl-terminal hydrolase 7	Usp7	F8VPX1;Q6A4J8	0.00632703	0.265645
Programmed cell death protein 6	Pdcd6	P12815	0.0119258	0.265369
BRISC and BRCA1-A complex member 2	Babam2	Q8K3W0	0.103853	0.264116
C-terminal-binding protein 1	Ctbp1	A0A0J9YU62;A0A0J9YUM4;O88712	0.000562359	0.263873
Cleavage and polyadenylation-specific factor 3-like protein;Integrator complex subunit 11	Ints11	A8Y5J3;Q9CWS4	0.495271	0.26386
Mitochondrial 2-oxoglutarate/malate carrier protein	Slc25a11	Q9CR62	0.398426	0.262623
Ras-related protein Rab-7a	Rab7a	P51150	0.0349864	0.262556
Recombining-binding protein suppressor of hairless;Recombining-binding protein suppressor of hairless;Recombining binding protein suppressor of hairless;Recombining-binding protein suppressor of hairless	Rbpj	A0A0J9YTV5;E9Q7W0;P31266;Q3U6F1	0.295912	0.261589
Interleukin enhancer-binding factor 2	Ilf2	Q9CXY6	0.0768201	0.260603
COP9 signalosome complex subunit 6	Cops6	D3Z0F5;O88545	0.0394859	0.260122
Malignant T-cell-amplified sequence 1	Mcts1	Q9DB27	0.0153586	0.25981
COP9 signalosome complex subunit 7a (Fragment);COP9 signalosome complex subunit 7a (Fragment);COP9 signalosome complex subunit 7a	Cops7a	D3YVI6;D3Z440;Q9CZ04	0.111078	0.258987
Ras-related protein Rab-5C	Rab5c	P35278	0.0566979	0.258939
Lysine-specific demethylase PHF2	Phf2	Q9WTU0	0.0598064	0.258335
Proteasome subunit alpha type-3	Psma3	O70435	0.0405118	0.25801
Sulfhydryl oxidase 2	Qsox2	Q3TMX7	0.28463	0.257846
Metastasis-associated protein MTA3	Mta3	E9Q794;Q3U3A7;Q3UII8;Q924K8	0.0424801	0.257639
NADH dehydrogenase [ubiquinone] iron-sulfur protein 2, mitochondrial	Ndufs2	Q91WD5	0.0862787	0.25731
Choline/ethanolaminephosphotransferase 1 (Fragment);Choline/ethanolaminephosphotransferase 1 (Fragment);Choline/ethanolaminephosphotransferase 1 (Fragment);Choline/ethanolaminephosphotransferase 1	Cept1	A0A0A6YXR0;D3YX12;D3Z5Y5;Q8BGS7	0.399884	0.257276
Ubiquitin-associated and SH3 domain-containing protein A	Ubash3a	A0A498WGR9;Q3V3E1	0.419387	0.257193
Pseudouridylate synthase 7 homolog	Pus7	Q91VU7	0.367351	0.256447
Serine/threonine-protein phosphatase 2A catalytic subunit alpha isoform	Ppp2ca	P63330	0.000760566	0.255827
B-cell receptor-associated protein 31	Bcap31	Q61335	0.0309566	0.255711
Dynamin-2;Dynamin GTPase	Dnm2	P39054;Q3T9X3	0.0715004	0.255564
Selenoprotein S	Selenos	A0A0U1RP62;A0A0U1RPI8;Q9BCZ4	0.122697	0.255072
Signal sequence receptor subunit alpha;Signal sequence receptor subunit alpha;Signal sequence receptor subunit alpha (Fragment);Translocon-associated protein subunit alpha	Ssr1	A0A286YCG8;A0A286YCT4;A0A286YDB7;Q9CY50	0.686578	0.254308
Ras-related protein Rab-18	Rab18	A0A3Q4EI12;P35293	0.342936	0.254023
CMP-N-acetylneuraminic acid synthase	Cmas	A0A0R4J0B4	0.133494	0.253583
PRA1 family protein 2	Praf2	Q9JIG8	0.0633584	0.253427
PAN2-PAN3 deadenylation complex catalytic subunit Pan2	Pan2	Q8BGF7	0.033553	0.253306
Cytochrome b-c1 complex subunit 2, mitochondrial	Uqcrc2	Q9DB77	0.00873004	0.253015
LanC-like protein 2 (Fragment);LanC-like protein 2	Lancl2	F6RJV6;Q9JJK2	0.0280606	0.252936
Exportin-1	Xpo1	Q6P5F9	0.0174819	0.252432
Protein FAM91A1	Fam91a1	Q3UVG3	0.279498	0.252241
Tetratricopeptide repeat protein 38	Ttc38	A3KMP2	0.379113	0.252216
Nuclear pore complex protein Nup155	Nup155	A0A2R8VHH1;Q99P88	0.0342761	0.251922
Glutamate--cysteine ligase regulatory subunit	Gclm	O09172	0.0495232	0.25174
Poly(A) polymerase;Poly(A) polymerase;Poly(A) polymerase;Poly(A) polymerase alpha	Papola	E9PWC8;E9PZR3;E9QAN2;Q61183	0.0560177	0.251729
Centromere protein X	Cenpx	Q8C4X1	0.241574	0.251371
Mitochondrial glutamate carrier 1 (Fragment);Mitochondrial glutamate carrier 1 (Fragment);Mitochondrial glutamate carrier 1 (Fragment);Mitochondrial glutamate carrier 1 (Fragment);Mitochondrial glutamate carrier 1;Mitochondrial glutamate carrier 1;Mitochondrial glutamate carrier 1;Mitochondrial glutamate carrier 1;Mitochondrial glutamate carrier 1 (Fragment)	Slc25a22	A0A0J9YTY6;A0A0J9YVJ3;E9PV90;E9PY45;E9Q579;E9Q6M6;Q80X52;Q9D6M3;V9GWS2	0.242806	0.251213
Protein CBFA2T2;Protein CBFA2T2 (Fragment);Protein CBFA2T2	Cbfa2t2	A0A0R4J1D5;F6WYU8;O70374	0.808231	0.251145
FERM domain-containing protein 8 (Fragment);FERM domain-containing protein 8	Frmd8	D3Z5B2;Q3UFK8	0.693374	0.250866
Cullin-4A	Cul4a	Q3TCH7	0.127417	0.250235
T-cell surface glycoprotein CD3 epsilon chain	Cd3e	P22646	0.084412	0.250091
Nucleoporin NUP188	Nup188	Q6ZQH8	0.886256	0.249567
Solute carrier family 12 member 7	Slc12a7	Q9WVL3	0.0959205	0.249419
Eukaryotic translation initiation factor 3 subunit E	Eif3e	P60229	0.00562593	0.249096
Mitotic spindle assembly checkpoint protein MAD2A	Mad2l1	Q9Z1B5	0.145404	0.24887
ATP-dependent dihydroxyacetone kinase;Triokinase/FMN cyclase	Tkfc	Q3UTZ4;Q8VC30	0.0325853	0.24868
Sulfide:quinone oxidoreductase, mitochondrial	Sqor	Q9R112	0.0887037	0.247913
26S proteasome non-ATPase regulatory subunit 13	Psmd13	Q9WVJ2	0.000401826	0.247899
L-aminoadipate-semialdehyde dehydrogenase-phosphopantetheinyl transferase	Aasdhppt	A0A1D5RL91;Q9CQF6	0.0761566	0.247711
Palmitoyl-protein thioesterase 1	Ppt1	O88531	0.0651402	0.247572
Cytoplasmic FMR1-interacting protein 2	Cyfip2	Q5SQX6	0.0700437	0.24748
NPC intracellular cholesterol transporter 1	Npc1	O35604	0.871098	0.24748
AP-2 complex subunit beta	Ap2b1	Q9DBG3	0.000406939	0.24733
NudC domain-containing protein 1	Nudcd1	A0A2K6EDK3;Q6PIP5	0.303179	0.246963
Non-structural maintenance of chromosomes element 4	Nsmce4a	G3XA30	0.105452	0.24661
GTPase IMAP family member 4	Gimap4	Q99JY3	0.526192	0.246375
Inositol 1,4,5-trisphosphate receptor type 2	Itpr2	Q9Z329	0.106637	0.246354
ATP synthase subunit gamma	Atp5c1	Q8C2Q8	0.0151633	0.24606
Serine/arginine repetitive matrix protein 2 (Fragment)	Srrm2	A0A087WRX8	0.692041	0.245758
Phosphatidylinositol-3,5-bisphosphate 3-phosphatase;Myotubularin-related protein 2	Mtmr2	Q6P572;Q9Z2D1	0.555784	0.24571
Golgi resident protein GCP60	Acbd3	A0A0R4J079;Q8BMP6	0.142591	0.245467
Sister chromatid cohesion protein PDS5 homolog B	Pds5b	F8WHU5;Q4VA53	0.0312981	0.245309
Katanin p60 ATPase-containing subunit A1;Katanin p60 ATPase-containing subunit A1;Katanin p60 ATPase-containing subunit A-like 1;Katanin p60 ATPase-containing subunit A1	Katna1;Katna1;Katnal1;Katna1	E9PZI6;E9QKG2;Q8K0T4;Q9WV86	0.211746	0.244809
THO complex subunit 2	Thoc2	B1AZI6	0.116086	0.243966
Zinc finger protein 512B;Zinc finger protein 512B (Fragment)	Zfp512b	B7ZCR6;Q6PHP4	0.700061	0.243852
Uridine 5'-monophosphate synthase	Umps	P13439	0.0487118	0.243568
Segment polarity protein dishevelled homolog DVL-2	Dvl2	Q60838	0.432337	0.243547
Nucleoporin Nup37	Nup37	Q9CWU9	0.0199467	0.242948
Testin	Tes	Q3ULB1;Q921W7	0.54184	0.242943
Rab GDP dissociation inhibitor beta	Gdi2	Q61598	5.76e-05	0.242476
Histone H2B type 3-B	H2bu1	Q8CGP0	0.118423	0.24229
Acetyl-coenzyme A synthetase 2-like, mitochondrial	Acss1	Q99NB1	0.0351298	0.242263
Estradiol 17-beta-dehydrogenase 11	Hsd17b11	Q9EQ06	0.31494	0.241839
Pre-mRNA-splicing factor 38A	Prpf38a	Q4FK66	0.125449	0.241752
Translocon-associated protein subunit delta;Signal sequence receptor subunit delta	Ssr4	Q62186;Q9D8L3	0.583593	0.241393
B-cell lymphoma/leukemia 10	Bcl10	Q9Z0H7	0.0368621	0.240941
Albumin	Alb	P07724	0.00404487	0.240744
Cytochrome c oxidase subunit 2	Mtco2	P00405	0.0027583	0.240143
Glutaredoxin-3	Glrx3	Q9CQM9	0.0395465	0.239938
Actin-related protein 8	Actr8	Q8R2S9	0.338953	0.239463
2'-deoxynucleoside 5'-phosphate N-hydrolase 1	Dnph1	Q80VJ3	0.000225092	0.239414
Bone marrow proteoglycan	Prg2	Q61878	0.312447	0.239173
Vacuolar protein sorting-associated protein 53 homolog	Vps53	E9PXG9;E9PYD3;Q8CCB4	0.0190276	0.239166
Keratin 90	Krt90	E9Q1Z0	0.656502	0.238805
Outer mitochondrial membrane protein porin 2	Vdac2	G3UX26	0.0587387	0.238546
Ras-related protein Rap-1b	Rap1b	Q99JI6	0.00342014	0.238223
Exopolyphosphatase PRUNE1	Prune1	Q8BIW1	0.212404	0.237749
T cell receptor beta, constant region 1;T cell receptor beta, constant 2 (Fragment);T cell receptor beta, constant region 1 (Fragment);T-cell receptor beta-2 chain C region;T-cell receptor beta-1 chain C region	Trbc1;Trbc2;Trbc1;;	A0A075B5J3;A0A075B5J4;A0A0A6YWV4;P01851;P01852	0.671801	0.23654
Ras-related protein Rab-11A;Ras-related protein Rab-11A (Fragment);Ras-related protein Rab-11B;Ras-related protein Rab-11B;Ras-related protein Rab-11A	Rab11a;Rab11a;Rab11b;Rab11b;Rab11a	E9Q3P9;F8WGS1;G3UY29;P46638;P62492	0.0243175	0.234127
Bleomycin hydrolase	Blmh	Q8R016	0.147936	0.233788
Vesicle transport protein SEC20	Bnip1	Q6QD59	0.529269	0.233713
Translin-associated protein X	Tsnax	Q9QZE7	0.0609932	0.23335
RNA 3'-terminal phosphate cyclase-like protein	Rcl1	A0A494BAM2;Q9JJT0	0.487799	0.233241
Ragulator complex protein LAMTOR2	Lamtor2	Q9JHS3	0.0340023	0.232094
Delta(3,5)-Delta(2,4)-dienoyl-CoA isomerase, mitochondrial	Ech1	O35459	0.124217	0.232076
PCI domain-containing protein 2	Pcid2	E9Q1H5;Q8BFV2	0.690722	0.232056
Isopentenyl-diphosphate Delta-isomerase 1	Idi1	P58044	0.0230681	0.231525
Protein archease	Zbtb8os	B2KGA7;Q505B7	0.115956	0.231399
Alpha-soluble NSF attachment protein	Napa	Q9DB05	0.0102644	0.231174
DNA polymerase epsilon subunit;DNA polymerase epsilon subunit 2	Pole2	A0A1Y7VN66;O54956	0.177646	0.231141
Histone acetyltransferase type B catalytic subunit	Hat1	A2ATU9;Q8BY71	0.0488422	0.23109
Proteasome subunit beta type-3	Psmb3	Q9R1P1	0.0722835	0.230962
SWI/SNF-related matrix-associated actin-dependent regulator of chromatin subfamily D member 2	Smarcd2	Q99JR8	0.0413284	0.230483
Transcription factor 7	Tcf7	A0A5K1VVQ7;Q00417	0.00736666	0.23043
Serine/threonine-protein phosphatase 2A 56 kDa regulatory subunit	Ppp2r5d	Q7TNL5;Q91V89	0.178507	0.230313
CTP:phosphoethanolamine cytidylyltransferase;Ethanolamine-phosphate cytidylyltransferase	Pcyt2	A2ABY3;Q922E4	0.790805	0.230194
Rap1 GTPase-GDP dissociation stimulator 1	Rap1gds1	E9Q912	0.393136	0.230143
DNA-directed RNA polymerase II subunit RPB11	Polr2j	D3YZ20;O08740;Q6PI63	0.301779	0.22927
Importin-5	Ipo5	Q8BKC5	0.0543152	0.229238
Heat shock 70 kDa protein 14	Hspa14	Q99M31	0.0877468	0.228767
Coactosin-like protein	Cotl1	Q9CQI6	0.0690656	0.227936
Aldo-keto reductase family 1, member B10 (aldose reductase)	Akr1b10	G5E895	0.345165	0.227496
Mitochondrial import receptor subunit TOM40 homolog	Tomm40	Q9QYA2	0.221055	0.227374
U4/U6 small nuclear ribonucleoprotein Prp31	Prpf31	Q8CCF0	0.03364	0.226435
Protein FAM168A	Fam168a	A0A140LIJ1;Q8BGZ2	0.00222707	0.226426
Centrosomal protein of 41 kDa	Cep41	H9KUZ8;Q99NF3	0.466922	0.225967
ER membrane protein complex subunit 1	Emc1	Q8C7X2;Z4YJW0	0.0877012	0.225843
Uncharacterized protein KIAA2013	Kiaa2013	Q91X21	0.34329	0.225378
Eukaryotic initiation factor 4A-III	Eif4a3	Q91VC3	0.0125481	0.225251
Casein kinase I isoform alpha	Csnk1a1	E9PWB2;E9Q4G7;H7BXB1;Q8BK63	0.0325328	0.225191
Pre-B-cell leukemia transcription factor 2	Pbx2	O35984;Q3UR63;V9GXB8	0.538011	0.224569
Ferrochelatase;Ferrochelatase;Ferrochelatase, mitochondrial (Fragment);Ferrochelatase;Ferrochelatase, mitochondrial;Ferrochelatase;Ferrochelatase	Fech	A0A494B9Y8;A0A494BAI5;A0A494BBL4;F6T2S0;P22315;Q544X6;Q91W09	0.95249	0.224512
V-type proton ATPase subunit d 1	Atp6v0d1	P51863	0.250789	0.224409
Prohibitin-2	Phb2	O35129	0.0122738	0.224317
Signal recognition particle 9 kDa protein	Srp9	P49962	0.0396439	0.223605
V-type proton ATPase subunit H	Atp6v1h	A0A0A6YWP6;A0A0A6YX18;Q8BVE3	0.00683506	0.223428
Acyl-protein thioesterase 1	Lypla1	P97823	0.00557208	0.223064
DNA-directed RNA polymerase III subunit RPC3 (Fragment);DNA-directed RNA polymerase III subunit RPC3	Polr3c	F6QK97;Q9D483	0.82626	0.22277
Protein mono-ADP-ribosyltransferase PARP3	Parp3	Q3ULW8	0.243548	0.222737
Protein FAM98A	Fam98a	A0A3Q4EBV4;Q3TJZ6	0.0612813	0.222642
Ubiquitin-like domain-containing CTD phosphatase 1	Ublcp1	Q8BGR9	0.338501	0.222602
NADH dehydrogenase [ubiquinone] 1 beta subcomplex subunit 2, mitochondrial	Ndufb2	Q9CPU2	0.475512	0.221934
Poly(A)-specific ribonuclease PARN	Parn	A0A0R4J0P6;Q8VDG3	0.208245	0.221651
Serine/threonine-protein phosphatase PP1-alpha catalytic subunit	Ppp1ca	P62137	0.156524	0.221607
Protein TASOR	Tasor	Q69ZR9	0.0723191	0.221051
COP9 signalosome complex subunit 8	Cops8	Q8VBV7	0.0213736	0.22073
Cell division control protein 45 homolog	Cdc45	F8WJ72;Q9Z1X9	0.0215299	0.220381
Hydroxymethylglutaryl-CoA synthase, cytoplasmic	Hmgcs1	Q8JZK9	0.0210649	0.219972
Thioredoxin, mitochondrial;Thioredoxin, mitochondrial (Fragment);Thioredoxin, mitochondrial (Fragment);Thioredoxin, mitochondrial	Txn2	A2A439;G3UX99;G3UZY2;P97493	0.56541	0.219963
Protein phosphatase 1F	Ppm1f	Q8CGA0	0.122789	0.219913
Endoplasmic reticulum transmembrane helix translocase	Atp13a1	Q9EPE9	0.0971729	0.219494
tRNA (guanine(37)-N1)-methyltransferase	Trmt5	Q9D0C4	0.802191	0.219485
Anoctamin-10;Anoctamin;Anoctamin-10	Ano10	A0A1L1SR14;A0A1L1SS60;Q8BH79	0.056713	0.219201
Sterol-4-alpha-carboxylate 3-dehydrogenase, decarboxylating	Nsdhl	Q9R1J0	0.17829	0.219137
Jupiter microtubule associated homolog 2	Jpt2	Q6PGH2	0.0903138	0.219049
CCR4-NOT transcription complex subunit 7	Cnot7	Q60809	0.744799	0.218842
Trafficking protein particle complex subunit 5	Trappc5	Q9CQA1	0.00425184	0.218828
AP-3 complex subunit mu-1	Ap3m1	A0A286YDZ6;H7BWY2;Q9JKC8	0.139321	0.218073
Medium-chain specific acyl-CoA dehydrogenase, mitochondrial	Acadm	P45952	0.117807	0.217874
Cyclin-G-associated kinase	Gak	A0A0R4J0F6;Q99KY4	0.0864865	0.217571
Dynactin subunit 3	Dctn3	Q9Z0Y1	0.0639605	0.217482
Nodal modulator 1	Nomo1	Q6GQT9	0.279117	0.217279
Eukaryotic translation initiation factor 3 subunit B	Eif3b	Q8JZQ9	0.00498757	0.217278
Protein FAM76A	Fam76a	Q922G2	0.0318154	0.216672
Thioredoxin-interacting protein	Txnip	Q8BG60	0.028689	0.216581
Threonylcarbamoyladenosine tRNA methylthiotransferase	Cdkal1	Q91WE6	0.141437	0.216271
NADH-cytochrome b5 reductase;NADH-cytochrome b5 reductase 3	Cyb5r3	F2Z456;Q9DCN2	0.14383	0.216146
Dolichyl-diphosphooligosaccharide--protein glycosyltransferase subunit MAGT1;Magnesium transporter protein 1	Magt1	A2ADH1;Q9CQY5	0.00072005	0.215869
Choline transporter-like protein 2	Slc44a2	A0A1L1SVG6;Q8BY89	0.36285	0.215849
Src kinase-associated phosphoprotein 1	Skap1	Q3UUV5	0.00677866	0.215818
Retinol dehydrogenase 14	Rdh14	Q9ERI6	0.872076	0.215266
Hydroxyacyl-coenzyme A dehydrogenase, mitochondrial	Hadh	Q61425	0.183224	0.214794
IST1 homolog	Ist1	Q9CX00	0.121565	0.214725
Sodium/hydrogen exchanger 1	Slc9a1	Q61165	0.617845	0.214634
RNA transcription, translation and transport factor protein	RTRAF	Q9CQE8	0.007529	0.213576
Complex I-SGDH (Fragment);Complex I-SGDH;Complex I-SGDH;Complex I-SGDH (Fragment);NADH dehydrogenase [ubiquinone] 1 beta subcomplex subunit 5, mitochondrial	Ndufb5	D3YX99;D3Z568;D3Z6W9;F6Y6V5;Q9CQH3	0.0238644	0.213312
ATP-binding cassette sub-family F member 3	Abcf3	Q8K268	0.0100226	0.213303
Probable ATP-dependent RNA helicase DDX20	Ddx20	Q9JJY4	0.0823666	0.213061
Zinc finger protein 830	Znf830	Q8R1N0	0.0273994	0.213018
26S proteasome non-ATPase regulatory subunit 1	Psmd1	Q3TXS7	0.0227306	0.213006
Transcription factor Sp2	Sp2	Q8BNQ4;Q8C5J0;Q9D2H6	0.80157	0.212964
Ras-related protein Rab-10	Rab10	P61027	0.225033	0.212863
Glucocorticoid receptor (Fragment);Glucocorticoid receptor	Nr3c1	E9Q310;P06537	0.0667668	0.212786
FAS-associated factor 1	Faf1	P54731	0.119842	0.212128
Nuclear receptor-binding protein	Nrbp1	D3YUV1;Q99J45	0.00124936	0.212096
RING1 and YY1-binding protein	Rybp	Q8CCI5	0.000891807	0.211813
Chromosome segregation 1-like protein;Exportin-2	Cse1l	E9Q1T9;Q9ERK4	0.00991272	0.211716
Protein unc-119 homolog B	Unc119b	Q8C4B4	0.00875624	0.21158
BTB/POZ domain-containing protein KCTD1 (Fragment);BTB/POZ domain-containing protein KCTD21;BTB/POZ domain-containing protein KCTD1;BTB/POZ domain-containing protein KCTD21;BTB/POZ domain-containing protein KCTD1	Kctd1;Kctd21;Kctd1;Kctd21;Kctd1	A0A3Q4EG48;B2RTJ2;E9Q6T9;Q3URF8;Q5M956	0.0118416	0.211263
ATP synthase F(0) complex subunit B1, mitochondrial	Atp5pb	Q9CQQ7	0.0116579	0.211152
Non-histone chromosomal protein HMG-14	Hmgn1	P18608	0.252691	0.211097
Pleiotropic regulator 1	Plrg1	D3Z4V1;Q922V4	0.211365	0.210968
Synaptic vesicle membrane protein VAT-1 homolog	Vat1	Q62465	0.0319867	0.210676
Transmembrane emp24 domain-containing protein 5	Tmed5	D3Z615;E9PXY3;E9Q2J2;Q3V440;Q8C5H9;Q9CXE7	0.0994083	0.209802
Importin-7	Ipo7	Q9EPL8	0.0660939	0.209479
Synembryn-A (Fragment);Synembryn-A	Ric8a	A0A1B0GSI8;Q3TIR3	0.602604	0.208871
39S ribosomal protein L10, mitochondrial;39S ribosomal protein L10, mitochondrial	Mrpl10	A2A715;Q3TBW2	0.0718327	0.208758
Serine/threonine-protein phosphatase 4 regulatory subunit 3A	Ppp4r3a	E9Q481;Q6P2K6	0.0468437	0.208536
MARCKS-related protein	Marcksl1	P28667	0.692992	0.2082
Pre-mRNA-splicing factor SLU7	Slu7	Q8BHJ9	0.13717	0.208031
Brain-specific angiogenesis inhibitor 1-associated protein 2	Baiap2	B1AZ46;Q8BKX1	0.658562	0.20777
Splicing factor 3B subunit 3	Sf3b3	Q921M3	0.00541184	0.207494
Golgi phosphoprotein 3-like	Golph3l	H3BJ07;Q8R088	0.485118	0.207481
Pre-mRNA-splicing factor CWC25 homolog	Cwc25	Q9DBF7	0.69731	0.207281
Centriolin;Centriolin;Centriolin;Centriolin (Fragment)	Cntrl	A2AL36;E9Q9E7;R4GML3;R4GML4	0.814158	0.207238
Elongin-C (Fragment);Elongin-C	Eloc	A0A087WQE6;P83940	0.0254045	0.207154
SAM and SH3 domain-containing protein 3	Sash3	Q8K352	0.0163713	0.206623
WD40 repeat-containing protein SMU1	Smu1	Q3UKJ7	0.0512202	0.206421
ATP-dependent RNA helicase DDX3Y	Ddx3y	Q62095	0.302375	0.206384
Leucine-rich repeat-containing protein 57 (Fragment);Leucine rich repeat containing 57;Leucine-rich repeat-containing protein 57	Lrrc57	A2AKH7;Q8JZX5;Q9D1G5	0.0187549	0.20605
Complex I-9kD	Ndufv3	Q3U422	0.157663	0.205906
Peptidylprolyl isomerase (Fragment);FK506-binding protein 15;Peptidylprolyl isomerase	Fkbp15	A0A6I8MWZ0;Q6P9Q6;Q80YW9	0.256275	0.205904
NAD(P) transhydrogenase, mitochondrial	Nnt	Q61941	0.00330606	0.205857
Copine-1	Cpne1	Q8C166	0.0124963	0.205655
Cytosolic endo-beta-N-acetylglucosaminidase	Engase	Q8BX80	0.187609	0.205352
Kinetochore protein Spc24	Spc24	A0A1L1SV84;Q9D083	0.165853	0.204056
RNA helicase	Dhx16	G3X8X0	0.139224	0.203739
Inositol-3-phosphate synthase 1	Isyna1	Q9JHU9	0.349925	0.203177
Serine/threonine-protein phosphatase 6 regulatory ankyrin repeat subunit A	Ankrd28	A0A2I3BQ07;A0A2I3BQJ1;Q505D1	0.93072	0.20276
Vacuolar protein sorting-associated protein 13C	Vps13c	Q8BX70	0.148815	0.202495
Dolichyl-diphosphooligosaccharide--protein glycosyltransferase subunit STT3A	Stt3a	P46978	0.248437	0.202163
Proteasome subunit beta type-1	Psmb1	O09061	0.00107061	0.202043
Protein SEC13 homolog	Sec13	Q9D1M0	0.111969	0.201985
Haloacid dehalogenase-like hydrolase domain-containing protein 2	Hdhd2	Q3UGR5	0.0883793	0.20184
WD repeat-containing protein 37	Wdr37	Q8CBE3	0.0686906	0.201501
U3 small nucleolar RNA-associated protein 25 homolog	Utp25	A0A0A6YWS6;A0A0R4J114;Q8BTT6	0.237862	0.201374
Propionate--CoA ligase;Acetyl-coenzyme A synthetase, cytoplasmic	Acss2	A2AQN4;Q9QXG4	0.807747	0.201108
Exosome complex component RRP41	Exosc4	Q921I9	0.0828747	0.200631
Ras-related protein Rab-1A	Rab1A	P62821	0.0174449	0.200568
Annexin A2	Anxa2	P07356	0.000534979	0.200443
Adipocyte plasma membrane-associated protein	Apmap	Q9D7N9	0.0685295	0.200113
U4/U6.U5 small nuclear ribonucleoprotein 27 kDa protein	Snrnp27	Q8K194	0.701201	0.199867
NTF2-related export protein 1	Nxt1	Q9QZV9	0.466469	0.199535
Cytoplasmic dynein 1 light intermediate chain 1	Dync1li1	Q8R1Q8	0.00409367	0.199345
Transmembrane emp24 domain-containing protein 10	Tmed10	Q9D1D4	0.0577506	0.19831
Glycolipid transfer protein	Gltp	Q9JL62	0.0445473	0.197309
Eukaryotic translation initiation factor 3 subunit K	Eif3k	Q9DBZ5	0.238737	0.197101
Tectonin beta-propeller repeat-containing protein 1	Tecpr1	Q80VP0	0.0296613	0.196874
Eukaryotic translation initiation factor 4E	Eif4e	P63073	0.0248061	0.196523
28S ribosomal protein S31, mitochondrial	Mrps31	Q61733	0.59599	0.196285
Cullin-2	Cul2	Q9D4H8	0.16814	0.196025
Nucleoporin SEH1	Seh1l	Q8R2U0	0.184215	0.195364
Lymphocyte antigen 6D	Ly6d	P35459	0.840647	0.19458
Methylosome protein 50	Wdr77	Q99J09	0.115349	0.194469
ATP-dependent RNA helicase SUPV3L1, mitochondrial	Supv3l1	Q80YD1	0.766409	0.194286
Histone-lysine N-methyltransferase SETDB1	Setdb1	D3YYC3;G5E8N3;O88974	0.252015	0.194208
Pre-mRNA-splicing factor ATP-dependent RNA helicase DHX15	Dhx15	O35286	0.0504035	0.193957
GDP-mannose 4,6 dehydratase	Gmds	Q8K0C9	0.128253	0.19392
26S proteasome non-ATPase regulatory subunit 12	Psmd12	Q3TRH2;Q9D8W5	0.0249726	0.19381
Electron transfer flavoprotein-ubiquinone oxidoreductase, mitochondrial	Etfdh	Q921G7	0.243356	0.193724
Protein THEMIS	Themis	Q8BGW0	0.0243336	0.193621
Cullin-3	Cul3	Q9JLV5	0.398168	0.193616
Short-chain dehydrogenase/reductase 3	Dhrs3	G5E8W9;O88876	0.167774	0.192729
NAD(P)H-hydrate epimerase	Naxe	Q8K4Z3	0.608672	0.192645
UPF0696 protein C11orf68 homolog	Bles03	Q8VD62	0.0211872	0.191758
Calcium-binding protein 39	Cab39	Q06138	0.29847	0.191638
MLV-related proviral Env polyprotein	NaN	P10404	0.0618724	0.191573
Sepiapterin reductase	Spr	G3UXX3;Q64105;Q91XH5	0.115945	0.191098
Phosphatidylinositol transfer protein beta isoform	Pitpnb	P53811;Q8JZZ5	0.167445	0.190424
Deoxycytidine kinase	Dck	P43346	0.00710536	0.190379
S-phase kinase-associated protein 1	Skp1	Q9WTX5	0.137599	0.190021
Serine/threonine-protein kinase D2	Prkd2	Q8BZ03	0.0913063	0.189705
Peroxiredoxin-1	Prdx1	P35700	0.0204437	0.189613
Processing of 1, ribonuclease P/MRP family, (S. cerevisiae);Processing of precursor 1, ribonuclease P/MRP family, (S. cerevisiae)	Pop1	Q8K205;Q9D4G5	0.227241	0.1895
pre-mRNA 3' end-processing protein WDR33;Wdr33 protein;pre-mRNA 3' end processing protein WDR33;Wdr33 protein	Wdr33	A0A3Q4EGD8;Q8K1G7;Q8K4P0;Q9D1P6	0.049012	0.189249
U5 small nuclear ribonucleoprotein 200 kDa helicase	Snrnp200	Q6P4T2	0.0593035	0.188669
Signal recognition particle subunit SRP68	Srp68	Q8BMA6	0.31304	0.188668
Nucleolysin TIAR	Tial1	Q921W2	0.161624	0.188631
HAUS augmin-like complex subunit 1	Haus1	A0A494BB26;Q8BHX1	0.117465	0.187992
EMAP-like protein 4;Echinoderm microtubule-associated protein-like 4;Echinoderm microtubule-associated protein-like 4	Eml4	A7ISP9;F8WJ93;Q3UMY5	0.110393	0.187618
Torsin-1A	Tor1a	Q9ER39	0.104681	0.187528
Cullin-5	Cul5	E9PV12;G3X914;Q9D5V5	0.00509078	0.187383
p21-activated protein kinase-interacting protein 1	Pak1ip1	Q9DCE5	0.900957	0.187199
Signal transducing adapter molecule 1	Stam	P70297;Q3UGN9	0.969631	0.187164
Serine/threonine-protein phosphatase 2A catalytic subunit beta isoform	Ppp2cb	P62715	0.123469	0.186698
Integrator complex subunit 6	Ints6	Q6PCM2	0.670595	0.186384
Proto-oncogene c-Rel	Rel	A4QPD3;P15307	0.0646989	0.186142
Phosphoribosyl pyrophosphate synthase-associated protein 2	Prpsap2	Q8R574	0.0668169	0.186075
Dolichyl-diphosphooligosaccharide--protein glycosyltransferase subunit 1	Rpn1	Q91YQ5	0.0260817	0.186009
Insulin-degrading enzyme	Ide	Q8CGB9;Q9JHR7	0.0555876	0.185989
Peregrin;Peregrin;Peregrin;Peregrin;Peregrin;Peregrin;Bromodomain and PHD finger containing, 1	Brpf1	A0A0N4SUS4;A0A0N4SUT9;A0A0N4SVG7;B2RRD7;E9PXP1;Q3U109;Q80XK2	0.169078	0.185892
ATP-dependent (S)-NAD(P)H-hydrate dehydratase	Naxd	J3QMM7;K3W4M4;Q9CZ42	0.143952	0.185715
Farnesyl pyrophosphate synthase	Fdps	Q920E5	0.0704705	0.185409
m7GpppX diphosphatase	Dcps	Q9DAR7	0.048059	0.18537
Septin;Septin;Septin-11	Septin11	A0A0J9YTY0;A0A0J9YUL3;Q8C1B7	0.00162503	0.185171
14-3-3 protein epsilon	Ywhae	P62259	0.0103723	0.185087
Ras GTPase-activating-like protein IQGAP1	Iqgap1	Q9JKF1	0.0161583	0.185072
Ubiquilin-1	Ubqln1	Q8R317	0.12801	0.184935
Golgi SNAP receptor complex member 2	Gosr2	A2A9I0;O35166	0.0204668	0.184716
Integrator complex subunit 1	Ints1	A0A0G2JH17;K3W4P2;Q6P4S8	0.177021	0.184711
Integrator complex subunit 2 (Fragment);Integrator complex subunit 2 (Fragment);Integrator complex subunit 2;Integrator complex subunit 2 (Fragment)	Ints2	A0A0A0MQG3;Q5SXZ7;Q80UK8;X1WI16	0.143803	0.18442
Erlin-2	Erlin2	Q8BFZ9	0.111804	0.184316
WD repeat-containing protein 43	Wdr43	A0A3Q4EHN7;Q6ZQL4	0.0643956	0.184285
Upstream-binding protein 1	Ubp1	Q811S7	0.362827	0.184186
U6 snRNA-associated Sm-like protein LSm2	Lsm2	O35900	0.11473	0.184023
Cytoplasmic aconitate hydratase	Aco1	P28271	0.0156639	0.183897
Annexin;Annexin A7	Anxa7	A0A2C9F2D2;Q07076	0.0135009	0.183828
Probable U3 small nucleolar RNA-associated protein 11	Utp11	Q9CZJ1	0.177069	0.183825
Isobutyryl-CoA dehydrogenase, mitochondrial;Isobutyryl-CoA dehydrogenase, mitochondrial;Isobutyryl-CoA dehydrogenase, mitochondrial	Acad8	A0A0R4J0P1;D3YTT4;Q9D7B6	0.802494	0.183772
Acyl-protein thioesterase 2	Lypla2	Q9WTL7	0.160218	0.183626
Actin, alpha cardiac muscle 1	Actc1	P68033	0.0201189	0.183418
Protein MEMO1	Memo1	Q91VH6	0.0177408	0.183267
Citrate synthase, mitochondrial	Cs	Q9CZU6	0.0453273	0.183173
Non-histone chromosomal protein HMG-17;Non-histone chromosomal protein HMG-17 (Fragment);Non-histone chromosomal protein HMG-17;Hmgn2 protein	Hmgn2	A3KGL9;F6W687;P09602;Q5XK38	0.205231	0.183135
Cleavage stimulation factor subunit 3	Cstf3	Q99LI7	0.253989	0.183104
Remodeling and spacing factor 1	Rsf1	E9PWW9	0.0036528	0.182928
39S ribosomal protein L28, mitochondrial	Mrpl28	Q9D1B9	0.254855	0.182495
Protein transport protein Sec31A	Sec31a	Q3UPL0	0.123233	0.182375
COP9 signalosome complex subunit 5	Cops5	O35864	0.0415104	0.182178
Serine/threonine-protein phosphatase 6 regulatory subunit 1	Ppp6r1	Q7TSI3	0.0640599	0.181787
Tetratricopeptide repeat protein 5	Ttc5	Q99LG4	0.233997	0.180807
Histone deacetylase 3	Hdac3	O88895;Q3UM33	0.121988	0.18044
N-terminal Xaa-Pro-Lys N-methyltransferase 1	Ntmt1	Q8R2U4	0.626389	0.180181
Nucleolar protein 58	Nop58	Q6DFW4	0.0495037	0.180022
Periodic tryptophan protein 2 homolog	Pwp2	Q8BU03	0.130006	0.179801
Dihydrolipoyllysine-residue acetyltransferase component of pyruvate dehydrogenase complex, mitochondrial	Dlat	Q8BMF4	0.0747426	0.179743
Dephospho-CoA kinase domain-containing protein	Dcakd	Q8BHC4	0.123365	0.179598
Isoamyl acetate-hydrolyzing esterase 1 homolog (Fragment);Isoamyl acetate-hydrolyzing esterase 1 homolog;Isoamyl acetate-hydrolyzing esterase 1 homolog	Iah1	A0A1Y7VKA0;A0A1Y7VLY5;Q9DB29	0.00596604	0.179562
Pre-mRNA-processing-splicing factor 8	Prpf8	Q99PV0	0.0301302	0.179533
Myeloid differentiation primary response protein MyD88	Myd88	P22366	0.501588	0.179456
ADP-ribose glycohydrolase ARH3	Adprs	Q8CG72	0.248691	0.179379
Dynein axonemal assembly factor 10	Dnaaf10	Q8BGF3	0.261342	0.17926
Hsp70-binding protein 1	Hspbp1	Q99P31	0.696389	0.178788
Adenylate kinase isoenzyme 6	Ak6	A0A087WRI5;Q8VCP8	0.900396	0.178701
NADH dehydrogenase [ubiquinone] 1 alpha subcomplex subunit 9, mitochondrial;NADH dehydrogenase [ubiquinone] 1 alpha subcomplex subunit 9, mitochondrial	Ndufa9	A0A0R3P9C8;Q9DC69	0.505518	0.178399
Arginine--tRNA ligase, cytoplasmic	Rars1	Q9D0I9	0.0483485	0.178388
Transcriptional adapter 1	Tada1	D6RGB8;Q99LM9	0.868172	0.177902
Glycogen phosphorylase, brain form	Pygb	Q8CI94	0.0113032	0.177871
DNA helicase;DNA helicase;Chromodomain-helicase-DNA-binding protein 4	Chd4	E9QAS4;E9QAS5;Q6PDQ2	0.070353	0.17779
1-phosphatidylinositol 4,5-bisphosphate phosphodiesterase gamma;1-phosphatidylinositol 4,5-bisphosphate phosphodiesterase gamma-1	Plcg1	A2A4A6;Q62077	0.00190013	0.177601
Ribosome biogenesis protein WDR12	Wdr12	Q9JJA4	0.189052	0.17733
28S ribosomal protein S14, mitochondrial;28S ribosomal protein S14, mitochondrial	Mrps14	D3Z2K2;Q9CR88	0.196441	0.177315
Beta-catenin-like protein 1	Ctnnbl1	Q9CWL8	0.075857	0.177194
Prelamin-A/C	Lmna	P48678	0.5647	0.177086
Adenosine kinase	Adk	P55264	0.0161403	0.176947
28S ribosomal protein S24, mitochondrial	Mrps24	Q9CQV5	0.110098	0.176821
E3 ubiquitin-protein ligase TRIM33	Trim33	E9QME5	0.102335	0.176286
Proteasome assembly chaperone 2	Psmg2	Q9EST4	0.0417898	0.176253
UPF0235 protein C15orf40 homolog	NaN	Q9CRC3	0.139232	0.17625
Proteasome activator complex subunit 2	Psme2	G3X9V0;P97372	0.0782502	0.176227
Protein kinase C;Serine/threonine-protein kinase N2	Pkn2	G3UZM9;Q8BWW9	0.673557	0.176031
Ubiquitin-conjugating enzyme E2 Z	Ube2z	Q3UE37	0.198727	0.175932
Syntaxin-binding protein 3	Stxbp3	Q60770	0.05445	0.175821
Exocyst complex component 2	Exoc2	Q9D4H1	0.516022	0.175726
MICOS complex subunit Mic10	Micos10	Q7TNS2	0.31698	0.175696
COMM domain-containing protein 1	Commd1	Q8K4M5;Q8VI86	0.219056	0.175487
26S proteasome non-ATPase regulatory subunit 8	Psmd8	Q9CPS5;Q9CX56	0.177605	0.174919
Signal transducer and activator of transcription 5B	Stat5b	P42232	0.05642	0.174878
N-terminal kinase-like protein (Fragment);N-terminal kinase-like protein;N-terminal kinase-like protein;N-terminal kinase-like protein	Scyl1	A0A494BBD3;Q9EQC5;R4H4V1;R4H4Y7	0.168635	0.174737
F-box/LRR-repeat protein 20 (Fragment);F-box/LRR-repeat protein 20 (Fragment);F-box/LRR-repeat protein 20	Fbxl20	A2A533;A2A536;Q9CZV8	0.00172542	0.174576
T-cell surface glycoprotein CD8 alpha chain	Cd8a	P01731;Q8CAX3	0.2762	0.174303
Latexin	Lxn	P70202	0.133854	0.173823
Sec24-related gene family, member C (S. cerevisiae);Sec24-related gene family, member C (S. cerevisiae)	Sec24c	A0A286YDI8;G3X972	0.0304919	0.173802
Protein disulfide-isomerase A6	Pdia6	Q922R8	0.00977085	0.173801
Elongator complex protein 1	Elp1	Q7TT37	0.45686	0.173484
Caspase-2	Casp2	P29594	0.0640578	0.173236
Ribose-phosphate diphosphokinase	Prps1l3	G3UXL2	0.0303386	0.173224
Bifunctional polynucleotide phosphatase/kinase	Pnkp	G5E8N7;Q9JLV6	0.0580021	0.173034
Mitochondrial proton/calcium exchanger protein	Letm1	Q9Z2I0	0.153506	0.172988
ENH isoform 1b;ENH isoform 1c;ENH isoform 1d;ENH isoform 1e;PDZ and LIM domain protein 5	Pdlim5	D9J2Z9;D9J300;D9J301;D9J302;Q8CI51	0.432093	0.17269
Protein unc-13 homolog D	Unc13d	B2RUP2	0.211548	0.172551
Phosphatidylinositol-binding clathrin assembly protein	Picalm	Q7M6Y3	0.630978	0.172371
Mitochondrial import inner membrane translocase subunit TIM44	Timm44	O35857	0.107076	0.17222
Platelet-activating factor acetylhydrolase IB subunit alpha2	Pafah1b2	Q61206	0.0418251	0.171961
Isocitrate dehydrogenase [NAD] subunit gamma 1, mitochondrial	Idh3g	P70404	0.335567	0.171942
Nuclear pore complex protein Nup160	Nup160	Q9Z0W3	0.297276	0.171862
L-lactate dehydrogenase B chain	Ldhb	P16125	0.0641295	0.171699
Long-chain-fatty-acid--CoA ligase 5	Acsl5	Q8JZR0	0.0032113	0.171577
60S ribosomal protein L39	Rpl39	P62892	0.160501	0.171302
ER membrane protein complex subunit 3	Emc3	Q99KI3	0.254069	0.171261
Cell division control protein 42 homolog	Cdc42	P60766	0.361696	0.171171
RBR-type E3 ubiquitin transferase;E3 ubiquitin-protein ligase ARIH1	Arih1	H9KV21;Q9Z1K5	0.0333785	0.171067
Guanine nucleotide-binding protein subunit alpha-13	Gna13	P27601	0.176541	0.171015
Ras-related protein R-Ras2	Rras2	P62071	0.0821147	0.170981
Leucine-rich PPR motif-containing protein, mitochondrial	Lrpprc	Q6PB66	0.187347	0.170804
NEDD8-activating enzyme E1 regulatory subunit	Nae1	E0CZE0;Q8VBW6	0.00246774	0.170062
COP9 signalosome complex subunit 1	Gps1	A0A140LJB7;B1ATU4;G3UXW9;Q3MIA8;Q99LD4	0.0772568	0.169954
Signal recognition particle subunit SRP72	Srp72	F8VQC1	0.0701733	0.169947
Calnexin	Canx	P35564	0.00171647	0.169676
Cell division cycle protein 23 homolog	Cdc23	A0A0R4J1W7;G3X8W7;Q8BGZ4	0.485958	0.169289
Pre-mRNA-splicing factor SYF1	Xab2	Q9DCD2	0.157396	0.169127
3'(2'),5'-bisphosphate nucleotidase 1;3'(2'),5'-bisphosphate nucleotidase 1	Bpnt1	A0A1B0GRV0;Q9Z0S1	0.12732	0.169072
Density-regulated protein	Denr	Q9CQJ6	0.0918587	0.168885
Pre-rRNA-processing protein TSR2 homolog	Tsr2	G3UWF3;H7BWY8;Q8C8T8;Z4YL87	0.668032	0.168806
SWI/SNF-related matrix-associated actin-dependent regulator of chromatin subfamily A member 5	Smarca5	Q91ZW3	0.0622835	0.168773
L-lactate dehydrogenase A chain	Ldha	P06151	0.0665592	0.168659
Coactivator-associated arginine methyltransferase 1;Histone-arginine methyltransferase CARM1	Carm1	D3YUP1;Q9WVG6	0.180143	0.168609
Cytosolic acyl coenzyme A thioester hydrolase	Acot7	E9PYH2;Q91V12	0.0155245	0.168153
Protein tyrosine phosphatase type IVA 2	Ptp4a2	O70274	0.401614	0.168021
Hippocalcin-like protein 1	Hpcal1	P62748	0.390103	0.167994
DNA polymerase epsilon catalytic subunit A	Pole	Q9WVF7	0.233353	0.167848
Mitochondrial import inner membrane translocase subunit Tim23;Mitochondrial import inner membrane translocase subunit TIM23;Mitochondrial import inner membrane translocase subunit Tim23	Timm23	A0A2I3BS49;Q9CXU4;Q9WTQ8	0.794752	0.1678
Nucleoporin 205	Nup205	A0A0J9YUD5;B9EJ54	0.0622308	0.167745
Tubulin alpha-1C chain	Tuba1c	P68373	0.00407214	0.167684
Tubulin--tyrosine ligase-like protein 12	Ttll12	Q3UDE2	0.0287078	0.167341
General transcription factor II-I repeat domain-containing protein 1 (Fragment)	Gtf2ird1	A0A0J9YV00	0.340509	0.167323
Very-long-chain 3-oxoacyl-CoA reductase	Hsd17b12	O70503	0.405444	0.167058
eIF-2-alpha kinase activator GCN1	Gcn1	E9PVA8	0.0439485	0.167021
Peptidyl-prolyl cis-trans isomerase FKBP5	Fkbp5	Q64378	0.133445	0.167002
Protein S100-A11	S100a11	P50543	0.0368324	0.166967
Cytohesin-1	Cyth1	Q3TZ02;Q9QX11	0.135591	0.166686
Charged multivesicular body protein 6 (Fragment);Charged multivesicular body protein 6	Chmp6	B1AZ42;P0C0A3	0.248581	0.166613
E3 SUMO-protein ligase PIAS1 (Fragment);E3 SUMO-protein ligase PIAS1;E3 SUMO-protein ligase PIAS1	Pias1	A0A1L1SRS2;O88907;Q3U556	0.984523	0.166598
T-cell surface glycoprotein CD8 beta chain	Cd8b	P10300	0.468867	0.166537
Elongator complex protein 2	Elp2	Q91WG4	0.69023	0.166351
Ubiquitin-conjugating enzyme E2 N	Ube2n	P61089	0.0473858	0.166216
[Pyruvate dehydrogenase (acetyl-transferring)] kinase isozyme 1, mitochondrial	Pdk1	Q8BFP9	0.940221	0.165757
Mothers against decapentaplegic homolog 3	Smad3	Q8BUN5	0.0531292	0.165272
Integrin-associated protein;Integrin-associated protein;Integrin-associated protein;Leukocyte surface antigen CD47	Cd47	A0A2R8VI30;A0A2R8VK70;A0A2R8W6P0;Q61735	0.223089	0.165229
UDP-glucose:glycoprotein glucosyltransferase 1	Uggt1	Q6P5E4	0.0725153	0.165226
Rab3 GTPase-activating protein non-catalytic subunit	Rab3gap2	A0A0A6YWM5;E9QKE4;Q8BMG7	0.0402939	0.165173
Elongation factor G, mitochondrial	Gfm1	Q8K0D5	0.108616	0.165083
GTPase NRas (Fragment);GTPase NRas (Fragment);GTPase NRas;GTPase NRas	Nras	A0A0G2JE25;A0A0G2JGP4;P08556;Q9D091	0.50167	0.165061
ADP-ribosylation factor 5	Arf5	P84084	0.92944	0.164809
Cyclin-dependent kinase 4;Cyclin-dependent kinase 4;Cyclin-dependent kinase 4 (Fragment);Cyclin-dependent kinase 4 (Fragment);Cyclin-dependent kinase 4	Cdk4	D3YWB0;D6RHS5;E9PZX7;E9Q9E4;P30285	0.310871	0.164527
Calcium load-activated calcium channel (Fragment);Calcium load-activated calcium channel	Tmco1	A0A0A6YVS2;Q921L3	0.68233	0.164454
Amine oxidase [flavin-containing] A	Maoa	Q64133	0.0119347	0.164138
Multiple epidermal growth factor-like domains protein 10 (Fragment);Multiple epidermal growth factor-like domains protein 10	Megf10	A0A140T8S0;Q6DIB5	0.122922	0.164132
Myc box-dependent-interacting protein 1;Myc box-dependent-interacting protein 1;Bin1 protein	Bin1	A0A3Q4EBK4;O08539;Q6P1B9	0.402885	0.16383
Serine/threonine-protein kinase Nek7	Nek7	Q3TN15;Q9ES74	0.031332	0.163408
NAD-dependent malic enzyme, mitochondrial	Me2	Q99KE1	0.0416447	0.163319
AP-2 complex subunit alpha-1	Ap2a1	P17426	0.0660208	0.163153
ADP-ribosylation factor 6	Arf6	P62331	0.0395771	0.162994
Notchless protein homolog 1	Nle1	Q8VEJ4	0.278015	0.162869
FAST kinase domain-containing protein 4	Tbrg4	Q91YM4	0.174809	0.162854
DNA polymerase delta subunit 2	Pold2	O35654	0.0334654	0.162847
NADPH--cytochrome P450 reductase;NADPH--hemoprotein reductase	Por	P37040;Q05DV1	0.148505	0.162843
Histone deacetylase 2	Hdac2	A0A0R4J008;P70288	0.120745	0.162679
Transformation-related protein 63-regulated-like;Tumor protein p63-regulated gene 1-like protein	Tprgl;Tprg1l	B1AX95;Q9DBS2	0.568128	0.16253
CAAT box DNA-binding protein subunit B (Fragment);Nuclear transcription factor Y subunit beta	Nfyb	D3Z723;P63139	0.165844	0.162365
Serine/threonine-protein phosphatase 2A 65 kDa regulatory subunit A beta isoform	Ppp2r1b	G3UWS4;H3BKU1;H3BLQ0;Q3TTF6;Q7TNP2	0.139479	0.162149
Serine/threonine-protein phosphatase 2A 55 kDa regulatory subunit B alpha isoform	Ppp2r2a	Q6P1F6	0.0773392	0.162106
Tryptophan--tRNA ligase, cytoplasmic	Wars1	P32921	0.0239707	0.161985
Toll-interacting protein	Tollip	Q8C5G6;Q9QZ06	0.482626	0.161866
Ras association domain-containing protein 5	Rassf5	A0A1D5RM65;Q5EBH1	0.0965621	0.161393
Gamma-adducin	Add3	A0A494B9K4;Q9QYB5	0.965869	0.161285
AP-3 complex subunit beta-1	Ap3b1	Q9Z1T1	0.891388	0.161252
Guanine nucleotide-binding protein-like 3	Gnl3	Q8CI11	0.0319652	0.161079
Tyrosine-protein phosphatase non-receptor type 7	Ptpn7	Q8BUM3	0.0197601	0.160689
Isochorismatase domain-containing protein 2A	Isoc2a	P85094	0.00627503	0.160684
Tyrosine-protein phosphatase non-receptor type 1	Ptpn1	P35821	0.0392276	0.160643
CWF19-like protein 1	Cwf19l1	Q8CI33	0.293772	0.160342
Sister chromatid cohesion protein PDS5 homolog A	Pds5a	E9QPI5;Q6A026	0.00391989	0.160068
E3 ubiquitin-protein ligase XIAP	Xiap	Q60989	0.795565	0.160037
Ubiquitin carboxyl-terminal hydrolase isozyme L3	Uchl3	Q9JKB1	0.0134072	0.160034
Peroxisomal biogenesis factor 19	Pex19	Q8VCI5	0.0740319	0.159945
Proteasome subunit beta type-9	Psmb9	P28076	0.954186	0.159817
SH2 domain-containing protein 1A	Sh2d1a	O88890	0.141803	0.159635
Ppfia1 protein	Ppfia1	B2RXQ2;B2RXW8	0.596532	0.159633
Ribose-5-phosphate isomerase	Rpia	P47968	0.0128266	0.159573
Protein RRP5 homolog	Pdcd11	Q6NS46	0.143622	0.159481
26S proteasome non-ATPase regulatory subunit 11	Psmd11	Q8BG32	0.0304903	0.15947
Very-long-chain enoyl-CoA reductase (Fragment);Very-long-chain enoyl-CoA reductase;Very-long-chain enoyl-CoA reductase;Gpsn2 protein;Very-long-chain enoyl-CoA reductase	Tecr	A0A5F8MPU6;A0A5F8MQC8;G3UWE1;Q52L67;Q9CY27	0.126016	0.159459
Nucleolus and neural progenitor protein (Fragment);Nucleolus and neural progenitor protein	Nepro	F6RAK6;Q8R2U2	0.387969	0.159312
Cytochrome c oxidase subunit NDUFA4	Ndufa4	Q62425	0.0410135	0.15907
DNA polymerase alpha catalytic subunit	Pola1	P33609	0.0311579	0.159056
ATP synthase membrane subunit K, mitochondrial	Atp5mk	Q78IK2	0.455372	0.158951
Protein tyrosine phosphatase receptor type C-associated protein (Fragment);Protein tyrosine phosphatase receptor type C-associated protein	Ptprcap	A0A494BB21;Q64697	0.554655	0.158932
Coatomer subunit delta	Arcn1	Q5XJY5	0.0428001	0.158832
Mitotic checkpoint protein BUB3	Bub3	A0A140LHA2;Q9WVA3	0.039571	0.158763
Non-SMC condensin I complex, subunit G	Ncapg	E9PWG6	0.0355628	0.15869
Ferritin heavy chain	Fth1	P09528	0.179934	0.158542
Serine/threonine-protein kinase 24	Stk24	Q99KH8	0.0813242	0.158518
Proteasome subunit beta type-2	Psmb2	Q9R1P3	0.109849	0.15843
Isochorismatase domain-containing protein 1	Isoc1	Q91V64	0.0495824	0.157881
Nucleolar protein 12	Nol12	Q8BG17	0.65266	0.157744
Tripeptidyl-peptidase 2	Tpp2	Q64514	0.0142561	0.157694
N-acetylgalactosamine kinase	Galk2	Q68FH4	0.359281	0.157692
Protein THEM6	Them6	Q80ZW2	0.020067	0.157612
GA-binding protein alpha chain	Gabpa	Q00422	0.00510914	0.157006
Male-specific lethal 3 homolog	Msl3	Q9WVG9	0.126238	0.156869
Guanylate kinase	Guk1	Q64520	0.503591	0.156553
Transmembrane emp24 domain-containing protein 9	Tmed9	Q99KF1	0.272307	0.15616
Sterol O-acyltransferase 1	Soat1	Q61263	0.0914208	0.156039
Acyl-coenzyme A thioesterase 8	Acot8	P58137;Q8BZR4	0.232351	0.155702
Peptidyl-prolyl cis-trans isomerase-like 1	Ppil1	Q9D0W5	0.0328534	0.155352
Plexin-D1	Plxnd1	Q3UH93	0.0124395	0.154671
Transducin beta-like protein 3	Tbl3	Q8C4J7	0.185752	0.154665
Protein MIS12 homolog	Mis12	Q9CY25	0.663409	0.154539
Cell division protein kinase 7;Cyclin-dependent kinase 7	Cdk7	A0A286YDC0;Q03147	0.983155	0.154422
Apoptosis regulator BAX (Fragment);Apoptosis regulator BAX;Apoptosis regulator BAX (Fragment);Apoptosis regulator BAX	Bax	A0A1B0GS13;A0A1B0GT81;A0A1B0GTA4;Q07813	0.0381054	0.154358
Protein FAM162A	Fam162a	Q9D6U8	0.126556	0.154342
U3 small nucleolar ribonucleoprotein protein IMP3	Imp3	Q921Y2	0.909556	0.154269
Guanine nucleotide-binding protein-like 3-like protein	Gnl3l	Q6PGG6	0.0285199	0.154136
Thymosin beta;Thymosin beta 15b-like	Tmsb15b1;Tmsb15l	A2AF33;Q8C0W0	0.322319	0.154034
Actin-related protein 2/3 complex subunit 3	Arpc3	Q9JM76	0.00749717	0.154021
Actin-related protein 2/3 complex subunit 1A	Arpc1a	Q9R0Q6	0.000425016	0.153915
116 kDa U5 small nuclear ribonucleoprotein component	Eftud2	A2AH85;O08810	0.0392327	0.15391
Activator of 90 kDa heat shock protein ATPase homolog 1	Ahsa1	Q8BK64	0.00404054	0.153813
Glutathione-dependent dehydroascorbate reductase;Glutathione-dependent dehydroascorbate reductase;Glutathione S-transferase omega-2;Glutathione S-transferase omega-2	Gsto2	A0A494BAY2;A0A494BB82;A0A494BBG0;Q8K2Q2	0.162285	0.153605
Cyclic AMP-dependent transcription factor ATF-2 (Fragment);Cyclic AMP-dependent transcription factor ATF-2 (Fragment);Cyclic AMP-dependent transcription factor ATF-2;Cyclic AMP-dependent transcription factor ATF-2	Atf2	A2AQE9;A2AQF0;G3UXC3;P16951	0.383884	0.153589
Nuclear envelope integral membrane protein 1	Nemp1	E9Q6Z3;Q6ZQE4	0.886277	0.153307
6-pyruvoyl tetrahydrobiopterin synthase	Pts	Q9R1Z7	0.405383	0.153294
Serine/threonine-protein phosphatase PP1-gamma catalytic subunit	Ppp1cc	P63087	0.0567314	0.153183
Annexin A11	Anxa11	P97384	0.0458218	0.15306
Rho GTPase-activating protein 15	Arhgap15	B1AW40;Q811M1	0.322956	0.153059
SEC23-interacting protein	Sec23ip	G3X928	0.0396184	0.153032
TATA box-binding protein-like 1	Tbpl1	P62340	0.787371	0.152954
Rho GTPase-activating protein 1	Arhgap1	A2AH25;Q5FWK3	0.053799	0.152908
Phosphatidylinositol 3,4,5-trisphosphate-dependent Rac exchanger 1 protein	Prex1	Q69ZK0	0.316177	0.15282
Protein flightless-1 homolog	Flii	Q9JJ28	0.109371	0.15275
Cytochrome c, somatic	Cycs	P62897	0.0586309	0.152671
Ubiquitin-conjugating enzyme E2 D3	Ube2d3	P61079	0.152053	0.152601
Proteasome assembly chaperone 3	Psmg3	Q9CZH3	0.020986	0.152536
Cytochrome c1, heme protein, mitochondrial	Cyc1	Q9D0M3	0.00399292	0.15244
WD repeat-containing protein 18	Wdr18	Q4VBE8	0.946518	0.152048
Phosphoprotein associated with glycosphingolipid-enriched microdomains 1	Pag1	Q3U1F9	0.3252	0.151901
Leupaxin	Lpxn	Q99N69	0.588566	0.15188
F-box/LRR-repeat protein 8	Fbxl8	Q8CIG9	0.27968	0.151743
Nuclease EXOG, mitochondrial	Exog	Q8C163	0.059221	0.151676
Protein phosphatase 1 regulatory subunit 21	Ppp1r21	Q3TDD9	0.662858	0.151475
Exosome complex component RRP45	Exosc9	Q9JHI7	0.0350893	0.151278
Peroxisomal carnitine O-octanoyltransferase	Crot	Q9DC50	0.0266293	0.15125
Signal transducer and activator of transcription;Signal transducer and activator of transcription 3	Stat3	B7ZC18;P42227	0.3578	0.151127
Exocyst complex component 1	Exoc1	Q5PPR2;Q6P1Y9;Q8R3S6	0.804586	0.150829
PTS1-BP;Peroxisomal targeting signal 1 receptor	Pex5	D3Z600;O09012	0.403968	0.15064
Putative hydrolase RBBP9	Rbbp9	O88851	0.239336	0.150615
Ras-related protein Rab-21	Rab21	P35282	0.0698972	0.150409
Keratin, type II cytoskeletal 2 oral	Krt76	Q3UV17	0.737288	0.150164
Glutamine amidotransferase-like class 1 domain-containing protein 1	Gatd1	Q8BFQ8	0.110801	0.150111
Threonine--tRNA ligase 1, cytoplasmic	Tars1	Q9D0R2	0.0396106	0.150072
Probable tRNA N6-adenosine threonylcarbamoyltransferase	Osgep	A0A0R4J1Y3;Q8BWU5	0.0633731	0.149961
Dr1-associated corepressor	Drap1	D3YY09;D3YYC2;F6T9K1;G3UXH5;Q9D6N5	0.181108	0.149933
Myosin regulatory light chain 12B;Myosin, light chain 12A, regulatory, non-sarcomeric	Myl12b;Myl12a	Q3THE2;Q6ZWQ9	0.0796684	0.149902
Tyrosine-protein kinase;Proto-oncogene tyrosine-protein kinase LCK	Lck	E9Q696;P06240	0.111868	0.149592
Exosome RNA helicase MTR4	Mtrex	Q9CZU3	0.00116207	0.149549
Tyrosine-protein kinase CSK	Csk	P41241	0.0387779	0.149449
DNA-directed RNA polymerases I, II, and III subunit RPABC3 (Fragment);DNA-directed RNA polymerases I, II, and III subunit RPABC3;DNA-directed RNA polymerases I, II, and III subunit RPABC3	Polr2h	A0A338P6B4;A0A338P6I2;Q923G2	0.317061	0.148876
Tubulin epsilon chain	Tube1	Q9D6T1	0.43117	0.148841
RuvB-like 2	Ruvbl2	Q9WTM5	0.0279878	0.148828
Poly(U)-binding-splicing factor PUF60	Puf60	Q3UEB3	0.00357489	0.148654
Signal transducer and activator of transcription 5A	Stat5a	P42230	0.0746845	0.148642
RNA helicase;Probable ATP-dependent RNA helicase DDX41	Ddx41	A0A1S6GWJ4;Q91VN6	0.146277	0.148368
Glycine--tRNA ligase	Gars1	Q9CZD3	0.162806	0.148217
SWI/SNF-related matrix-associated actin-dependent regulator of chromatin subfamily B member 1	Smarcb1	Q9Z0H3	0.0832705	0.147958
Metastasis-associated protein MTA1	Mta1	F8WHY8	0.212587	0.14781
Isocitrate dehydrogenase [NAD] subunit, mitochondrial	Idh3b	Q91VA7	0.585369	0.147595
Coatomer subunit beta'	Copb2	O55029	0.0248473	0.147562
SH3 domain-binding glutamic acid-rich-like protein	Sh3bgrl	Q9JJU8	0.283186	0.147477
Four and a half LIM domains protein 3	Fhl3	F2Z455;Q9R059	0.651173	0.147438
TBC1 domain family member 15	Tbc1d15	Q9CXF4	0.0183206	0.147434
Reactive oxygen species modulator 1	Romo1	P60603	0.559007	0.147424
Calpain-1 catalytic subunit	Capn1	O35350	0.295208	0.147418
DnaJ homolog subfamily C member 24	Dnajc24	Q91ZF0	0.483761	0.147359
DNA primase large subunit	Prim2	P33610	0.109614	0.147253
ATPase family, AAA domain-containing 2B	Atad2b	E9Q166	0.854829	0.14707
Transportin-1	Tnpo1	Q8BFY9	0.0317633	0.146893
Protein argonaute-1;Protein argonaute-1 (Fragment);Protein argonaute-1	Ago1	A0A6I8MX18;H3BJ70;Q8CJG1	0.111004	0.14685
Ketosamine-3-kinase	Fn3krp	Q8K274	0.680696	0.14674
Methionine--tRNA ligase, cytoplasmic;Methionine--tRNA ligase, cytoplasmic	Mars1	E9QB02;Q68FL6	0.0104651	0.146692
Glycylpeptide N-tetradecanoyltransferase 1	Nmt1	O70310	0.168026	0.146676
Dipeptidyl peptidase 3	Dpp3	Q99KK7	0.0193255	0.14662
28S ribosomal protein S9, mitochondrial	Mrps9	Q9D7N3	0.466209	0.14653
Ribosomal protein S6 kinase alpha-3	Rps6ka3	P18654	0.142855	0.146062
Ras-related protein Rab-1B	Rab1b	Q9D1G1	0.0042379	0.146007
Gem-associated protein 5	Gemin5	A2AFQ9;E9PUU4;Q8BX17	0.00947832	0.145889
Serine/arginine-rich-splicing factor 7	Srsf7	A0A3Q4EH04;A0A3Q4L335;A0A3Q4L393	0.057672	0.145636
Long-chain-fatty-acid--CoA ligase 3;Fatty acid CoA ligase Acsl3	Acsl3	E9PUC2;Q9CZW4	0.189209	0.145419
Aldehyde dehydrogenase, mitochondrial	Aldh2	P47738	0.24171	0.145376
Probable 18S rRNA (guanine-N(7))-methyltransferase	Bud23	Q9CY21	0.289206	0.145275
28S ribosomal protein S29, mitochondrial;28S ribosomal protein S29, mitochondrial;28S ribosomal protein S29, mitochondrial	Dap3	A0A0R4J1B9;G3X9M0;Q9ER88	0.300653	0.14519
2-hydroxyacyl-CoA lyase 2	Ilvbl	Q8BU33	0.187072	0.144467
Receptor-type tyrosine-protein phosphatase C;Protein-tyrosine-phosphatase	Ptprc	P06800;S4R1M0	0.0125228	0.14445
Leucine-rich repeat and calponin homology domain-containing protein 1	Lrch1	A0A2I3BQ16;P62046	0.214418	0.144205
RNA-binding protein NOB1	Nob1	E9PW56;Q8BW10	0.159652	0.144137
Nuclear receptor coactivator;Nuclear receptor coactivator 2	Ncoa2	E9PV80;Q61026	0.665516	0.14405
GATOR complex protein MIOS	Mios	Q8VE19	0.228163	0.144017
Anaphase-promoting complex subunit 2	Anapc2	Q8BZQ7	0.852741	0.143778
MICOS complex subunit Mic26	Apoo	Q9DCZ4	0.441158	0.143634
Serine/threonine-protein kinase 4	Stk4	Q9JI11	0.0437842	0.143495
AP-1 complex subunit gamma-1;AP-1 complex subunit gamma	Ap1g1	P22892;Q8CBB7	0.19024	0.14344
Phosphoacetylglucosamine mutase	Pgm3	Q8BWW3;Q9CYR6	0.606704	0.143354
mRNA (2'-O-methyladenosine-N(6)-)-methyltransferase	Pcif1	P59114	0.872094	0.143332
Methionine adenosyltransferase 2 subunit beta	Mat2b	Q99LB6	0.0704051	0.14319
U4/U6.U5 tri-snRNP-associated protein 2	Usp39	Q3TIX9	0.211479	0.143099
DNA repair protein complementing XP-C cells homolog	Xpc	P51612	0.0630511	0.143095
Mitogen-activated protein kinase 1	Mapk1	P63085	0.0532228	0.142719
Polyribonucleotide nucleotidyltransferase 1, mitochondrial	Pnpt1	Q8K1R3	0.0445058	0.142605
MYG1 exonuclease	Myg1	Q9JK81	0.00266096	0.142048
DNA mismatch repair protein Msh2	Msh2	P43247	0.0434241	0.141905
Calcineurin B homologous protein 1	Chp1	B0R091;P61022	0.230898	0.141844
Proteasome subunit alpha type-4	Psma4	Q9R1P0	0.0371997	0.141665
Elongation factor 1-gamma	Eef1g	Q9D8N0	0.0229739	0.141656
Eukaryotic peptide chain release factor subunit 1	Etf1	Q8BWY3	0.108333	0.141436
Guanine nucleotide-binding protein G(I)/G(S)/G(T) subunit beta-2	Gnb2	P62880	0.0273452	0.141289
Replication protein A 70 kDa DNA-binding subunit	Rpa1	Q8VEE4	0.0815154	0.141051
Short-chain specific acyl-CoA dehydrogenase, mitochondrial	Acads	Q07417	0.0624316	0.1402
Nebulin;Nebulin;Nebulin;Nebulin;Nebulin;Nebulin (Fragment)	Neb	A0A571BF46;A0A571BF58;A2AQA9;A2AQB2;E9Q1W3;G3UWS1	0.140867	0.140099
Integrator complex subunit 9	Ints9	A0A0R4J0J5;Q8K114	0.126713	0.140052
Neutral alpha-glucosidase AB	Ganab	Q8BHN3	0.132915	0.139977
Kinase	Itpkb	B2RXC2	0.726997	0.139957
Reticulon-4	Rtn4	Q99P72	0.220331	0.139381
U8 snoRNA-decapping enzyme (Fragment);U8 snoRNA-decapping enzyme	Nudt16	A0A087WRE5;Q6P3D0	0.0380857	0.139276
Syntenin-1	Sdcbp	O08992;Q3TMX0	0.0142684	0.138945
Coatomer subunit alpha	Copa	Q8CIE6	0.0120758	0.138828
Receptor-type tyrosine-protein phosphatase F	Ptprf	A2A8L5	0.0611679	0.138792
26S proteasome non-ATPase regulatory subunit 6	Psmd6	Q99JI4	0.807075	0.13866
General transcription factor IIH subunit;General transcription factor IIH subunit 2;General transcription factor IIH subunit 2	Gtf2h2	Q91YN8;Q9JIB4;S4R2R0	0.741221	0.138651
Ubiquitin carboxyl-terminal hydrolase;Ubiquitin carboxyl-terminal hydrolase 4	Usp4	A0A0A6YW28;P35123	0.00152585	0.138404
Aurora kinase B	Aurkb	O70126	0.280505	0.138376
Cerebral cavernous malformations protein 2 homolog	Ccm2	Q8K2Y9	0.0483678	0.1383
Nuclear transcription factor Y subunit gamma	Nfyc	P70353	0.0671741	0.138184
POC1 centriolar protein homolog A	Poc1a	Q8JZX3	0.176347	0.138027
Serine/threonine-protein phosphatase 6 regulatory subunit 3	Ppp6r3	G5E8R4;Q922D4	0.0314888	0.137909
Vinculin	Vcl	Q64727	0.0470768	0.137385
Dehydrogenase/reductase SDR family member 1	Dhrs1	Q99L04	0.447583	0.137281
D-dopachrome decarboxylase	Ddt	O35215	0.127391	0.137101
Probable ATP-dependent RNA helicase DDX31	Ddx31	Q6NZQ2	0.0606395	0.137068
Mitochondrial carrier homolog 2	Mtch2	A2AFW6;Q791V5;Q9D050	0.929655	0.136757
Small nuclear ribonucleoprotein G	Snrpg	P62309	0.161172	0.136742
Predicted readthrough transcript (NMD candidate), 44505;E3 ubiquitin-protein ligase ZFP91	Gm44505;Zfp91	E0CY81;Q62511	0.45335	0.136577
Phosphoribosyl pyrophosphate synthase-associated protein 1	Prpsap1	B1AT82	0.0157614	0.136299
Actin-related protein 3	Actr3	Q99JY9	0.00358539	0.136143
Sphingosine-1-phosphate lyase 1	Sgpl1	D6REF7;Q8R0X7	0.363332	0.136127
DENN domain-containing protein 4C	Dennd4c	A6H8H2;E9Q449	0.19825	0.136014
SHC SH2 domain-binding protein 1 (Fragment);SHC SH2 domain-binding protein 1	Shcbp1	A0A140LHK7;Q9Z179	0.80719	0.135785
Serine palmitoyltransferase 2	Sptlc2	P97363	0.376198	0.135655
Dynamin-1-like protein	Dnm1l	E9PUD2	0.00458783	0.135616
RRP12-like protein	Rrp12	Q6P5B0	0.214061	0.135293
Stromal interaction molecule 1	Stim1	P70302	0.326956	0.135246
DnaJ heat shock protein family (Hsp40) member C13	Dnajc13	D4AFX7;G3X922	0.210531	0.135212
HECT-type E3 ubiquitin transferase;E3 ubiquitin-protein ligase;E3 ubiquitin-protein ligase;HECT-type E3 ubiquitin transferase	Nedd4l	A0A494B953;A0A494B9F0;A0A494BA39;A0A494BAG2	0.353958	0.135137
Protein N-terminal asparagine amidohydrolase	Ntan1	Q64311	0.143052	0.134949
Cyclin-dependent kinase 1	Cdk1	P11440	0.188833	0.134945
Protein NipSnap homolog 1	Nipsnap1	O55125	0.142804	0.134718
Aldo-keto reductase family 1 member B1	Akr1b1	P45376	0.069728	0.134366
Interleukin enhancer-binding factor 3	Ilf3	A0A1L1STE4	0.324812	0.134046
Gamma-taxilin	Txlng	Q8BHN1	0.483791	0.134045
Zinc finger RNA-binding protein	Zfr	O88532	0.370774	0.133528
RNA helicase (Fragment);Probable ATP-dependent RNA helicase DDX47	Ddx47	A0A0N4SVT1;Q9CWX9	0.179283	0.133488
Ubiquitin carboxyl-terminal hydrolase 47	Usp47	A0A1L1SV73;Q8BY87	0.194648	0.133299
Lysine--tRNA ligase	Kars1	Q99MN1	0.0120523	0.133039
Heat shock protein 75 kDa, mitochondrial	Trap1	Q9CQN1	0.121242	0.132908
Serine-threonine kinase receptor-associated protein	Strap	Q9Z1Z2	0.0340556	0.132553
Coiled-coil domain-containing protein 127;Coiled-coil domain-containing protein 127 (Fragment);Coiled-coil domain-containing protein 127	Ccdc127	E0CYP1;E0CYX9;Q3TC33	0.156877	0.132468
Aspartate--tRNA ligase, cytoplasmic	Dars1	Q922B2	0.0183531	0.13241
Eukaryotic translation initiation factor 5B	Eif5b	Q05D44	0.124776	0.132324
Ornithine aminotransferase, mitochondrial	Oat	P29758	0.0314467	0.132189
Actin-related protein 2/3 complex subunit 4	Arpc4	P59999	0.0931908	0.132041
Glutathione S-transferase omega-1	Gsto1	O09131	0.33896	0.131955
Spliceosome RNA helicase Ddx39b	Ddx39b	Q9Z1N5	0.00677056	0.131704
Phospholipase A-2-activating protein	Plaa	P27612	0.0265359	0.131673
Acetyl-CoA acetyltransferase, cytosolic	Acat2	Q8CAY6	0.0715637	0.131644
Ubiquitin recognition factor in ER-associated degradation protein 1	Ufd1	P70362	0.016653	0.131236
DNA replication licensing factor MCM7	Mcm7	Q61881	0.063376	0.131217
Transcription factor Sp1	Sp1	G3X8Q0;O89090	0.960283	0.13115
Tyrosine-protein phosphatase non-receptor type 6	Ptpn6	P29351	0.0362253	0.131066
FYVE, RhoGEF and PH domain-containing protein 3;FYVE, RhoGEF and PH domain-containing protein 3	Fgd3	O88842;Q3TNB8	0.708888	0.131022
Nicotinamide/nicotinic acid mononucleotide adenylyltransferase 1	Nmnat1	Q9EPA7	0.908506	0.130772
FACT complex subunit;FACT complex subunit SPT16	Supt16;Supt16h	G3X956;Q920B9	0.0658578	0.130716
Lysosomal acid phosphatase;Lysosomal acid phosphatase (Fragment);Lysosomal acid phosphatase	Acp2	A0A5F8MPS7;B7ZCF4;P24638	0.179473	0.13068
Serine palmitoyltransferase 1	Sptlc1	O35704	0.520519	0.130555
Calcineurin subunit B type 1	Ppp3r1	Q63810	0.514991	0.130377
Protein HGH1 homolog	Hgh1	Q8C3I8	0.205834	0.130227
39S ribosomal protein L20, mitochondrial;39S ribosomal protein L20, mitochondrial	Mrpl20	Q9CQL4;V9GXI7	0.235663	0.13015
NADH dehydrogenase [ubiquinone] 1 subunit C2	Ndufc2	Q9CQ54	0.0719545	0.130113
ZW10 interactor	Zwint	Q9CQU5	0.80981	0.129955
Cytoplasmic dynein 1 heavy chain 1	Dync1h1	Q9JHU4	0.0736155	0.129598
Dual specificity mitogen-activated protein kinase kinase 7	Map2k7	Q8CE90	0.317873	0.129461
Iron-sulfur clusters transporter ABCB7, mitochondrial	Abcb7	Q61102	0.145254	0.129453
Splicing factor 3B subunit 1	Sf3b1	G5E866;Q99NB9	0.186055	0.129444
Torsin-1A-interacting protein 1	Tor1aip1	Q921T2	0.259418	0.129298
E3 ubiquitin-protein ligase UBR4	Ubr4	A2AN08	0.0375746	0.129231
Peroxisomal multifunctional enzyme type 2	Hsd17b4	P51660	0.0523894	0.128887
Eukaryotic translation initiation factor 3 subunit C	Eif3c	Q8R1B4	0.00916867	0.128829
Transcriptional regulator ATRX	Atrx	Q61687	0.0276472	0.128805
Bifunctional glutamate/proline--tRNA ligase	Eprs1	Q8CGC7	0.114455	0.128793
1,2-dihydroxy-3-keto-5-methylthiopentene dioxygenase	Adi1	Q99JT9	0.155763	0.128698
UDP-N-acetylglucosamine--peptide N-acetylglucosaminyltransferase 110 kDa subunit	Ogt	Q8CGY8	0.0106573	0.128268
Twinfilin-2	Twf2	Q9Z0P5	0.0138244	0.127777
Inositol polyphosphate 5-phosphatase K (Fragment);Inositol polyphosphate 5-phosphatase K	Inpp5k	Q5ND44;Q8C5L6	0.737486	0.127757
U3 small nucleolar RNA-interacting protein 2	Rrp9	Q91WM3	0.35648	0.127688
Basic leucine zipper and W2 domain-containing protein 2	Bzw2	Q91VK1	0.0466622	0.1276
Signal recognition particle 54 kDa protein	Srp54	P14576	0.190669	0.12759
Vesicle-trafficking protein SEC22b	Sec22b	O08547	0.347982	0.127507
26S proteasome non-ATPase regulatory subunit 7	Psmd7	P26516	0.0910099	0.127306
Serine/threonine-protein phosphatase (Fragment);Serine/threonine-protein phosphatase 5	Ppp5c	F7BX26;Q60676	0.143419	0.127153
Probable dimethyladenosine transferase	Dimt1	Q9D0D4	0.334058	0.126992
[Protein ADP-ribosylarginine] hydrolase	Adprh	P54923	0.550185	0.126928
rRNA 2'-O-methyltransferase fibrillarin	Fbl	P35550	0.132202	0.126883
Protein angel homolog 2	Angel2	Q8K1C0	0.554862	0.12676
ATP synthase subunit alpha, mitochondrial	Atp5f1a	Q03265	0.0325201	0.126574
Non-specific protein-tyrosine kinase	Ptk2b	E9Q2A6	0.291507	0.12633
ADP/ATP translocase 2	Slc25a5	P51881	0.028601	0.126302
Enoyl-CoA delta isomerase 3, peroxisomal (Fragment);Enoyl-CoA delta isomerase 3, peroxisomal	Eci3	E9PY42;Q78JN3	0.880595	0.126288
Hepatoma-derived growth factor-related protein 2	Hdgfl2	Q3UMU9	0.0296173	0.126243
Guanine nucleotide-binding protein G(i) subunit alpha-3	Gnai3	Q9DC51	0.7443	0.126235
Syntaxin-6	Stx6	A0A0A6YXG0;Q9JKK1	0.640179	0.126217
Selenide, water dikinase 2	Sephs2	P97364	0.790786	0.12617
WD repeat-containing protein 76	Wdr76	A6PWY4	0.155596	0.126016
Moesin	Msn	P26041	0.0528937	0.126006
Nesprin-1	Syne1	A0A1L1STC6;Q6ZWR6	0.385298	0.125699
Syntaxin-4	Stx4	P70452	0.823088	0.125686
Transcription factor p65	Rela	A0A494BA44;Q04207	0.336906	0.125553
Protein phosphatase 1 regulatory subunit 7	Ppp1r7	Q3UM45	0.0470976	0.125511
Cullin-1	Cul1	Q9WTX6	0.272798	0.125209
Hemogen	Hemgn	Q9ERZ0	0.421543	0.125081
Nipped-B-like protein	Nipbl	Q6KCD5	0.107732	0.124971
Histone acetyltransferase KAT7	Kat7	Q5SVQ0	0.0993702	0.124931
PAN2-PAN3 deadenylation complex subunit Pan3 (Fragment);PAN2-PAN3 deadenylation complex subunit PAN3;PAN2-PAN3 deadenylation complex subunit Pan3 (Fragment);PAN2-PAN3 deadenylation complex subunit Pan3	Pan3	H3BJH6;H3BKF3;H3BLB9;Q640Q5	0.0183961	0.124755
ER membrane protein complex subunit 2	Emc2	Q9CRD2	0.746096	0.124583
Coagulation factor XIII A chain	F13a1	Q8BH61	0.073916	0.124526
WD repeat-containing protein 81 (Fragment);WD repeat-containing protein 81	Wdr81	K4DI77;Q5ND34	0.620222	0.124388
Protein PET117 homolog, mitochondrial	Pet117	P0DJF2	0.260914	0.124365
Oxysterol-binding protein;Oxysterol-binding protein-related protein 8	Osbpl8	A0A0R4J150;B9EJ86	0.592177	0.124361
Inositol monophosphatase 1;Inositol-1-monophosphatase	Impa1	O55023;Q924B0	0.130599	0.124281
Mitochondrial import receptor subunit TOM22 homolog	Tomm22	Q9CPQ3	0.663192	0.124158
SWI/SNF-related matrix-associated actin-dependent regulator of chromatin subfamily D member 1	Smarcd1	A0A2R8VKP3;Q61466	0.00351829	0.124021
Inorganic pyrophosphatase	Ppa1	Q9D819	0.196179	0.123489
RAF proto-oncogene serine/threonine-protein kinase	Raf1	Q99N57	0.310887	0.123223
DNA polymerase alpha subunit B	Pola2	P33611	0.0987	0.123217
Cysteine-rich protein 1	Crip1	A0A0G2JEK2;P63254	0.0489904	0.123055
Thimet oligopeptidase	Thop1	A0A0R4IZY0;Q8C1A5	0.550578	0.12287
Basigin (Fragment);Basigin;Basigin	Bsg	J3QP71;K3W4Q8;P18572	0.325934	0.12257
Eukaryotic translation initiation factor 2 subunit 3, X-linked	Eif2s3x	Q9Z0N1	0.0610857	0.122558
Lon protease homolog, mitochondrial	Lonp1	Q8CGK3	0.183551	0.122475
Histone-binding protein RBBP4	Rbbp4	Q60972	0.10152	0.122284
Coatomer subunit gamma-1	Copg1	Q9QZE5	0.017647	0.12224
GMP reductase 2	Gmpr2	Q99L27	0.0344589	0.122237
DNA replication complex GINS protein PSF1	Gins1	Q9CZ15	0.113962	0.121893
DNA replication complex GINS protein SLD5	Gins4	Q99LZ3	0.866924	0.12152
Ankyrin repeat and KH domain-containing 1	Ankhd1	E9PUR0;E9Q1M6	0.0245657	0.121463
Ubiquitin thioesterase OTUB1	Otub1	Q7TQI3	0.0490231	0.12127
Nuclear pore complex protein Nup85	Nup85	Q8R480	0.0102877	0.120862
mRNA cap guanine-N7 methyltransferase	Rnmt	Q9D0L8	0.72249	0.120815
RWD domain-containing protein 1	Rwdd1	Q9CQK7	0.788514	0.12065
Plastin-2	Lcp1	Q61233	0.0962548	0.120511
Growth factor receptor-bound protein 2	Grb2	B1AT92;Q60631	0.018212	0.120244
Adenylosuccinate synthetase isozyme 2	Adss2	P46664	0.00874554	0.120149
V-type proton ATPase catalytic subunit A	Atp6v1a	P50516	0.0324707	0.120133
DNA-(apurinic or apyrimidinic site) endonuclease	Apex1	P28352	0.944671	0.120054
U6 snRNA-associated Sm-like protein LSm8	Lsm8	Q6ZWM4	0.155286	0.120033
Formin-like protein 1	Fmnl1	A0A1W2P6X3;Q9JL26	0.0991689	0.119865
Nuclear pore membrane glycoprotein 210	Nup210	Q9QY81	0.335453	0.119857
Actin-related protein 2/3 complex subunit;Actin-related protein 2/3 complex subunit 1B	Arpc1b	Q91Z25;Q9WV32	0.162653	0.119604
STAM-binding protein	Stambp	Q9CQ26	0.0164197	0.11951
V(D)J recombination-activating protein 2	Rag2	P21784	0.0818117	0.119311
39S ribosomal protein L45, mitochondrial	Mrpl45	Q9D0Q7	0.819136	0.119303
Cytochrome c oxidase subunit 5B, mitochondrial;Cytochrome c oxidase polypeptide Vb	Cox5b;Cox5b-ps	P19536;Q9D881	0.0468378	0.11926
Voltage-dependent anion-selective channel protein 3	Vdac3	Q60931	0.0187998	0.119093
Nuclear pore complex protein Nup54	Nup54	Q8BTS4	0.0667925	0.118923
5'-nucleotidase domain-containing 2	Nt5dc2	A0A2I3BR81	0.976872	0.118855
Protein FAM3C (Fragment);Protein FAM3C;Protein FAM3C;Protein FAM3C	Fam3c	E9Q6F0;G3X9I1;G5E911;Q91VU0	0.184384	0.118825
Polyglutamine-binding protein 1	Pqbp1	Q91VJ5	0.347734	0.11877
Cyclin-dependent kinase 2	Cdk2	P97377	0.196674	0.11858
DEAH box protein 9	Dhx9	E9QNN1	0.0454756	0.11855
Eukaryotic translation initiation factor 2 subunit 3, Y-linked	Eif2s3y	Q9Z0N2	0.193981	0.118468
Tubulin-specific chaperone E	Tbce	E0CZ81;Q8CIV8	0.599364	0.11844
Neuropilin-1	Nrp1	P97333	0.177266	0.11831
Inosine-5'-monophosphate dehydrogenase 2	Impdh2	P24547	0.0218893	0.118256
Malectin	Mlec	Q6ZQI3	0.388346	0.11814
Leukotriene A-4 hydrolase	Lta4h	P24527	0.0957629	0.118006
3-phosphoinositide-dependent protein kinase 1	Pdpk1	F2Z3X6;Q3TRL2;Q9Z2A0	0.902083	0.117964
Paired amphipathic helix protein Sin3a	Sin3a	Q60520	0.205743	0.11791
DDB1- and CUL4-associated factor 8	Dcaf8	Q8N7N5	0.224231	0.117814
Eukaryotic translation initiation factor 2A	Eif2a	Q8BJW6	0.0644977	0.117801
GTP-binding protein SAR1a	Sar1a	P36536;Q99JZ4	0.0742292	0.117497
Extended synaptotagmin-1	Esyt1	Q3U7R1	0.253879	0.117442
UV excision repair protein RAD23 homolog B	Rad23b	P54728	0.0390236	0.117399
Coatomer subunit beta	Copb1	Q9JIF7	0.0117503	0.117208
Carboxypeptidase;Lysosomal protective protein	Ctsa	G3X8T3;P16675	0.542462	0.116763
Ataxin-10	Atxn10	P28658	0.303749	0.116315
Aftiphilin	Aftph	Q80WT5	0.152482	0.116228
PITH domain-containing protein 1	Pithd1	Q8BWR2	0.949225	0.116108
Signal recognition particle receptor subunit alpha	Srpra	Q9DBG7	0.0887366	0.115434
Translation initiation factor eIF-2B subunit delta	Eif2b4	D3Z780;Q61749	0.137208	0.114789
LRP chaperone MESD	Mesd	Q9ERE7	0.041414	0.114742
UDP-glucose 4-epimerase	Gale	Q8R059	0.0598127	0.114723
Glutathione synthetase	Gss	P51855	0.884479	0.114451
Polypyrimidine tract-binding protein 3	Ptbp3	G3UXA6;G8JL74;Q8BHD7	0.138077	0.114161
Histone-lysine N-methyltransferase EHMT1	Ehmt1	A0A0H2UH19;Q5DW34;Z4YJZ7	0.442613	0.114022
Serine/threonine-protein kinase PAK 2	Pak2	Q8CIN4	0.122961	0.113799
Splicing factor 3A subunit 3	Sf3a3	Q9D554	0.0388462	0.113546
Galactokinase	Galk1	Q9R0N0	0.120792	0.113518
Histidine--tRNA ligase, cytoplasmic	Hars1	Q61035	0.0853969	0.113394
Tapasin-related protein	Tapbpl	Q8VD31	0.525177	0.113357
Cohesin subunit SA-1	Stag1	F8WHU7;Q9D3E6	0.0575509	0.113327
Acylglycerol kinase, mitochondrial	Agk	Q9ESW4	0.798463	0.113271
WW domain-binding protein 4	Wbp4	Q61048	0.562118	0.113186
GDP-L-fucose synthase	Gfus	P23591	0.0215813	0.113105
Valacyclovir hydrolase	Bphl	Q8R164	0.0151537	0.113093
GTPase IMAP family member 1	Gimap1	P70224;Q3TFI6	0.707763	0.113092
Puromycin-sensitive aminopeptidase	Npepps	Q11011	0.0168369	0.11307
TIP41-like protein	Tiprl	Q8BH58	0.872859	0.113012
26S proteasome complex subunit SEM1	Sem1	P60897	0.488166	0.112907
Calmodulin-1;Calmodulin-2;Calmodulin-3	Calm1;Calm2;Calm3	P0DP26;P0DP27;P0DP28	0.0172535	0.112905
Mitochondrial import receptor subunit TOM5 homolog	Tomm5	B1AXP6	0.678608	0.112593
Voltage-dependent L-type calcium channel subunit alpha;Voltage-dependent L-type calcium channel subunit alpha;Voltage-dependent L-type calcium channel subunit alpha;Voltage-dependent L-type calcium channel subunit alpha-1D	Cacna1d	A0A286YD72;A0A2C9F2E5;A0A589Q4M7;Q99246	0.1433	0.112068
DNA replication licensing factor MCM6	Mcm6	P97311;Q3ULG5	0.0157544	0.111774
cAMP-dependent protein kinase type II-beta regulatory subunit	Prkar2b	P31324	0.465537	0.1113
Phenylalanine--tRNA ligase beta subunit	Farsb	Q9WUA2	0.00818542	0.111272
Peroxiredoxin-2	Prdx2	Q61171	0.101188	0.111133
Eukaryotic translation initiation factor 3 subunit H	Eif3h	Q91WK2	0.244251	0.110917
Palmitoyltransferase ZDHHC20	Zdhhc20	Q5Y5T1	0.817903	0.110871
Eukaryotic translation initiation factor 2 subunit 1	Eif2s1	Q6ZWX6	0.022535	0.11043
Small nuclear ribonucleoprotein Sm D1	Snrpd1	P62315	0.118279	0.110363
Thioredoxin reductase 1, cytoplasmic	Txnrd1	Q9JMH6	0.00283096	0.110162
Sin3 histone deacetylase corepressor complex component SDS3	Suds3	A0A0R4J243;Q8BR65	0.374388	0.11005
AFG3-like protein 1	Afg3l1	Q920A7	0.814508	0.109994
Phosphatidylinositol 3,4,5-trisphosphate 5-phosphatase 1	Inpp5d	Q9ES52	0.21214	0.10962
Selenocysteine-specific elongation factor	Eefsec	Q9JHW4	0.0982305	0.109581
Protein strawberry notch homolog 1;Protein strawberry notch homolog 1 (Fragment);Protein strawberry notch homolog 1	Sbno1	B2RRI2;F7CVW0;Q689Z5	0.0180974	0.109473
Heat shock 70 kDa protein 4	Hspa4	Q3U2G2	0.0735543	0.109296
Cysteine and histidine-rich domain-containing protein 1	Chordc1	Q9D1P4	0.14107	0.109229
Ribosome-recycling factor, mitochondrial	Mrrf	Q9D6S7	0.855316	0.109094
7SK snRNA methylphosphate capping enzyme	Mepce	Q8K3A9	0.391548	0.108954
DnaJ homolog subfamily B member 11	Dnajb11	Q99KV1	0.00576654	0.108377
RalBP1-associated Eps domain-containing protein 1;RalBP1-associated Eps domain-containing protein 1;RalBP1-associated Eps domain-containing protein 1 (Fragment);RalBP1-associated Eps domain-containing protein 1	Reps1	D3Z2E3;E9Q632;F6R6F1;O54916	0.236821	0.108125
Transforming protein RhoA	Rhoa	Q9QUI0	0.0965587	0.108038
Elongin-B	Elob	P62869	0.0447478	0.107926
Actin-related protein 2	Actr2	P61161	0.060942	0.107844
Phosphofurin acidic cluster sorting protein 1	Pacs1	Q8K212	0.316916	0.107621
Cathepsin D	Ctsd	P18242	0.281097	0.107437
Inactive ubiquitin thioesterase OTULINL	Otulinl	A0A2I3BPS6;Q3TVP5	0.167975	0.107247
Sorcin	Sri	Q6P069	0.203755	0.107093
Histone deacetylase 1	Hdac1	O09106	0.054687	0.106946
Coiled-coil-helix-coiled-coil-helix domain-containing protein 2	Chchd2	Q9D1L0	0.839339	0.106926
DNA topoisomerase 2-beta	Top2b	Q64511	0.162655	0.106881
Thymosin beta-4	Tmsb4x	P20065	0.0134007	0.10682
Presequence protease, mitochondrial	Pitrm1	Q8K411	0.00630021	0.106763
Protein RCC2 (Fragment)	Rcc2	A2AWQ2	0.380254	0.106663
NADH dehydrogenase [ubiquinone] 1 alpha subcomplex subunit 13	Ndufa13	Q9ERS2	0.460763	0.106656
Peroxiredoxin-4	Prdx4	O08807	0.0871592	0.106644
ATP-dependent RNA helicase DHX29	Dhx29	Q6PGC1	0.964633	0.106609
WD repeat domain 36	Wdr36	Q3TA68;Q3TAQ9	0.168032	0.106515
Vitamin K epoxide reductase complex subunit 1-like protein 1 (Fragment);Vitamin K epoxide reductase complex subunit 1-like protein 1;Vitamin K epoxide reductase complex subunit 1-like protein 1	Vkorc1l1	A0A0J9YUN6;Q0VGU5;Q6TEK5	0.857308	0.105611
4F2 cell-surface antigen heavy chain	Slc3a2	P10852	0.325708	0.105532
Erbb2ip protein;Erbb2ip protein;Erbin	Erbin	B2RUJ2;B7ZNX6;Q80TH2	0.011667	0.105405
Pre-mRNA-processing factor 40 homolog A (Fragment);Pre-mRNA-processing factor 40 homolog A	Prpf40a	A0A6Q6PUT5;Q9R1C7	0.0458069	0.105066
Valine--tRNA ligase	Vars1	Q9Z1Q9	0.651982	0.104929
Splicing factor 3B subunit 4	Sf3b4	Q8QZY9	0.051868	0.10489
28S ribosomal protein S30, mitochondrial	Mrps30	Q9D0G0	0.149229	0.104828
Haloacid dehalogenase-like hydrolase domain-containing 5	Hdhd5	Q91WM2	0.291893	0.104615
Phosphatidate cytidylyltransferase, mitochondrial;Phosphatidate cytidylyltransferase, mitochondrial	Tamm41	G5E881;Q3TUH1	0.121258	0.104397
Zinc finger protein 629	Znf629	Q6A085	0.52464	0.10413
WD repeat-containing protein 61	Wdr61	Q9ERF3	0.092427	0.104074
ATP synthase subunit g, mitochondrial	Atp5mg	Q9CPQ8	0.183816	0.103743
Small EDRK-rich factor 2	Serf2	P84102	0.402945	0.103738
Zinc finger CCCH domain-containing protein 18	Zc3h18	G3X8T2;H3BIW0;Q0P678	0.0861922	0.103567
TAR DNA-binding protein 43	Tardbp	Q921F2	0.138572	0.103549
Late endosomal/lysosomal adaptor and MAPK and MTOR activator 1;Ragulator complex protein LAMTOR1	Lamtor1	A0A0A6YX02;Q9CQ22	0.637019	0.10334
Calumenin	Calu	O35887	0.203175	0.103123
Sodium channel modifier 1	Scnm1	A0A0R4J262;Q8K136	0.847161	0.103059
Golgi SNAP receptor complex member 1	Gosr1	O88630	0.90737	0.102952
mRNA turnover protein 4 homolog	Mrto4	Q9D0I8	0.302907	0.102935
Vesicle-associated membrane protein-associated protein A	Vapa	Q9WV55	0.243817	0.102683
Intraflagellar transport protein 27 homolog	Ift27	A0A2R8VHI2;Q9D0P8	0.995529	0.102306
3-hydroxyisobutyrate dehydrogenase, mitochondrial	Hibadh	Q99L13	0.110785	0.102302
Armadillo repeat-containing protein 10	Armc10	D3Z5T2;Q9D0L7	0.143848	0.102219
Zinc finger and BTB domain-containing protein 7A (Fragment);Zinc finger and BTB domain-containing protein 7A;Zinc finger and BTB domain-containing protein 7A	Zbtb7a	D3YVF8;D3Z4C3;O88939	0.40946	0.10215
Adenine phosphoribosyltransferase	Aprt	P08030	0.866965	0.10202
Complex I assembly factor ACAD9, mitochondrial;Complex I assembly factor ACAD9, mitochondrial	Acad9	A0A0G2JDY4;Q8JZN5	0.0574921	0.101871
[Tau protein] kinase;Glycogen synthase kinase-3 alpha	Gsk3a	D3Z7E5;Q2NL51	0.845211	0.101794
Dual specificity tyrosine-phosphorylation-regulated kinase 1A	Dyrk1a	Q61214	0.21857	0.101719
Tyrosine-protein phosphatase non-receptor type 23	Ptpn23	Q6PB44	0.197517	0.101605
28S ribosomal protein S22, mitochondrial	Mrps22	Q9CXW2	0.128219	0.101498
N-alpha-acetyltransferase 50	Naa50	Q6PGB6	0.035912	0.101338
mRNA-capping enzyme	Rngtt	O55236	0.0420835	0.101237
F-box-like/WD repeat-containing protein TBL1X	Tbl1x	Q9QXE7	0.419978	0.101232
Tubulin alpha chain (Fragment);Tubulin alpha-4A chain	Tuba4a	A0A0A0MQA5;P68368	0.133727	0.10116
Heat shock protein HSP 90-alpha	Hsp90aa1	P07901	0.0717227	0.101125
Negative elongation factor A	Nelfa	Q8BG30	0.523019	0.100921
K(+) channel subunit beta-2;Voltage-gated potassium channel subunit beta-2;K(+) channel subunit beta-2	Kcnab2	A0A571BGH0;P62482;Q3UPV6	0.240547	0.100605
Pleckstrin homology domain-containing family O member 2	Plekho2	Q8K124	0.26605	0.100557
Vacuolar-sorting protein SNF8	Snf8	A2A6M1;Q9CZ28	0.338778	0.100456
Histone H3-like centromeric protein A;Histone H3-like centromeric protein A (Fragment);Histone H3-like centromeric protein A	Cenpa	A0A0G2JEV2;A0A0G2JGI2;O35216	0.0580802	0.100373
39S ribosomal protein L53, mitochondrial	Mrpl53	Q9D1H8	0.54772	0.100345
Phosphoserine aminotransferase	Psat1	Q99K85	0.655884	0.100245
RNA polymerase-associated protein LEO1	Leo1	Q5XJE5	0.215367	0.100167
mRNA-decapping enzyme 1A	Dcp1a	Q91YD3	0.377289	0.100161
Coatomer subunit gamma-2	Copg2	Q9QXK3	0.025047	0.100056
Cellular nucleic acid-binding protein	Cnbp	A0A0N4SVS6	0.830114	0.100006
AP-2 complex subunit mu	Ap2m1	P84091;Q3TWV4	0.146852	0.0998083
Myc-associated zinc finger protein	Maz	A0A0U1RNL9	0.109469	0.0997175
E3 ubiquitin-protein ligase RBBP6 (Fragment);E3 ubiquitin-protein ligase RBBP6	Rbbp6	A0A338P6W1;P97868	0.451948	0.099655
Programmed cell death protein 4	Pdcd4	Q61823	0.0180756	0.0995781
Propionyl-CoA carboxylase beta chain, mitochondrial;Propionyl-CoA carboxylase beta chain, mitochondrial	Pccb	E9Q1J7;Q99MN9	0.338447	0.0995673
Centromere/kinetochore protein zw10 homolog	Zw10	O54692	0.153642	0.0995318
Nuclear receptor subfamily 2 group C member 2;Nuclear receptor subfamily 2 group C member 2;Nr2c2 protein	Nr2c2	G3X9W4;P49117;Q3ZAR9	0.0318594	0.0993583
Serine/threonine-protein kinase VRK1	Vrk1	A0A1Y7VMH3;Q80X41	0.280303	0.0991803
Family with sequence similarity 71, member A	Fam71a	B7XG49	0.251538	0.0990166
RNA helicase aquarius	Aqr	A2AQA7;Q8CFQ3	0.141149	0.0987444
CUGBP Elav-like family member 1	Celf1	A0A0R4J0T5;P28659	0.221237	0.0983733
Amidophosphoribosyltransferase	Ppat	Q8CIH9	0.455478	0.0980598
Serine/threonine-protein phosphatase 1 regulatory subunit 10	Ppp1r10	Q80W00	0.537164	0.0980186
Exosome complex component RRP46	Exosc5	Q9CRA8	0.130418	0.0979825
Trimethyllysine dioxygenase, mitochondrial	Tmlhe	Q91ZE0	0.38487	0.0979336
Group XIIA secretory phospholipase A2 (Fragment);Group XIIA secretory phospholipase A2	Pla2g12a	A0A0G2JH03;Q9EPR2	0.166806	0.0976683
Arginine/serine-rich coiled-coil protein 2	Rsrc2	A2RTL5;S4R265;S4R2L4	0.537522	0.097653
Nucleoporin p58/p45	Nup58	Q8R332	0.0670655	0.0975807
DNA polymerase delta catalytic subunit	Pold1	P52431	0.0104129	0.097493
A-kinase anchor protein 12	Akap12	A0A668KLD3;A0A668KLV9;Q9WTQ5	0.45257	0.0974405
Inositol 1,4,5-trisphosphate receptor type 3	Itpr3	P70227	0.175754	0.0973574
Amidohydrolase domain-containing protein 2;Amidohydrolase domain-containing protein 2;N-acetylglucosamine-6-phosphate deacetylase	Amdhd2	F6UP77;F7CUP3;Q8JZV7	0.150589	0.097236
CCR4-NOT transcription complex subunit 2	Cnot2	E9Q027;Q8C5L3	0.108747	0.0969631
RNA-binding protein 25	Rbm25	B2RY56	0.148254	0.0967261
Coronin-1C	Coro1c	Q9WUM4	0.0954427	0.0967092
Trafficking protein particle complex subunit 3	Trappc3	O55013	0.578756	0.0965946
Myotrophin	Mtpn	P62774	0.0722542	0.0963951
RNA polymerase-associated protein CTR9 homolog	Ctr9	Q62018	0.256958	0.0963938
CCR4-NOT transcription complex subunit 10	Cnot10	Q8BH15	0.970657	0.0963684
Small acidic protein	Smap	Q9R0P4	0.501476	0.0962383
Isocitrate dehydrogenase [NAD] subunit, mitochondrial;Isocitrate dehydrogenase [NAD] subunit alpha, mitochondrial	Idh3a	A0A1L1STE6;Q9D6R2	0.377145	0.0961088
CTP synthase 1	Ctps1	P70698	0.0369191	0.0960905
28 kDa heat- and acid-stable phosphoprotein	Pdap1	Q3UHX2	0.0412153	0.0960553
Aspartate aminotransferase, cytoplasmic	Got1	P05201	0.351093	0.0959133
Tumor necrosis factor alpha-induced protein 8	Tnfaip8	D3YWJ5	0.0055952	0.0958981
Glyoxalase domain-containing protein 4	Glod4	Q9CPV4	0.0871074	0.0958529
Endoplasmic reticulum resident protein 44	Erp44	Q9D1Q6	0.513933	0.0957162
Unconventional myosin-Ig	Myo1g	Q5SUA5	0.284534	0.0956076
Y-box-binding protein 1	Ybx1	P62960	0.280615	0.0955311
Mitochondrial amidoxime reducing component 2	Mtarc2	Q922Q1	0.124569	0.0953433
Alpha-adducin	Add1	F8WGR0;F8WHZ9;Q9QYC0	0.113607	0.0952182
T-complex protein 1 subunit theta	Cct8	P42932	0.00482713	0.095126
Actin-related protein 6	Actr6	A0A0R4J009;Q9D864	0.847405	0.0949492
U2 snRNP-associated SURP motif-containing protein	U2surp	Q6NV83	0.219924	0.0946846
Protein FAM177A1	Fam177a1	Q8BR63	0.68676	0.0943933
Protein YIPF5	Yipf5	Q9EQQ2	0.406602	0.094171
Cytidine monophosphate-N-acetylneuraminic acid hydroxylase	Cmah	A0A286YDH3;Q61419	0.823071	0.0941425
Mediator complex subunit 25;Mediator complex subunit 25;Mediator complex subunit 25 (Fragment);Mediator of RNA polymerase II transcription subunit 25	Med25	A0A140LHG7;A0A140LHQ0;A0A140LIH0;Q8VCB2	0.0321592	0.094032
Band 4.1;Band 4.1 (Fragment);Band 4.1;Band 4.1;Protein 4.1	Epb41	A0A571BEG4;A2A838;A2A839;A2A841;P48193	0.199884	0.0938948
Sorting nexin-2	Snx2	Q9CWK8	0.21493	0.0937958
Glucose-6-phosphate 1-dehydrogenase X	G6pdx	Q00612	0.228378	0.093784
14-3-3 protein eta	Ywhah	P68510	0.126684	0.0936624
Putative RNA-binding protein 15B	Rbm15b	Q6PHZ5	0.879682	0.0935393
MICOS complex subunit MIC60	Immt	A0A0U1RP81	0.0465397	0.0929808
Tropomyosin alpha-1 chain	Tpm1	G5E8R1	0.986445	0.0927324
ADP-ribose glycohydrolase OARD1	Oard1	Q8R5F3	0.530339	0.0926964
Proteasome activator complex subunit 3	Psme3	P61290	0.0306268	0.0926618
2-deoxy-D-ribose 5-phosphate aldolase;Deoxyribose-phosphate aldolase (Fragment);Deoxyribose-phosphate aldolase	Dera	A0A0N4SV34;A0A0N4SVH5;Q91YP3	0.123976	0.0926127
Transcription regulator protein BACH1	Bach1	P97302	0.535454	0.0923946
Cleavage and polyadenylation specificity factor subunit 7	Cpsf7	Q8BTV2	0.657126	0.0923836
CST complex subunit STN1	Stn1	Q3UXU8;Q8K2X3	0.396117	0.0922527
Sideroflexin-3	Sfxn3	Q91V61	0.44192	0.092114
La-related protein 1	Larp1	Q6ZQ58;Z4YJT3	0.908221	0.0919945
Myb-binding protein 1A	Mybbp1a	Q7TPV4	0.780363	0.0919792
Nap1l4 protein;Nucleosome assembly protein 1-like 4	Nap1l4	B7ZNL2;Q78ZA7	0.0360996	0.0919336
BAG family molecular chaperone regulator 1	Bag1	F6TCF9;Q60739	0.733308	0.0919323
Succinate--CoA ligase [ADP-forming] subunit beta, mitochondrial	Sucla2	Q9Z2I9	0.363655	0.0917407
Alpha-2-macroglobulin receptor-associated protein	Lrpap1	P55302	0.337647	0.0916245
Myocyte-specific enhancer factor 2A	Mef2a	Q60929	0.310173	0.0914517
Delta-1-pyrroline-5-carboxylate synthase	Aldh18a1	Q9Z110	0.129007	0.0913405
Protein phosphatase methylesterase 1	Ppme1	Q8BVQ5	0.28838	0.0906957
TAR DNA-binding protein 43	Tardbp	Q8R0B4	0.192332	0.0906473
Dihydrofolate reductase	Dhfr	P00375	0.1367	0.0906323
Huntingtin-interacting protein K	Hypk	Q9CR41	0.0459024	0.090402
WD repeat-containing protein 5	Wdr5	P61965	0.096917	0.0903362
60S ribosomal protein L7-like 1	Rpl7l1	Q9D8M4	0.234148	0.0902796
Integrator complex subunit 13	IntS13	Q8QZV7	0.174393	0.0902153
Glutamate--cysteine ligase catalytic subunit	Gclc	P97494	0.164109	0.0900863
Heat shock protein HSP 90-beta	Hsp90ab1	P11499	0.195647	0.0899874
Alpha-actinin-4	Actn4	P57780	0.221834	0.0898572
Isovaleryl-CoA dehydrogenase, mitochondrial	Ivd	Q9JHI5	0.705298	0.0896884
H/ACA ribonucleoprotein complex subunit (Fragment);H/ACA ribonucleoprotein complex subunit 1	Gar1	D3YZ09;Q9CY66	0.385358	0.0895215
Poly(rC)-binding protein 2	Pcbp2	Q61990	0.053248	0.0892227
Vesicle-fusing ATPase	Nsf	P46460	0.0737835	0.0891406
E3 SUMO-protein ligase CBX4	Cbx4	O55187	0.129602	0.0891336
Tartrate-resistant acid phosphatase type 5	Acp5	Q05117	0.637236	0.0890657
SUMO-activating enzyme subunit 2	Uba2	Q9Z1F9	0.082046	0.08878
Histone-lysine N-methyltransferase KMT5C	Kmt5c	Q6Q783	0.477776	0.0887605
Isoleucine--tRNA ligase, cytoplasmic	Iars1	Q8BU30	0.22586	0.0886833
CTP synthase 2	Ctps2	P70303	0.251068	0.0884472
SWI/SNF complex subunit SMARCC1	Smarcc1	P97496;Q3UNN4	0.12836	0.0884382
COX assembly mitochondrial protein 2 homolog	Cmc2	Q8K199	0.0791534	0.088202
Nardilysin, N-arginine dibasic convertase, NRD convertase 1;Nardilysin, N-arginine dibasic convertase, NRD convertase 1;Nardilysin	Nrd1;Nrd1;Nrdc	A2A9Q2;A6PWC3;Q8BHG1	0.816756	0.0880121
Nuclear receptor coactivator 1 (Fragment);Nuclear receptor coactivator 1	Ncoa1	A0A1W2P7C1;P70365	0.679199	0.087773
FUN14 domain-containing protein 2	Fundc2	Q9D6K8	0.91067	0.0877399
15-oxoprostaglandin 13-reductase;Prostaglandin reductase 2	Ptgr2	Q3TXN1;Q8VDQ1	0.760331	0.0876189
Glucosidase 2 subunit beta	Prkcsh	O08795	0.244638	0.0876175
Transcriptional repressor p66 alpha	Gatad2a	A0A1I7Q4G8;E9QMN5;Q8CHY6	0.0636979	0.0875978
Acyl-peptide hydrolase (Fragment);Acylamino-acid-releasing enzyme	Apeh	A0A0R4J107;Q8R146	0.0870655	0.0875502
F-box-like/WD repeat-containing protein TBL1XR1	Tbl1xr1	Q8BHJ5	0.153372	0.0873729
N-alpha-acetyltransferase 40	Naa40	A0A494B9D7;Q8VE10	0.0174297	0.0871246
Dual specificity protein kinase CLK3	Clk3	O35492	0.0648688	0.0867977
Nuclear cap-binding protein subunit 1	Ncbp1	Q3UYV9	0.533478	0.0867475
Small subunit processome component 20 homolog	Utp20	E9QK83;Q5XG71	0.869706	0.086734
28S ribosomal protein S33, mitochondrial	Mrps33	Q9D2R8	0.600995	0.0867274
DnaJ homolog subfamily C member 11	Dnajc11	Q5U458	0.558009	0.0865296
ATP-dependent DNA helicase;ATP-dependent DNA helicase Q1	Recql	E9Q3N0;Q9Z129	0.120939	0.0864819
Inner centromere protein	Incenp	Q9WU62	0.470516	0.0864799
ATP synthase subunit beta, mitochondrial	Atp5f1b	P56480	0.0788962	0.086476
Hepatocyte growth factor-regulated tyrosine kinase substrate	Hgs	Q3UMA3;Q99LI8	0.397145	0.0864582
SUMO-activating enzyme subunit 1	Sae1	Q9R1T2	0.177216	0.0863068
Protein HEXIM1	Hexim1	Q8R409	0.133473	0.0860879
GDH/6PGL endoplasmic bifunctional protein	H6pd	A2A7A7;Q8CFX1	0.777039	0.0860777
Ribonucleoside-diphosphate reductase large subunit	Rrm1	P07742	0.559413	0.0859343
Baculoviral IAP repeat-containing protein 6	Birc6	O88738;S4R1L5;S4R2P8	0.231051	0.0858098
SLIT-ROBO Rho GTPase-activating protein 2;SLIT-ROBO Rho GTPase-activating protein 2 (Fragment);SLIT-ROBO Rho GTPase-activating protein 2	Srgap2	A0A087WNM1;A0A087WRV4;Q91Z67	0.897243	0.0857845
Vesicle-associated membrane protein 3	Vamp3	P63024	0.678451	0.0857794
Calcium homeostasis endoplasmic reticulum protein	Cherp	A0A1D5RL92;Q8CGZ0	0.110443	0.08563
Oxysterol-binding protein 1	Osbp	Q3B7Z2	0.82227	0.0854028
Disintegrin and metalloproteinase domain-containing protein 10	Adam10	O35598	0.334883	0.0851094
Neurabin-2	Ppp1r9b	Q6R891	0.168461	0.0847576
Pre-mRNA-processing factor 19	Prpf19	Q99KP6	0.26728	0.084737
Hydroxymethylglutaryl-CoA lyase, mitochondrial	Hmgcl	P38060	0.679517	0.0847138
Signal peptidase complex catalytic subunit SEC11;Signal peptidase complex catalytic subunit SEC11;Signal peptidase complex catalytic subunit SEC11;Signal peptidase complex catalytic subunit SEC11A	Sec11a	D3YTS1;D3YWT0;D3Z569;Q9R0P6	0.217827	0.0846044
Protein diaphanous homolog 1	Diaph1	E9PV41;E9PXV7;O08808	0.256364	0.0845789
Peptidylprolyl isomerase domain and WD repeat-containing protein 1	Ppwd1	Q8CEC6	0.165748	0.084547
Glyceraldehyde-3-phosphate dehydrogenase	Gapdh	P16858	0.0967458	0.0845145
Glycine cleavage system H protein, mitochondrial	Gcsh	Q91WK5	0.121178	0.0845067
Signaling lymphocytic activation molecule	Slamf1	Q9QUM4	0.542061	0.0844455
General transcription factor IIE subunit 2	Gtf2e2	Q9D902	0.639425	0.0842245
Pre-mRNA-splicing factor SPF27	Bcas2	Q9D287	0.308186	0.0840723
Dual-specificity mitogen-activated protein kinase kinase 4 (Fragment);Dual specificity mitogen-activated protein kinase kinase 4	Map2k4	B1ATL6;P47809	0.524765	0.0840659
Glyoxylate reductase 1 homolog	Glyr1	D3YYT1	0.406048	0.0840496
Non-specific serine/threonine protein kinase;Casein kinase I isoform gamma-2;Casein kinase I isoform gamma-3;Non-specific serine/threonine protein kinase	Csnk1g3;Csnk1g2;Csnk1g3;Csnk1g2	A0A494BAP2;Q8BVP5;Q8C4X2;Q99K78	0.882924	0.0838954
Peptidyl-prolyl cis-trans isomerase E	Ppie	Q9QZH3	0.089267	0.0838115
Ras-related protein Rab-5B	Rab5b	P61021	0.872655	0.0837348
39S ribosomal protein L2, mitochondrial;39S ribosomal protein L2, mitochondrial	Mrpl2	B1B1D8;Q9D773	0.355502	0.0836814
Tubulin gamma-1 chain	Tubg1	P83887	0.800563	0.0836499
Cell cycle and apoptosis regulator protein 2	Ccar2	Q8VDP4	0.451029	0.0835821
MAP kinase-activating death domain protein	Madd	A0A0R4J1F4;A2AGQ2;A2AGQ3;A2AGQ4;A2AGQ5;A2AGQ6;A2AGQ7;A2AGQ8;A2AGQ9;A2AGR0;A2AGR1;A6PWP8;E9QN47;Q80U28	0.165361	0.0833918
Integrin alpha-L	Itgal	D3Z627;E9Q5M7;E9QNL8;P24063	0.260051	0.0832095
S-adenosylhomocysteine hydrolase-like protein 1	Ahcyl1	Q80SW1	0.638912	0.0828527
Prothymosin alpha	Ptma	P26350	0.227618	0.0827901
SHC-transforming protein 1	Shc1	P98083	0.0736519	0.0826275
Proteasome subunit alpha type-5	Psma5	Q9Z2U1	0.0140583	0.0825285
T-complex protein 1 subunit alpha	Tcp1	P11983	0.00424722	0.0824714
Mitogen-activated protein kinase;Mitogen-activated protein kinase 7	Mapk7	Q5NCN8;Q9WVS8	0.130181	0.0823954
Proteasome assembly chaperone 1	Psmg1	Q9JK23	0.234564	0.0822908
Poly [ADP-ribose] polymerase 2	Parp2	O88554	0.129875	0.0822092
NADH dehydrogenase [ubiquinone] 1 alpha subcomplex subunit 10, mitochondrial	Ndufa10	Q99LC3	0.143577	0.0822016
CCR4-NOT transcription complex subunit 1	Cnot1	Q6ZQ08	0.0774538	0.0821526
E3 SUMO-protein ligase PIAS4	Pias4	Q9JM05	0.477249	0.0820297
Protein mago nashi homolog	Magoh	P61327	0.120846	0.0819064
DNA-binding protein SATB;DNA-binding protein SATB1	Satb1	E9PVB7;Q60611	0.0651002	0.0817876
Nucleolysin TIAR	Tial1	P70318	0.0132891	0.0817301
CCR4-NOT transcription complex subunit 3	Cnot3	Q8K0V4	0.0126449	0.0814512
Kinesin-like protein;Kinesin-like protein KIF2A	Kif2a	E0CZ72;P28740	0.169047	0.0813239
Anamorsin (Fragment);Anamorsin	Ciapin1	F7BWP1;Q8WTY4	0.435112	0.0812314
Activity-dependent neuroprotector homeobox protein 2	Adnp2	Q8CHC8	0.787336	0.0810565
Obg-like ATPase 1	Ola1	Q9CZ30	0.0193658	0.0809087
Bromodomain-containing protein 3	Brd3	Q8K2F0	0.833372	0.0808267
Protein RCC2	Rcc2	Q8BK67	0.117108	0.0807654
Acidic leucine-rich nuclear phosphoprotein 32 family member E	Anp32e	P97822	0.313202	0.0805566
NADH dehydrogenase [ubiquinone] 1 beta subcomplex subunit 7	Ndufb7	Q9CR61	0.444794	0.0804979
Integrin beta-1	Itgb1	P09055	0.476087	0.0802291
Pre-rRNA-processing protein TSR1 homolog	Tsr1	Q5SWD9	0.0443732	0.0799886
Poly [ADP-ribose] polymerase	Parp1	Q921K2	0.23312	0.0799843
Survival of motor neuron-related-splicing factor 30	Smndc1	Q8BGT7	0.0209475	0.0797827
Cyclin-dependent kinase 11B	Cdk11b	P24788	0.638314	0.0796158
Cytosolic purine 5'-nucleotidase	Nt5c2	A0A494B9X3;A0A494BBP6;E9Q9M1;Q3V1L4	0.0588842	0.0795648
TBC1 domain family member 13	Tbc1d13	Q8R3D1	0.949494	0.079194
Symplekin	Sympk	Q80X82	0.892648	0.0789028
Transcription factor E2F4	E2f4	Q8R0K9	0.847123	0.0787677
Cytochrome b-c1 complex subunit 6, mitochondrial	Uqcrh	P99028	0.670905	0.0787311
Telomere length and silencing protein 1 homolog	NaN	Q3TQI7	0.337819	0.0785947
Rho GTPase-activating protein 27	Arhgap27	A2AB59	0.209978	0.0785209
COMM domain-containing protein 8	Commd8	A0A0G2JH18;Q9CZG3	0.723031	0.0784769
Parafibromin	Cdc73	Q8JZM7	0.0303393	0.0784736
Glutaminase kidney isoform, mitochondrial	Gls	D3Z7P3	0.222154	0.0782723
Serine/threonine-protein kinase 26	Stk26	A2AD84;Q99JT2	0.00851533	0.0782653
Hepatoma-derived growth factor	Hdgf	P51859	0.270627	0.0782623
U3 small nucleolar RNA-associated protein 4 homolog	Utp4	Q8R2N2	0.0130796	0.0782495
Ubiquitin carboxyl-terminal hydrolase 5;Ubiquitin carboxyl-terminal hydrolase	Usp5	P56399;Q3U4W8	0.0788734	0.0778507
F-actin-capping protein subunit alpha-2	Capza2	P47754	0.0337516	0.0778407
Apo-1 antigen;Tumor necrosis factor receptor superfamily member 6	Fas	A0A494BBP5;P25446	0.422165	0.0777504
Progranulin	Grn	P28798;Q3U9N4	0.996939	0.077739
Bifunctional 3'-phosphoadenosine 5'-phosphosulfate synthase 1	Papss1	Q60967	0.638483	0.077649
26S proteasome regulatory subunit 8	Psmc5	P62196	0.416606	0.0776452
Probable global transcription activator SNF2L2	Smarca2	F2Z4A9;H3BLH0;Q6DIC0	0.308148	0.0775725
Putative transferase CAF17 homolog, mitochondrial	Iba57	Q8CAK1	0.953419	0.0771394
Retinoic acid receptor RXR-beta	Rxrb	P28704;Q3TWJ1;Q8VCR0	0.156536	0.0771044
Integrin-linked protein kinase	Ilk	O55222	0.0719887	0.0767028
Lysosomal alpha-mannosidase	Man2b1	O09159	0.485114	0.0766877
Adenosine 5'-monophosphoramidase HINT3	Hint3	Q9CPS6	0.141762	0.0766426
Alpha-actinin-1	Actn1	Q7TPR4	0.510523	0.0766014
Nuclear export mediator factor Nemf	Nemf	Q8CCP0	0.251725	0.0764722
ATP-binding cassette sub-family E member 1	Abce1	P61222	0.141417	0.0763941
Non-specific serine/threonine protein kinase;Ribosomal protein S6 kinase beta-2	Rps6kb2	D3YWB8;Q9Z1M4	0.437336	0.0761593
Apoptosis inhibitor 5	Api5	O35841	0.0214465	0.0761329
2,4-dienoyl-CoA reductase [(3E)-enoyl-CoA-producing], mitochondrial	Decr1	Q9CQ62	0.174346	0.0760577
Peptidyl-tRNA hydrolase 2, mitochondrial	Ptrh2	Q8R2Y8	0.902417	0.0759964
RING-type E3 ubiquitin-protein ligase PPIL2	Ppil2	Q9D787	0.319192	0.0754764
Glycerol-3-phosphate dehydrogenase;Glycerol-3-phosphate dehydrogenase, mitochondrial	Gpd2	A2AQR0;Q64521	0.140395	0.0753929
Sec24-related gene family, member B (S. cerevisiae)	Sec24b	Q80ZX0	0.0645692	0.0752896
ATP-dependent DNA/RNA helicase DHX36	Dhx36	Q8VHK9	0.0567248	0.0752173
Cytochrome c oxidase subunit 4 isoform 1, mitochondrial	Cox4i1	P19783	0.142632	0.0751903
U1 small nuclear ribonucleoprotein A	Snrpa	Q62189	0.147193	0.0751564
MORF4 family-associated protein 1	Mrfap1	Q9CQL7	0.614814	0.0750474
NFATC2-interacting protein	Nfatc2ip	O09130	0.203245	0.0749065
CapZ-interacting protein	Rcsd1	Q3UZA1	0.752651	0.0747162
SUN domain-containing protein 2	Sun2	Q8BJS4	0.436133	0.0745644
Transcription factor Sp3	Sp3	O70494	0.580881	0.0745442
Hexokinase;Hexokinase-1	Hk1	G3UVV4;P17710	0.25576	0.0743061
Annexin A5	Anxa5	P48036	0.171305	0.0740794
39S ribosomal protein L3, mitochondrial (Fragment);39S ribosomal protein L3, mitochondrial;39S ribosomal protein L3, mitochondrial;39S ribosomal protein L3, mitochondrial	Mrpl3	A0A1L1SU47;D3Z456;F6W7C7;Q99N95	0.632857	0.0740601
ATP-dependent 6-phosphofructokinase, liver type	Pfkl	P12382	0.493623	0.0740293
Keratin, type I cytoskeletal 15;Keratin, type I cytoskeletal 15	Krt15	B1AQ77;Q61414	0.881333	0.0739892
Pyruvate dehydrogenase E1 component subunit beta, mitochondrial	Pdhb	Q9D051	0.271492	0.0739103
CAAX prenyl protease 1 homolog	Zmpste24	Q80W54	0.152367	0.0737573
NAD-dependent protein deacetylase sirtuin-7	Sirt7	Q8BKJ9	0.610645	0.0736836
Heat shock protein 105 kDa	Hsph1	E9Q0U7;Q61699	0.367108	0.0736298
Aminopeptidase B	Rnpep	E9PYF1;Q8VCT3	0.817816	0.073619
Histone-lysine N-methyltransferase, H3 lysine-36-specific	Nsd1	E9QAE4	0.823015	0.0734525
DCN1-like protein 1	Dcun1d1	Q9QZ73	0.0242548	0.0730882
Myocyte-specific enhancer factor 2D;Myocyte-specific enhancer factor 2D;Myocyte enhancer factor 2D	Mef2d	E9Q5E0;Q63943;Q921S6	0.0121493	0.0729047
MMS19 nucleotide excision repair protein homolog	Mms19	Q9D071	0.987103	0.072759
Thymidylate synthase	Tyms	P07607	0.393579	0.0724663
Polyribonucleotide 5'-hydroxyl-kinase Clp1	Clp1	Q99LI9	0.322097	0.0723389
Mediator of RNA polymerase II transcription subunit 12	Med12	A2AGH6;A2AGH8;A2AGH9	0.035063	0.0723048
Cytochrome c oxidase subunit 6C	Cox6c	Q9CPQ1	0.334655	0.0722505
Replication protein A 32 kDa subunit	Rpa2	Q3TE40;Q62193	0.135692	0.0722369
Cell division cycle and apoptosis regulator protein 1	Ccar1	Q8CH18	0.30517	0.0721492
Zinc finger protein 346	Zfp346;Zfp346;Znf346	E9PYN2;E9Q7N8;Q9R0B7	0.726628	0.0721201
Angio-associated migratory protein	Aamp	J3QN89;Q3TJ22	0.683211	0.0717842
Pumilio homolog 3	Pum3	A0A0N4SUH4;Q8BKS9	0.354126	0.0716581
GTP-binding nuclear protein Ran	Ran	P62827	0.276981	0.0715992
SCO-spondin	Sspo	A0A1D5RLZ9;E9Q0I4;Q8CG65	0.560154	0.0715656
CXXC motif containing zinc binding protein	Czib	A2A8E2;Q8BHG2	0.832451	0.0713126
60S acidic ribosomal protein P1	Rplp1	P47955	0.356313	0.071246
26S proteasome non-ATPase regulatory subunit 5	Psmd5	Q8BJY1	0.0731882	0.0711397
Cytochrome b-245 chaperone 1	Cybc1	Q3TYS2	0.566246	0.0710937
Rho GDP-dissociation inhibitor 1	Arhgdia	Q99PT1	0.039862	0.0709291
Fragile X mental retardation syndrome-related protein 1	Fxr1	Q61584	0.107834	0.0708439
AP-1 complex subunit mu-1	Ap1m1	P35585	0.000279243	0.0707297
Pleckstrin homology domain-containing family F member 2	Plekhf2	Q91WB4	0.0220309	0.0706983
COX assembly mitochondrial protein homolog	Cmc1	Q9CPZ8	0.299191	0.0703211
Mothers against decapentaplegic homolog;Mothers against decapentaplegic homolog 2	Smad2	E9Q3M0;Q62432	0.202253	0.0700185
Prosaposin	Psap	E9PZ00;Q8BFQ1	0.836623	0.069954
Spindlin-1	Spin1	Q61142	0.677317	0.0696244
Set1/Ash2 histone methyltransferase complex subunit ASH2	Ash2l	E9PU93;Q91X20	0.400922	0.0694783
Death-inducer obliterator 1	Dido1	Q8C9B9	0.495921	0.0694777
Peptidyl-prolyl cis-trans isomerase FKBP3	Fkbp3	Q62446	0.308547	0.0692352
Mitochondrial-processing peptidase subunit beta	Pmpcb	Q9CXT8	0.606946	0.069231
Tumor necrosis factor receptor type 1-associated DEATH domain protein	Tradd	Q3U0V2	0.167269	0.0690333
Plasminogen activator inhibitor 1 RNA-binding protein	Serbp1	A0A0N4SV32;Q3UMP4;Q9CY58	0.25567	0.0688914
Golgin subfamily A member 5	Golga5	Q9QYE6	0.310954	0.0685973
La-related protein 4	Larp4	A0A2R8VKL5;A0A2R8W6Y5;E9Q066;G3X9Q6;Q8BWW4	0.467235	0.068405
Alcohol dehydrogenase class-3	Adh5	P28474	0.0214441	0.0682648
Lysine-specific demethylase 5B	Kdm5b	Q80Y84	0.149089	0.0682188
PAX3- and PAX7-binding protein 1	Paxbp1	P58501	0.354192	0.0681979
Gamma-parvin (Fragment);Gamma-parvin;Gamma-parvin	Parvg	A0A2I3BS32;E9PYG5;Q9ERD8	0.0386557	0.0681611
Eukaryotic translation initiation factor 4C;Eukaryotic translation initiation factor 1A	Eif1a	A0A494BB95;Q60872	0.457687	0.0680775
Histone-binding protein RBBP7	Rbbp7	Q60973	0.410291	0.067943
39S ribosomal protein L18, mitochondrial	Mrpl18	Q9CQL5	0.231257	0.0679153
Guanine nucleotide-binding protein-like 1	Gnl1	P36916	0.331125	0.0678129
Enoyl-CoA delta isomerase 2	Eci2	Q3TCD4;Q9WUR2	0.350186	0.0677165
V-type proton ATPase subunit B, brain isoform	Atp6v1b2	P62814	0.0926969	0.0677155
B-TFIID TATA-box-binding protein-associated factor 1	Btaf1	E9QAE3	0.544751	0.0677003
Apoptosis-associated speck-like protein containing a CARD	Pycard	Q9EPB4	0.366666	0.06755
Enhancer of mRNA-decapping protein 3	Edc3	Q8K2D3	0.437043	0.0673052
H/ACA ribonucleoprotein complex subunit DKC1	Dkc1	Q9ESX5	0.433913	0.0672566
Core histone macro-H2A.1	Macroh2a1	Q9QZQ8	0.210651	0.0671827
Guanine nucleotide-binding protein G(s) subunit alpha isoforms short;Guanine nucleotide-binding protein G(s) subunit alpha isoforms XLas;Guanine nucleotide-binding protein G(s) subunit alpha isoforms short	Gnas	P63094;Q6R0H7;Z4YKV1	0.0406086	0.0670938
Programmed cell death 6-interacting protein	Pdcd6ip	Q9WU78	0.100353	0.0669624
Glucose-6-phosphate isomerase	Gpi	P06745	0.288144	0.0668302
Asparagine--tRNA ligase;Asparagine--tRNA ligase, cytoplasmic	Nars;NARS1	A0A498WGK2;Q8BP47	0.126074	0.0666119
Dihydrolipoyllysine-residue succinyltransferase component of 2-oxoglutarate dehydrogenase complex, mitochondrial	Dlst	Q9D2G2	0.524015	0.0665641
40S ribosomal protein S15a	Rps15a	P62245	0.0245468	0.0662779
Delta-1-pyrroline-5-carboxylate dehydrogenase, mitochondrial	Aldh4a1	Q8CHT0	0.656842	0.0662267
Eukaryotic translation initiation factor 3 subunit A	Eif3a	P23116	0.0670041	0.0661864
Ceramide synthase 6	Cers6	H3BL08;Q8C172	0.146441	0.0661571
RNA-binding motif protein, X chromosome	Rbmx	Q9WV02	0.977975	0.0661261
DNA replication licensing factor MCM2	Mcm2	P97310	0.155128	0.0659241
Methylated-DNA--protein-cysteine methyltransferase	Mgmt	P26187	0.568986	0.0657541
ATP-dependent RNA helicase DDX18	Ddx18	Q8K363	0.936352	0.0657491
Single-stranded DNA-binding protein 2 (Fragment);Single-stranded DNA-binding protein 2	Ssbp2	A0A338P6Q9;Q9CYZ8	0.0730754	0.0653173
Ubiquitin-like modifier-activating enzyme 6	Uba6	Q8C7R4	0.273538	0.0652702
ATP-dependent Clp protease proteolytic subunit, mitochondrial	Clpp	O88696	0.258663	0.0651089
AP-2 complex subunit sigma	Ap2s1	A0A0U1RPS0;P62743	0.167845	0.065108
Eukaryotic translation initiation factor 3 subunit G	Eif3g	Q9Z1D1	0.136118	0.0649979
Phosphoserine phosphatase	Psph	Q99LS3	0.310163	0.0647616
RNA 3'-terminal phosphate cyclase	RtcA	Q9D7H3	0.433466	0.0644383
NADH dehydrogenase [ubiquinone] iron-sulfur protein 7, mitochondrial	Ndufs7	Q9DC70	0.435863	0.0640138
Hydroxysteroid dehydrogenase-like protein 2	Hsdl2	Q2TPA8	0.577871	0.0639711
Protein SET (Fragment);Protein SET	Set	A2BE93;Q9EQU5	0.562396	0.0638433
Isocitrate dehydrogenase [NADP], mitochondrial	Idh2	P54071	0.139272	0.0638084
Ubiquitin-conjugating enzyme E2 R1;Ubiquitin-conjugating enzyme E2 R1 (Fragment);Ubiquitin-conjugating enzyme E2 R1 (Fragment);Ubiquitin-conjugating enzyme E2 R1	Cdc34	A0A1W2P7U1;A0A1W2P7U9;A0A1W2P8B1;Q8CFI2	0.714986	0.0637579
Nuclear pore complex protein Nup93	Nup93	Q8BJ71	0.373282	0.0633815
Anaphase-promoting complex subunit 7	Anapc7	D3YU58;Q9WVM3	0.456011	0.0633011
ATP synthase subunit f, mitochondrial	Atp5mf	P56135	0.0378937	0.0631624
Annexin;Annexin A6	Anxa6	F8WIT2;P14824	0.478537	0.0629237
ATP-citrate synthase	Acly	Q3V117	0.103094	0.0629172
Ankyrin repeat domain-containing protein 17	Ankrd17	A0A0G2JDZ9;A0A1W2P6X1;E9Q804;E9QKG6;Q99NH0	0.285016	0.0628778
Arginine and glutamate-rich protein 1	Arglu1	Q3UL36	0.87236	0.0625761
Nuclear migration protein nudC	Nudc	O35685	0.774859	0.0624906
YTH domain-containing family protein 2	Ythdf2	Q91YT7	0.931146	0.0623755
HECT-type E3 ubiquitin transferase;E3 ubiquitin-protein ligase HECTD1	Hectd1	F8WIE5;Q69ZR2	0.109006	0.0618409
Eukaryotic peptide chain release factor GTP-binding subunit ERF3A	Gspt1	Q8R050	0.0465131	0.0617913
ATP-dependent RNA helicase DDX1	Ddx1	Q91VR5	0.431301	0.06171
SWI/SNF-related matrix-associated actin-dependent regulator of chromatin subfamily A-like protein 1	Smarcal1	Q8BJL0	0.312241	0.0616741
14-3-3 protein zeta/delta	Ywhaz	P63101	0.497321	0.0616276
Isoleucyl-tRNA synthetase;Isoleucyl-tRNA synthetase;Isoleucine--tRNA ligase, mitochondrial	Iars2	E9PWN2;E9PWN3;Q8BIJ6	0.401358	0.0613643
Ras-related protein Rab-4B	Rab4b	Q91ZR1;S4R232	0.420256	0.0613586
Serine/threonine-protein phosphatase 6 regulatory ankyrin repeat subunit B	Ankrd44	B2RXR6	0.881924	0.061228
Integrator complex subunit 5	Ints5	Q8CHT3	0.395385	0.0612024
ATP-dependent RNA helicase DDX19A	Ddx19a	Q61655	0.392748	0.0606732
Transcription initiation factor TFIID subunit 11	Taf11	Q99JX1	0.248787	0.0606663
Leucine carboxyl methyltransferase 1	Lcmt1	A0A0U1RNF2;A2RTH5	0.573753	0.0604768
ER membrane protein complex subunit 7	Emc7	Q9EP72	0.12621	0.0601274
Eukaryotic translation initiation factor 1	Eif1	P48024	0.863055	0.0598419
Aconitate hydratase, mitochondrial	Aco2	Q99KI0	0.0763714	0.059625
Polypyrimidine tract-binding protein 1	Ptbp1	Q8BGJ5;Q922I7	0.210744	0.0595434
N(G),N(G)-dimethylarginine dimethylaminohydrolase 2	Ddah2	Q99LD8	0.64078	0.059136
Heat shock 70 kDa protein 4L	Hspa4l	P48722	0.378774	0.0590229
Mitochondrial peptide methionine sulfoxide reductase	Msra	Q9D6Y7	0.293944	0.0588827
Mesencephalic astrocyte-derived neurotrophic factor;Armet protein	Manf	Q3TMX5;Q80ZP8	0.367696	0.0588256
Nuclear pore complex protein Nup88	Nup88	Q8CEC0	0.248925	0.0588104
Nucleolar protein 14	Nop14	Q8R3N1	0.415378	0.0587538
BAG family molecular chaperone regulator 4	Bag4	Q8CI61	0.267442	0.0586945
Importin subunit alpha-3	Kpna4	O35343	0.467262	0.0586388
Selenocysteine lyase	Scly	Q9JLI6	0.317465	0.0585217
Tumor protein p53-inducible protein 11 (Fragment);Tumor protein p53-inducible protein 11	Trp53i11	A2AGS6;Q4QQM4	0.244948	0.0582403
Choline dehydrogenase, mitochondrial	Chdh	Q8BJ64	0.74305	0.0582023
E3 UFM1-protein ligase 1	Ufl1	Q8CCJ3	0.784397	0.0581627
Y+L amino acid transporter 2 (Fragment);Y+L amino acid transporter 2;Y+L amino acid transporter 2 (Fragment);Y+L amino acid transporter 2	Slc7a6	A0A1D5RM43;A0A1D5RMA4;A0A1D5RMI7;Q8BGK6	0.126444	0.0581337
Prosalusin (Fragment);Prosalusin;Torsin-2A	Tor2a	H3BK73;P0C7W3;Q8R1J9	0.283073	0.05792
Non-specific serine/threonine protein kinase;Non-specific serine/threonine protein kinase;Non-specific serine/threonine protein kinase;Non-specific serine/threonine protein kinase;Non-specific serine/threonine protein kinase;Casein kinase I isoform gamma-1	Csnk1g1	A0A0U1RNW0;A0A0U1RP94;A0A0U1RPD7;A0A0U1RPM8;Q6P2B2;Q8BTH8	0.516084	0.057883
Phosducin-like protein	Pdcl	Q9DBX2	0.749876	0.0578692
Ran-binding protein 3	Ranbp3	A0A3B2WCL5;Q9CT10	0.223158	0.0576925
F-actin-capping protein subunit alpha-1;F-actin-capping protein subunit alpha	Capza1	P47753;Q5RKN9	0.156865	0.0576799
Small integral membrane protein 11	Smim11	Q99J19	0.734805	0.0576108
Mediator of RNA polymerase II transcription subunit 15	Med15	E9Q7C1;Q3TE00;Q924H2	0.280802	0.0575164
T-complex protein 1 subunit eta	Cct7	P80313	0.736834	0.0571139
Structural maintenance of chromosomes protein 6	Smc6	Q924W5	0.351318	0.0571075
Ubiquinone biosynthesis O-methyltransferase, mitochondrial	Coq3	Q8BMS4	0.164796	0.0571054
HECT-type E3 ubiquitin transferase;E3 ubiquitin-protein ligase HUWE1	Huwe1	A2AFQ0;Q7TMY8	0.279613	0.0570585
26S proteasome AAA-ATPase subunit RPT3;26S proteasome regulatory subunit 6B	Psmc4	A0A140LIZ5;P54775	0.814254	0.056985
Spliceosome-associated protein CWC15 homolog	Cwc15	Q9JHS9	0.600871	0.05684
S-formylglutathione hydrolase	Esd	Q9R0P3	0.401848	0.0566569
Multifunctional protein ADE2	Paics	Q9DCL9	0.116295	0.0566077
Stromal membrane-associated protein 2	Smap2	Q7TN29	0.374733	0.0565261
Signal-induced proliferation-associated protein 1	Sipa1	E9Q0Y4;P46062;Q3V403	0.856728	0.0564826
DNA replication licensing factor MCM4	Mcm4	P49717	0.16306	0.056452
Acyl-coenzyme A thioesterase 13	Acot13	Q9CQR4	0.671301	0.0564274
Spermine synthase	Sms	P97355	0.451398	0.0564265
Aldehyde dehydrogenase family 16 member A1	Aldh16a1	A0A1B0GSU0;Q571I9	0.511706	0.0563975
Telomerase-binding protein EST1A	Smg6	P61406	0.815183	0.0559955
HBS1-like protein	Hbs1l	Q3TGM7;Q69ZS7	0.222841	0.0559422
Mitochondrial-processing peptidase subunit alpha	Pmpca	Q9DC61	0.127773	0.0553919
Stromal interaction molecule 2	Stim2	I1E4X8;P83093	0.408139	0.0552194
Muscleblind-like protein 3	Mbnl3	Q8R003;S4R267	0.740442	0.0551643
ATP-binding cassette sub-family F member 2	Abcf2	Q99LE6	0.012392	0.0550637
Reticulocalbin-2	Rcn2	Q8BP92	0.120584	0.0547357
Phytanoyl-CoA hydroxylase-interacting protein	Phyhip	Q8K0S0	0.560683	0.0546605
Histone-lysine N-methyltransferase SUV39H1	Suv39h1	O54864	0.254723	0.0546257
DNA primase;DNA primase small subunit	Prim1	J3QN19;P20664	0.508628	0.0546044
39S ribosomal protein L39, mitochondrial	Mrpl39	Q9JKF7	0.336179	0.0544416
60S ribosomal protein L5	Rpl5	P47962	0.915747	0.0543848
Protein AATF	Aatf	Q9JKX4	0.437872	0.0543782
Mediator of DNA damage checkpoint protein 1	Mdc1	E9QK89;Q5PSV9	0.635458	0.0543423
Late endosomal/lysosomal adaptor and MAPK and MTOR activator 5;Ragulator complex protein LAMTOR5	Lamtor5	G3UW70;Q9D1L9	0.209963	0.0541947
Developmentally-regulated GTP-binding protein 1	Drg1	P32233	0.0502256	0.0540774
Male-enhanced antigen 1 (Fragment);Male-enhanced antigen 1	Mea1	A0A3B2WB12;Q64327	0.777372	0.0539457
Nucleobindin-1	Nucb1	Q02819	0.222983	0.0538807
Rho guanine nucleotide exchange factor 1	Arhgef1	E9PUF7	0.103389	0.0538651
Sideroflexin-1	Sfxn1	Q99JR1	0.99293	0.0537917
T-cell surface glycoprotein CD3 gamma chain (Fragment);T-cell surface glycoprotein CD3 gamma chain	Cd3g	E0CXP3;P11942	0.191006	0.0537331
NADH dehydrogenase [ubiquinone] flavoprotein 1, mitochondrial;NADH dehydrogenase [ubiquinone] flavoprotein 1, mitochondrial	Ndufv1	D3YUM1;Q91YT0	0.228469	0.0537186
Omega-amidase NIT2	Nit2	Q9JHW2	0.777079	0.0536007
Cleavage stimulation factor subunit 1	Cstf1	Q99LC2	0.44035	0.0534853
Succinate dehydrogenase [ubiquinone] flavoprotein subunit, mitochondrial	Sdha	Q8K2B3	0.426958	0.053419
T-complex protein 1 subunit beta	Cct2	P80314	0.241844	0.053404
Calcium/calmodulin-dependent protein kinase type II subunit gamma	Camk2g	Q923T9	0.825693	0.0533494
Proliferation-associated protein 2G4	Pa2g4	P50580	0.104138	0.0532178
General transcription factor IIF subunit 1	Gtf2f1	Q3THK3	0.284115	0.0530022
Eukaryotic translation initiation factor 6	Eif6	O55135	0.369049	0.0529951
RNA-binding protein 39	Rbm39	Q8VH51	0.664567	0.0529926
Tyrosine-protein kinase ITK/TSK;Tyrosine-protein kinase	Itk	Q03526;Q5STT8	0.348622	0.052979
DnaJ homolog subfamily A member 3, mitochondrial	Dnaja3	Q99M87	0.670551	0.052907
Ubiquitin-like protein 4A	Ubl4a	P21126	0.177758	0.0527005
Bcl-2-like protein 13	Bcl2l13	P59017	0.885613	0.0525686
PDZ domain-containing protein 8	Pdzd8	B9EJ80	0.567875	0.0524385
GTP-binding protein 4	Gtpbp4	Q99ME9	0.0645771	0.0522712
Nucleoporin Nup43	Nup43	P59235	0.0382676	0.052256
Dipeptidyl peptidase 4	Dpp4	P28843	0.669921	0.0521807
Snf2-related CREBBP activator protein;Snf2-related CREBBP activator protein;Predicted gene 42715 (Fragment);Snf2-related CREBBP activator protein	Srcap;Srcap;Gm42715;Srcap	A0A087WNL7;A0A087WNX7;A0A087WP63;A0A087WQ44	0.903298	0.0520997
Aspartate aminotransferase, mitochondrial	Got2	P05202	0.168664	0.0520162
General transcription factor IIF subunit 2	Gtf2f2	Q8R0A0	0.833499	0.0519784
Cyclin-dependent kinase 19	Cdk19	G5E8L1;Q8BWD8	0.0688243	0.0518806
DNA (cytosine-5)-methyltransferase 1	Dnmt1	P13864	0.608155	0.0516333
Peroxiredoxin-6	Prdx6	Q6GT24	0.617443	0.0513945
DNA helicase B	Helb	Q6NVF4	0.234413	0.0513657
Barrier-to-autointegration factor	Banf1	O54962	0.302837	0.0512198
Arf-GAP with coiled-coil, ANK repeat and PH domain-containing protein 1	Acap1	Q8K2H4	0.0318566	0.051112
Lysophosphatidic acid phosphatase type 6	Acp6	Q8BP40	0.628908	0.051077
DNA ligase;DNA ligase 3;DNA ligase;DNA ligase	Lig3	K4DI59;P97386;Q3UC82;Q80ZH7	0.738945	0.0509542
Replication factor C subunit 2	Rfc2	Q9WUK4	0.356994	0.0509004
Myeloid-derived growth factor	Mydgf	Q9CPT4	0.312856	0.0508388
Nuclear RNA export factor 1	Nxf1	Q99JX7	0.551322	0.0506127
AT-rich interactive domain-containing protein 2	Arid2	E9Q7E2	0.253539	0.0505888
39S ribosomal protein L44, mitochondrial	Mrpl44	Q9CY73	0.387184	0.0505781
RNA-binding protein Musashi homolog 2	Msi2	Q920Q6	0.400839	0.050477
Host cell factor 1	Hcfc1	Q61191	0.367903	0.0504634
Translation machinery-associated protein 7	Tma7	Q8K003	0.188133	0.050459
Parkinson disease protein 7 homolog	Park7	Q99LX0	0.492238	0.0504163
Acylphosphatase;Acylphosphatase-1	Acyp1	E9QJT5;P56376	0.668344	0.0503788
Death domain-associated protein 6;Daxx	Daxx	O35613;Q3UKR0	0.248906	0.0503648
Tuftelin-interacting protein 11	Tfip11	Q9ERA6	0.0701681	0.0503132
Glucocorticoid modulatory element-binding protein 2	Gmeb2	P58929	0.559016	0.0503113
WW domain-binding protein 11	Wbp11	Q923D5	0.793056	0.0501817
T-complex protein 1 subunit zeta;Chaperonin containing Tcp1, subunit 6a (Zeta)	Cct6a	P80317;Q52KG9	0.86753	0.0501131
Alpha-taxilin	Txlna	Q6PAM1	0.172193	0.049899
MICOS complex subunit Mic60	Immt	Q8CAQ8	0.744653	0.0498857
Heterogeneous nuclear ribonucleoprotein K	Hnrnpk	B2M1R6	0.85228	0.0497894
Serine/threonine-protein phosphatase 4 regulatory subunit 2	Ppp4r2	A0A0R4J0U2;Q0VGB7	0.92707	0.0495591
Interferon-stimulated 20 kDa exonuclease-like 2	Isg20l2	A0A0R4J0R3;Q3U1G5	0.194024	0.0495211
Gem-associated protein 8	Gemin8	B1AVP5;Q8BHE1	0.370648	0.0495175
Rho GTPase-activating protein 45	Arhgap45	G3X9Q3;Q3TBD2	0.322202	0.0494273
Tyrosine--tRNA ligase, cytoplasmic	Yars1	Q91WQ3	0.266919	0.0494119
DNA replication licensing factor MCM3	Mcm3	P25206	0.36171	0.0493782
Adenosine deaminase	Ada	P03958	0.369763	0.0493733
Ras-related protein Rap-1A	Rap1a	A0A0G2JDL9;P62835	0.876648	0.0492348
La-related protein 7	Larp7	Q05CL8	0.826736	0.0491617
Cyclin-dependent-like kinase 5	Cdk5	P49615	0.914204	0.0490149
RNA-binding protein 26	Rbm26	E9Q640;Q6NZN0	0.955877	0.048927
F-actin-capping protein subunit beta	Capzb	P47757	0.0627488	0.0489001
Tubulin beta-3 chain	Tubb3	Q9ERD7	0.732227	0.0488878
Target of Myb protein 1 (Fragment);Target of Myb protein 1;Target of Myb protein 1	Tom1	A0A1D5RL90;O88746;Q3UDC3	0.538551	0.048805
Nuclear fragile X mental retardation-interacting protein 2	Nufip2	Q5F2E7	0.191003	0.0487867
Nuclear receptor coactivator	Ncoa3	A2A468;Q05BA5	0.328244	0.0487751
Glutamine-rich protein 1;Transcriptional regulator QRICH1	Qrich1	G3X8R5;Q3UA37	0.915795	0.0487232
U4/U6 small nuclear ribonucleoprotein Prp4	Prpf4	Q9DAW6	0.419159	0.0486911
Serine/threonine-protein phosphatase 2A 65 kDa regulatory subunit A alpha isoform	Ppp2r1a	Q76MZ3	0.498527	0.0486381
Rho-associated protein kinase 2 (Fragment);Rho-associated protein kinase;Rho-associated protein kinase 2	Rock2	A0A1Y7VMN0;F8VPK5;P70336	0.696469	0.048613
Mediator of RNA polymerase II transcription subunit 1	Med1	B1AQH6;Q925J9	0.566701	0.0485077
PC4 and SFRS1-interacting protein	Psip1	Q99JF8	0.256539	0.0483753
GTP-binding protein 1	Gtpbp1	O08582	0.406887	0.048214
GMP synthase [glutamine-hydrolyzing]	Gmps	Q3THK7	0.204024	0.0480584
Fatty acid synthase	Fasn	P19096	0.198034	0.0480531
Ubiquitin-associated protein 2-like	Ubap2l	Q80X50	0.435514	0.0480434
GTPase-activating protein and VPS9 domain-containing protein 1	Gapvd1	Q6PAR5	0.476497	0.047991
Sperm-associated antigen 7	Spag7	Q7TNE3	0.593431	0.0479264
Condensin complex subunit 1	Ncapd2	A0A0R4J0H7;Q8K2Z4	0.736599	0.0477166
4-trimethylaminobutyraldehyde dehydrogenase	Aldh9a1	Q9JLJ2	0.154143	0.0477124
Crooked neck-like protein 1	Crnkl1	P63154	0.0951783	0.0476144
Malonyl-CoA-acyl carrier protein transacylase, mitochondrial (Fragment);Malonyl-CoA-acyl carrier protein transacylase, mitochondrial	Mcat	A0A2R8VHT7;Q8R3F5	0.0249237	0.0474805
Rabankyrin-5	Ankfy1	Q810B6	0.669015	0.0471742
Coiled-coil domain-containing protein 6	Ccdc6	D3YZP9	0.876392	0.0471468
Guanine nucleotide-binding protein subunit gamma (Fragment);Guanine nucleotide-binding protein subunit gamma;Guanine nucleotide-binding protein G(I)/G(S)/G(O) subunit gamma-12	Gng12	A0A0N4SVT3;A0A0N4SW28;Q9DAS9	0.100431	0.0469371
RNA-binding protein 12B-B;RNA-binding protein 12B-A	Rbm12b2;Rbm12b1	Q66JV4;Q80YR9	0.891369	0.0468275
Serine/threonine-protein kinase tousled-like 2	Tlk2	B1ASU9;B7ZC85;O55047	0.776667	0.0468256
Exocyst complex component 8	Exoc8	Q6PGF7	0.191731	0.0468215
26S proteasome regulatory subunit 10B	Psmc6	P62334	0.557795	0.0467881
Proteasome subunit alpha type-6	Psma6	Q9QUM9	0.292707	0.0467818
G-patch domain and KOW motifs-containing protein	Gpkow	Q56A08	0.709569	0.0467774
T-complex protein 1 subunit delta	Cct4	P80315	0.017454	0.0465656
Long-chain specific acyl-CoA dehydrogenase, mitochondrial	Acadl	A0A0R4J083	0.42456	0.0465131
2',3'-cyclic-nucleotide 3'-phosphodiesterase	Cnp	P16330	0.391946	0.0464424
Protein scribble homolog	Scrib	Q80U72	0.0119854	0.0464299
Eukaryotic translation initiation factor 5A (Fragment);Eukaryotic translation initiation factor 5A-1	Eif5a	A0A0A0MQM0;P63242	0.963262	0.0460501
Myristoylated alanine-rich C-kinase substrate	Marcks	P26645	0.876947	0.0460418
Aspartyl aminopeptidase	Dnpep	Q3TVK3;Q9Z2W0	0.0745806	0.0460337
Calreticulin	Calr	P14211	0.199728	0.0457584
Tyrosine-protein kinase	Jak1	B1ASP2	0.385446	0.0457314
Pogo transposable element with ZNF domain	Pogz	D3YUW8;D3YUX1;Q0VGT3;Q8BZH4	0.816074	0.0454437
Peptidyl-prolyl cis-trans isomerase FKBP2	Fkbp2	P45878	0.280083	0.0452975
Pentatricopeptide repeat domain-containing protein 3, mitochondrial	Ptcd3	Q14C51	0.141958	0.0452422
Very long-chain-specific acyl-CoA dehydrogenase, mitochondrial;Very long-chain specific acyl-CoA dehydrogenase, mitochondrial	Acadvl	B1AR28;P50544	0.48248	0.0450966
Ubiquitin-conjugating enzyme E2 L3	Ube2l3	P68037	0.903879	0.0450289
Complement component receptor 1-like protein (Fragment);Complement component receptor 1-like protein;Complement component receptor 1-like protein;Complement component receptor 1-like protein	Cr1l	A0A0A6YVT1;A0A0A6YXN9;A0A0A6YY75;Q64735	0.279081	0.0448823
1,4-alpha-glucan branching enzyme;1,4-alpha-glucan branching enzyme;1,4-alpha-glucan-branching enzyme	Gbe1	F6ZHD8;G3UW30;Q9D6Y9	0.517365	0.0446775
Ras-related protein Ral-A	Rala	P63321	0.358009	0.0446353
Radixin	Rdx	P26043	0.198113	0.0445232
Transformer-2 protein homolog beta	Tra2b	F8WJG3;P62996	0.457173	0.0445033
Importin subunit alpha-5	Kpna1	Q60960	0.400926	0.0444118
E3 ubiquitin-protein ligase CBL	Cbl	A0A0U1RQ85;P22682	0.00605661	0.044134
Endonuclease 8-like 1	Neil1	Q8K4Q6	0.747162	0.0440907
Telomerase RNA component interacting RNase	Trir	Q9D735	0.00880847	0.0440448
Endoribonuclease LACTB2	Lactb2	Q99KR3	0.366515	0.0439123
Structural maintenance of chromosomes protein 3	Smc3	Q9CW03	0.564467	0.0439026
Mitochondrial import inner membrane translocase subunit TIM14	Dnajc19	D3Z5K6;G3X8S1;Q9CQV7	0.957883	0.0437554
KIF-binding protein	Kifbp	E0CXN7;H3BIY2;Q6ZPU9	0.219286	0.0436475
Tyrosine-protein kinase;Tyrosine-protein kinase SYK	Syk	E9PWE9;P48025	0.165311	0.0435801
Tetratricopeptide repeat domain 37	Ttc37	F8VPK0	0.638733	0.0433819
Actin, cytoplasmic 2	Actg1	P63260	0.180675	0.043267
Oxygen-dependent coproporphyrinogen-III oxidase, mitochondrial	Cpox	P36552	0.241317	0.0431724
NEDD8-conjugating enzyme Ubc12	Ube2m	P61082	0.34403	0.0431357
Heterogeneous nuclear ribonucleoprotein U-like protein 1	Hnrnpul1	Q8VDM6	0.87688	0.0430415
Serine/arginine-rich splicing factor 1	Srsf1	H7BX95;Q6PDM2	0.347157	0.0429583
Mitochondrial fission 1 protein	Fis1	G3X9U9;Q9CQ92	0.363831	0.0429339
EH domain-containing protein 1	Ehd1	Q9WVK4	0.0820029	0.0429197
Suppressor of SWI4 1 homolog	Ppan	Q91YU8	0.802666	0.042911
14-3-3 protein gamma	Ywhag	P61982	0.969937	0.0429017
Replication factor C subunit 3	Rfc3	Q8R323	0.147739	0.0427538
Tyrosine-protein kinase BAZ1B	Baz1b	Q9Z277	0.113088	0.0426721
40S ribosomal protein S3	Rps3	P62908	0.0977407	0.0426662
7-methylguanosine phosphate-specific 5'-nucleotidase	Nt5c3b	Q3UFY7	0.16475	0.0424087
Cleavage and polyadenylation specificity factor subunit 6	Cpsf6	H3BJ30;H3BJW3;Q6NVF9	0.440923	0.0419116
MICOS complex subunit Mic27	Apool	Q78IK4	0.0644268	0.041807
Splicing factor 3A subunit 2	Sf3a2	G3UVU2	0.678905	0.0417741
Carnitine O-palmitoyltransferase 2, mitochondrial	Cpt2	P52825	0.68712	0.0416115
T-complex protein 1 subunit gamma	Cct3	P80318	0.169287	0.0416035
BUB3-interacting and GLEBS motif-containing protein ZNF207	Znf207	Q9JMD0	0.769972	0.0412867
DNA-dependent protein kinase catalytic subunit	Prkdc	P97313	0.405202	0.0411146
Keratin, type II cytoskeletal 5	Krt5	Q922U2	0.604793	0.0410801
Parathymosin	Ptms	Q9D0J8	0.560608	0.0410022
Constitutive coactivator of PPAR-gamma-like protein 1	FAM120A	Q6A0A9	0.716627	0.0407627
Protein S100-A10	S100a10	P08207	0.655682	0.0407303
Ribonuclease H2 subunit B	Rnaseh2b	Q80ZV0	0.251591	0.0406798
Protein transport protein Sec23B	Sec23b	Q9D662	0.128478	0.040586
Protein polybromo-1	Pbrm1	D3Z1N4;D3Z1W6;E9Q4Y5;E9Q7L2;E9Q7L3;F8VQD1;Q8BSQ9	0.565231	0.0404603
Cleavage and polyadenylation specificity factor subunit 3	Cpsf3	Q9QXK7	0.572966	0.0402965
Mortality factor 4-like protein 2 (Fragment);Mortality factor 4-like protein 2 (Fragment);Mortality factor 4-like protein 2 (Fragment);Mortality factor 4-like protein 2	Morf4l2	A2AEB3;A2AEB4;A2AEB5;Q9R0Q4	0.223918	0.0402916
Nicastrin	Ncstn	P57716	0.630743	0.0402756
Cyclic AMP-responsive element-binding protein 1	Creb1	Q01147;Q62347	0.476872	0.0402146
Eukaryotic translation initiation factor 4 gamma 2	Eif4g2	G3XA17	0.350263	0.0402092
SH3 domain-containing kinase-binding protein 1	Sh3kbp1	Q8R550	0.929821	0.0401823
Ubiquitin carboxyl-terminal hydrolase 10	Usp10	P52479	0.601074	0.0400944
Esterase OVCA2	Ovca2	Q9D7E3	0.241968	0.0400568
RING finger protein unkempt homolog	Unk	Q8BL48	0.621224	0.0399488
U6 snRNA-associated Sm-like protein LSm6	Lsm6	P62313	0.741932	0.0399034
2-oxoglutarate dehydrogenase, mitochondrial;Oxoglutarate dehydrogenase (succinyl-transferring)	Ogdh	Q60597;Z4YJV4	0.730082	0.0398821
ATP-dependent RNA helicase DDX3X	Ddx3x	Q62167	0.00400641	0.0398274
FAS-associated factor 2	Faf2	Q3TDN2	0.00250615	0.0396824
U2 small nuclear ribonucleoprotein B''	Snrpb2	Q9CQI7	0.131495	0.0396727
Beta-mannosidase	Manba	A0A0R4J092;D6RGR1;Q8K2I4	0.15505	0.0396696
DNA-directed RNA polymerase II subunit RPB2	Polr2b	Q8CFI7	0.137945	0.0394578
Intercellular adhesion molecule 2 (Fragment);Intercellular adhesion molecule 2 (Fragment);Intercellular adhesion molecule 2	Icam2	G3UWJ5;G5E8M9;P35330	0.0633559	0.0393447
Outer mitochondrial transmembrane helix translocase	Atad1	A0A494BAB5;Q9D5T0	0.319889	0.0393386
tRNA (uracil-5-)-methyltransferase homolog A	Trmt2a	E9PUQ7;Q3UYU2	0.47568	0.0393256
Flotillin;Flotillin-1	Flot1	G3UYU4;O08917	0.893991	0.0392933
Volume-regulated anion channel subunit LRRC8C	Lrrc8c	Q8R502	0.639358	0.0391684
Tyrosine-protein kinase ZAP-70	Zap70	P43404	0.0505087	0.0389903
Cytochrome c oxidase assembly protein COX16 homolog, mitochondrial;Synaptojanin-2-binding protein	Gm20498;Synj2bp	E9PVN6;Q9D6K5	0.84405	0.038872
Sorting nexin-27	Snx27	Q3UHD6	0.607387	0.0387513
Stathmin	Stmn1	P54227	0.140031	0.0387191
Protein NDRG1	Ndrg1	Q62433	0.387047	0.0385868
NADH dehydrogenase [ubiquinone] 1 beta subcomplex subunit 9	Ndufb9	Q9CQJ8	0.273233	0.0385867
DNA-directed RNA polymerases I, II, and III subunit RPABC1	Polr2e	Q80UW8	0.486344	0.0385671
Sterile alpha motif domain-containing protein 1	Samd1	D3YXK1	0.0220936	0.0385018
Splicing factor 3B subunit 6	Sf3b6	P59708	0.667775	0.0384283
39S ribosomal protein L41, mitochondrial	Mrpl41	Q9CQN7	0.67872	0.0383788
Alanine--tRNA ligase, cytoplasmic	Aars1	Q8BGQ7	0.824877	0.038353
Sodium/potassium-transporting ATPase subunit alpha-1	Atp1a1	Q8VDN2	0.75051	0.0381317
Protein NEDD1	Nedd1	P33215	0.187658	0.0381038
ATP-dependent RNA helicase DHX8	Dhx8	A2A4P0	0.571535	0.037971
Inositol 1,4,5-trisphosphate receptor type 1	Itpr1	P11881	0.214614	0.0379322
Adenylyl cyclase-associated protein 1	Cap1	P40124	0.419606	0.0377951
PDZ and LIM domain protein 1	Pdlim1	O70400	0.462748	0.0375738
Flavin reductase (NADPH)	Blvrb	A0A0U1RPU7;E9PZC3;Q923D2	0.735038	0.0374537
CCR4-NOT transcription complex subunit 9	Cnot9	Q9JKY0	0.0784146	0.0373436
Ubiquilin-4	Ubqln4	Q99NB8	0.616759	0.0373412
39S ribosomal protein L33, mitochondrial	Mrpl33	Q9CQP0	0.823816	0.0373138
Vacuolar protein sorting-associated protein VTA1 homolog	Vta1	Q9CR26	0.366894	0.037261
Dihydropteridine reductase	Qdpr	A0A0G2JGJ1;Q8BVI4	0.429903	0.0370336
Serine/threonine-protein kinase TAO3	Taok3	Q8BYC6	0.0868261	0.0366542
Costars family protein ABRACL	Abracl	Q4KML4	0.16684	0.0366131
NADH dehydrogenase [ubiquinone] 1 beta subcomplex subunit 4	Ndufb4	Q9CQC7	0.982298	0.0363967
Splicing factor 3b, subunit 2	Sf3b2	Q3UJB0	0.93271	0.036175
Microtubule-actin cross-linking factor 1	Macf1	B1ARU4;E9PVY8;E9QA63;Q9QXZ0	0.361646	0.0361315
Developmentally-regulated GTP-binding protein 2	Drg2	Q9QXB9	0.0808975	0.0361064
Spastin	Spast	A0A286YE25;Q9QYY8	0.823963	0.0360711
Cation-independent mannose-6-phosphate receptor	Igf2r	Q07113	0.485058	0.0360111
DNA mismatch repair protein Msh6	Msh6	P54276	0.436775	0.0360089
Coiled-coil domain-containing protein 75;G patch domain-containing protein 11	Gpatch11	A0A0R4J215;Q3UFS4	0.152069	0.0359507
Peptidyl-prolyl cis-trans isomerase B	Ppib	P24369	0.352037	0.0356565
Fanconi anemia group I protein homolog	Fanci	Q8K368	0.269604	0.0356481
Pre-mRNA-processing factor 17	Cdc40	Q9DC48	0.452852	0.0355985
Deoxynucleotidyltransferase terminal-interacting protein 2	Dnttip2	Q8R2M2	0.287568	0.0351856
6-phosphogluconate dehydrogenase, decarboxylating	Pgd	Q9DCD0	0.339274	0.0351335
E3 ubiquitin-protein ligase Itchy	Itch	Q8C863	0.168895	0.0350788
UPF0688 protein C1orf174 homolog	NaN	Q80WR5	0.573581	0.0348978
Thymocyte selection-associated high mobility group box protein TOX	Tox	Q66JW3	0.280761	0.0348898
RIKEN cDNA D030056L22 gene;Uncharacterized protein C9orf40 homolog	D030056L22Rik;	Q3U2A5;Q8VCE4	0.404975	0.0348775
ATP synthase subunit ATP5MJ, mitochondrial	Atp5mj	P56379	0.115338	0.0347771
EEF1A lysine methyltransferase 1	Eef1akmt1	A0A0D2X7Z2;Q9CY45	0.00170591	0.0346837
DNA mismatch repair protein Mlh1	Mlh1	Q9JK91	0.693209	0.0346627
39S ribosomal protein L50, mitochondrial	Mrpl50	Q8VDT9	0.782609	0.0346434
DnaJ homolog subfamily C member 3	Dnajc3	Q91YW3	0.956025	0.0345184
Ubiquilin-2	Ubqln2	Q9QZM0	0.213107	0.0344398
Syntaxin-7	Stx7	O70439;Q8BH40	0.42825	0.0344172
Lysine-specific demethylase 5A	Kdm5a	Q3UXZ9	0.964719	0.0343316
General transcription factor 3C polypeptide 4	Gtf3c4	Q8BMQ2	0.00714929	0.0343184
Cytokine receptor-like factor 3	Crlf3	Q9Z2L7	0.675579	0.0341976
Proliferating cell nuclear antigen	Pcna	P17918	0.639892	0.0341755
Calpain inhibitor (Fragment);Calpastatin;Calpain inhibitor;Calpain inhibitor;Calpain inhibitor;Calpain inhibitor	Cast	A0A338P6J9;P51125;Q8C281;Q8CE04;Q8CE80;Q921U7	0.837539	0.034143
Craniofacial development protein 1	Cfdp1	O88271	0.112063	0.0337982
F-box/LRR-repeat protein 12	Fbxl12	A0A0R4J1W2;Q9EPX5	0.148028	0.0336079
Serine/threonine-protein phosphatase;Serine/threonine-protein phosphatase 6 catalytic subunit	Ppp6c	A0A0N4SVL9;Q9CQR6	0.70662	0.0335609
Lymphocyte-specific helicase	Hells	Q60848	0.0753973	0.0335109
Deoxynucleotidyltransferase terminal-interacting protein 1	Dnttip1	Q99LB0	0.229668	0.0333543
DNA polymerase epsilon subunit 4	Pole4	E0CYA9;Q9CQ36	0.815522	0.0333441
Exportin-7	Xpo7	E9PUW7;Q9EPK7	0.959256	0.0332421
N-alpha-acetyltransferase 16, NatA auxiliary subunit	Naa16	Q9DBB4	0.283514	0.0331779
E3 ubiquitin-protein ligase;NEDD4-like E3 ubiquitin-protein ligase WWP2	Wwp2	A0A1D5RM92;Q9DBH0	0.692887	0.0329793
AH receptor-interacting protein	Aip	O08915	0.300676	0.0329181
Phenylalanine--tRNA ligase;Phenylalanine--tRNA ligase alpha subunit	Farsa	E9PWY9;Q8C0C7	0.258463	0.0327207
RNA polymerase II subunit A C-terminal domain phosphatase SSU72	Ssu72	Q9CY97	0.528733	0.0325842
Tether containing UBX domain for GLUT4	Aspscr1	Q8VBT9	0.311965	0.0325234
Carbonyl reductase [NADPH] 1	Cbr1	P48758	0.556265	0.0325082
RNA-binding protein FUS;Fusion, derived from t(1216) malignant liposarcoma (Human)	Fus	P56959;Q8CFQ9	0.838746	0.0324904
Succinate--CoA ligase [ADP/GDP-forming] subunit alpha, mitochondrial	Suclg1	Q9WUM5	0.63921	0.0323149
Lysine-specific demethylase 4A	Kdm4a	Q8BW72	0.409361	0.0322894
Nuclear transport factor 2	Nutf2	P61971	0.926591	0.0322575
General transcription factor IIE subunit 1	Gtf2e1	Q9D0D5	0.762701	0.0321202
Myo18a protein;Unconventional myosin-XVIIIa;Unconventional myosin-XVIIIa;Unconventional myosin-XVIIIa	Myo18a	B2RRE2;E9QAX2;K3W4L0;Q9JMH9	0.821875	0.031893
Glucocorticoid modulatory element-binding protein 1	Gmeb1	Q9JL60	0.181601	0.0317969
Dual specificity mitogen-activated protein kinase kinase 2;Dual-specificity mitogen-activated protein kinase kinase 2	Map2k2	Q63932;Q91YS7	0.0382181	0.0315889
Ribosome biogenesis protein NSA2 homolog	Nsa2	A0A286YCS8;Q9CR47	0.339609	0.0315538
General transcription factor 3C polypeptide 2	Gtf3c2	D3Z7I0	0.0385497	0.0315376
Stomatin-like protein 2, mitochondrial	Stoml2	Q99JB2	0.5918	0.0313952
Leucine--tRNA ligase, cytoplasmic	Lars1	Q8BMJ2	0.878061	0.0312911
39S ribosomal protein L38, mitochondrial	Mrpl38	Q8K2M0	0.0979988	0.0312822
Histone H1.0	H1-0	P10922	0.49869	0.0312244
Structural maintenance of chromosomes flexible hinge domain-containing protein 1	Smchd1	Q6P5D8	0.368887	0.0311794
Beta-adrenergic receptor kinase 1	Grk2	Q99MK8	0.243259	0.0311721
Mitogen-activated protein kinase 14	Mapk14	P47811	0.782476	0.0310333
Eukaryotic translation initiation factor 2 subunit 2	Eif2s2	Q99L45	0.358897	0.0308797
ATP-binding cassette sub-family G member 3	Abcg3	D3Z0Z4;Q99P81	0.485927	0.0308587
3-hydroxyisobutyryl-CoA hydrolase, mitochondrial	Hibch	Q8QZS1	0.438136	0.0307844
Enhancer of mRNA-decapping protein 4	Edc4	G5E896	0.667967	0.0307769
Prolyl endopeptidase	Prep	Q9QUR6	0.887122	0.0307461
mRNA export factor GLE1	Gle1	Q8R322	0.559941	0.0303887
RAS guanyl-releasing protein 2 (Fragment);RAS guanyl-releasing protein 2 (Fragment);RAS guanyl-releasing protein 2 (Fragment);RAS guanyl-releasing protein 2 (Fragment);RAS guanyl-releasing protein 2 (Fragment);RAS guanyl-releasing protein 2;RAS guanyl-releasing protein 2	Rasgrp2	D3YXD6;D3YZP2;D3YZX2;D3Z2F9;D3Z3N3;D6RDD3;Q9QUG9	0.229205	0.0299997
Receptor-interacting serine/threonine-protein kinase 1	Ripk1	Q60855	0.820676	0.0299385
Regulator of nonsense transcripts 2	Upf2	A2AT37	0.431514	0.0298691
Immunoglobulin-binding protein 1	Igbp1	Q61249	0.299635	0.0297078
Transcription factor E2-alpha	Tcf3	A0A0R4J014;E9PWE2;E9PWE5;P15806	0.8482	0.0296626
Aladin	Aaas	P58742	0.532278	0.0296578
Superoxide dismutase [Cu-Zn]	Sod1	P08228	0.399163	0.029637
Structural maintenance of chromosomes protein 5	Smc5	A0A286YDG5;Q8CG46	0.354967	0.0296285
Serine/threonine-protein kinase 38	Stk38	Q91VJ4	0.466155	0.0293952
FACT complex subunit SSRP1	Ssrp1	Q08943	0.684564	0.0292113
DnaJ homolog subfamily C member 8	Dnajc8	Q6NZB0	0.671271	0.0290926
Retinitis pigmentosa 9 protein homolog;Retinitis pigmentosa 9 (human)	rp9;Rp9	P97762;Q3UGI5	0.543742	0.0290339
Splicing factor 3A subunit 1	Sf3a1	Q8K4Z5	0.882495	0.0288104
NADH dehydrogenase [ubiquinone] 1 beta subcomplex subunit 3	Ndufb3	Q9CQZ6	0.84469	0.028609
Vacuolar protein sorting-associated protein 26B	Vps26b	Q8C0E2	0.94146	0.0285047
Protein CASC3	Casc3	Q8K3W3	0.0581882	0.0284612
Mortality factor 4-like protein 1	Morf4l1	P60762	0.387651	0.0284415
DnaJ homolog subfamily A member 1	Dnaja1	P63037	0.520752	0.0283609
RNA-binding protein 33	Rbm33	D3Z5I9;Q9CXK9	0.734567	0.0282034
40S ribosomal protein S27-like	Rps27l	Q6ZWY3	0.174253	0.0278875
Chromosome alignment-maintaining phosphoprotein 1	Champ1	Q8K327	0.759964	0.0278465
Nucleolar protein 56	Nop56	Q9D6Z1	0.327672	0.0278394
60S acidic ribosomal protein P0	Rplp0	P14869	0.950649	0.0278282
RNA cytidine acetyltransferase	Nat10	Q8K224	0.569723	0.0277091
40S ribosomal protein S15	Rps15	P62843	0.199109	0.0275067
Eukaryotic translation initiation factor 3 subunit J-A;Eukaryotic translation initiation factor 3 subunit J-B	Eif3j1;Eif3j2	Q3UGC7;Q66JS6	0.846676	0.0273014
U5 small nuclear ribonucleoprotein 40 kDa protein	Snrnp40	Q6PE01	0.407432	0.0268861
Perilipin-3	Plin3	Q9DBG5	0.907839	0.0268384
Aflatoxin B1 aldehyde reductase member 2	Akr7a2	Q8CG76	0.487971	0.0268227
Cytosolic iron-sulfur assembly component 3	Ciao3	A0A494BA87;Q7TMW6	0.0089682	0.0266688
Dynactin subunit 1	Dctn1	E9Q3M3;E9Q586;O08788	0.427598	0.0264834
Aldo-keto reductase family 1 member A1	Akr1a1	Q9JII6	0.465933	0.0263963
Negative elongation factor E	Nelfe	P19426	0.285726	0.026371
Ran GTPase-activating protein 1	Rangap1	P46061	0.914955	0.0263171
Platelet-activating factor acetylhydrolase IB subunit alpha1	Pafah1b3	Q61205	0.880801	0.0261697
Small nuclear ribonucleoprotein E	Snrpe	P62305	0.730312	0.0261678
CKLF-like MARVEL transmembrane domain-containing protein 7	Cmtm7	A0A1L1SRR1;Q9ESD6	0.996038	0.0259878
High mobility group protein HMG-I/HMG-Y	Hmga1	P17095	0.960994	0.0259856
Dedicator of cytokinesis protein 10	Dock10	E9QM99;Q8BZN6	0.49074	0.0258814
T-complex protein 1 subunit epsilon	Cct5	P80316	0.29767	0.0258526
Small nuclear ribonucleoprotein Sm D2	Snrpd2	P62317	0.61758	0.0256555
PHD finger protein 23 (Fragment);PHD finger protein 23	Phf23	B0QZH9;Q8BSN5	0.581636	0.0254345
Prefoldin subunit 5	Pfdn5	Q9WU28	0.713446	0.0251583
Exportin-5	Xpo5	Q924C1	0.917007	0.0251315
RNA-binding protein 8A	Rbm8a	Q9CWZ3	0.239028	0.0249425
[truncated: 2,146 more rows]
